# Supplementary material for: Per(poly)fluoroalkanesulfinamides assisted diastereoselective three-component inverse-electron-demand aza Diels–Alder reaction
Source: Royal Society of Chemistry journal article supplement (doi:10.1039/c0ob00699h), 2010-11-17

# Per(poly)fluoroalkanesulfinamides Assisted Diastereoselective Three-Component Inverse-Electron-Demand Aza Diels – Alder Reaction

*Peng Li, Li-Juan Liu, and Jin-Tao Liu\*.*

*Key Laboratory of Organofluorine Chemistry, Shanghai Institute of Organic Chemistry, Chinese Academy of Sciences, Shanghai 200032, China.*

*jtlou@mail.sioc.ac.cn*

## Supplementary Information

### Contents

|                                                                                             |     |
|---------------------------------------------------------------------------------------------|-----|
| General .....                                                                               | S2  |
| General procedure for the synthesis of per(poly)fluoroalkanesulfinamides <b>2a–2d</b> ..... | S2  |
| General procedure for the preparation of tetrahydropyridines <b>4a–4v</b> .....             | S2  |
| Transformations of cycloadducts .....                                                       | S7  |
| Determination of the stereochemistry of the products.....                                   | S9  |
| References.....                                                                             | S10 |
| NMR Spectra.....                                                                            | S11 |

## General

Unless otherwise mentioned, solvents and reagents were purchased from commercial sources and used as received. THF was freshly distilled over Na/benzophenone, CH<sub>2</sub>Cl<sub>2</sub> was distilled over CaH<sub>2</sub>. Melting points were measured on a Melt-Temp apparatus and uncorrected. <sup>1</sup>H NMR spectra were recorded on Bruker AM-300 or Mercury 300 (300 MHz) spectrometers with TMS as the internal standard. <sup>19</sup>F NMR spectra were recorded on Bruker AM-300 or Mercury 300 (282 MHz) spectrometers with CFC1<sub>3</sub> as the external standard. <sup>13</sup>C NMR spectra were recorded on DPX-400 (100.7 MHz) spectrometer. IR spectra were obtained with a Nicolet AV-360 spectrophotometer. Mass spectra were taken on a HP5989A spectrometer. HRMS data were obtained on a high-resolution mass spectrometer in the ESI or EI mode. α,β-Unsaturated ketones (aldehydes) were prepared according to the literature.<sup>1</sup>

## General Procedure for the Preparation of Perfluoroalkanesulfinamides 2a–2d.

To a flask containing HN(SiMe<sub>3</sub>)<sub>2</sub> (16 mL, 0.075 mol) was added dropwise per(poly)fluoroalkanesulfinyl chloride (0.075 mol) at 0 °C. After addition, stirring was continued for 2 h at room temperature. The TMS substituted sulfinamide intermediate was obtained by distillation under reduced pressure, which was further stirred with saturated aqueous ammonium chloride solution and purified by short column chromatography to give the target product 2.<sup>2</sup>

**2-Chloro-1,1,2,2-tetrafluoroethanesulfinamide (2a):** <sup>1</sup>H NMR (300 MHz, CDCl<sub>3</sub>): δ 4.96 (s, 2H); <sup>19</sup>F NMR (282 MHz, CDCl<sub>3</sub>): δ -67.29 (m, 2F), -121.10 (dd, *J*<sub>AB</sub> = 231.2 Hz, Δ*v* = 3.45, 2F).

**Trifluoromethanesulfinamide (2b):** <sup>1</sup>H NMR (300 MHz, CDCl<sub>3</sub>): δ 4.97 (s, 2H); <sup>19</sup>F NMR (282 MHz, CDCl<sub>3</sub>): δ -80.92 (s, 3F).

**Difluoro(phenyl)methanesulfinamide (2c):** <sup>1</sup>H NMR (300 MHz, CDCl<sub>3</sub>): δ 7.62-7.50 (m, 5H), 4.00 (s, 2H); <sup>19</sup>F NMR (282 MHz, CDCl<sub>3</sub>): δ -105.04 (dd, *J*<sub>AB</sub> = 226.4 Hz, Δ*v* = 4.40, 2F).

**Perfluorobutanesulfinamide (2d):** <sup>1</sup>H NMR (300 MHz, CDCl<sub>3</sub>): δ 4.86 (s, 2H); <sup>19</sup>F NMR (282 MHz, CDCl<sub>3</sub>): δ -81.22 (m, 3F), -121.93 (m, 2F), -122.46 (ddt, *J* = 430.3, 243.4, 8.46 Hz, 2F), -126.48 – -126.55 (m, 2F).

**(S<sub>s</sub>)-2-Chloro-1,1,2,2-tetrafluoroethanesulfinamide (2a):** A solution of 5<sup>3</sup> (0.5 mmol) in CH<sub>2</sub>Cl<sub>2</sub> (7 mL) was added slowly to LiHMDS (1 mmol) in CH<sub>2</sub>Cl<sub>2</sub> (3 mL) in 3h at -78 °C under the protection of N<sub>2</sub>. After addition, saturated ammonium chloride aqueous solution (5 mL) was added immediately. The resulting mixture was extracted with CH<sub>2</sub>Cl<sub>2</sub> (5 mL×3), washed with brine (10 mL), dried over Na<sub>2</sub>SO<sub>4</sub> and purified by silica gel chromatography (EtOAc/ Petroleum ether: 1/5) to afford a white solid (72% yield): mp 42–43 °C; [α]<sub>D</sub><sup>20</sup> = -15.4542 (*c* = 0.9850, CHCl<sub>3</sub>, >99%ee).

## General Procedure for the Preparation of Tetrahydropyridines 4a–4v.

To a solution of α, β-unsaturated ketone 1 (0.5 mmol), sulfinamide 2 (0.6 mmol) and vinyl ether 3 (1.0 mmol) in CH<sub>2</sub>Cl<sub>2</sub> (1 mL), Ti(OPr<sup>*i*</sup>)<sub>4</sub> (1.5 mmol) was added and the resulting mixture was stirred in a sealed vial at room temperature and monitored by TLC. After reaction, the mixture was poured into an equal volume of brine with rapid stirring and filtered through celite. The filter cake was washed with CH<sub>2</sub>Cl<sub>2</sub> (3 mL × 3). The combined filtrate was washed with brine (6 mL), dried over Na<sub>2</sub>SO<sub>4</sub>. After the removal of solvents under vacuum, the residue was purified by column chromatography on silica gel to afford 4.

**4a-major endo:** white solid, 147 mg, 65%; mp 55–57 °C; <sup>1</sup>H NMR (300 MHz, CDCl<sub>3</sub>): δ 7.33–7.19 (5H, m, ArH), 6.25 (1H, d, *J* = 3.3 Hz, =CH), 5.52 (1H, s, NCHO), 3.68 (1H, dt, *J* = 8.7, 2.4 Hz, CHPh), 3.58 (1H, dq, *J* = 9.3, 6.9 Hz, OCHHCH<sub>3</sub>), 3.37 (1H, dq, *J* = 9.3, 6.9 Hz, OCHHCH<sub>3</sub>), 2.63 (1H, ddd, *J* = 14.7, 9.0, 3.3 Hz, CH<sub>a</sub>H<sub>c</sub>), 2.41 (1H, d, *J* = 14.7 Hz, CH<sub>a</sub>H<sub>e</sub>), 1.05 (3H, t, *J* = 6.9, OCH<sub>2</sub>CH<sub>3</sub>); <sup>19</sup>F NMR (282 MHz, CDCl<sub>3</sub>): δ -64.38 (s, 3F), -67.88 (s, 2F), -116.51 (dd, *J*<sub>AB</sub> = 226.4 Hz, Δ*v* = 12.20, 2F); <sup>13</sup>C NMR (100 MHz, CDCl<sub>3</sub>): δ 143.6, 128.7, 128.5, 127.0, 121.6 (m), 120.7 (q, *J* = 272.5 Hz), 76.5, 63.6, 35.7, 34.8, 14.8; FT-IR (KBr): ν<sub>max</sub>

2983, 2900, 1668, 1494, 1456, 1392, 1341, 1308, 1251, 1188, 1177, 1143, 1116, 1056, 952, 929, 786, 703  $\text{cm}^{-1}$ ; EIHRMS:  $m/z$  453.0401 ( $\text{M}^+$ ,  $\text{C}_{16}\text{H}_{15}\text{ClF}_7\text{NO}_2\text{S}$  requires 453.0400).

**4b-major endo:** colorless oil, 122 mg, 63%;  $^1\text{H}$  NMR (300 MHz,  $\text{CDCl}_3$ ):  $\delta$  7.39–7.20 (5H, m, ArH), 6.27 (1H, d,  $J = 3.6$  Hz, =CH), 5.46 (1H, t,  $J = 2.7$  Hz, NCHO), 3.71–3.69 (1H, m, CHPh), 3.58 (1H, dq,  $J = 9.3, 6.9$  Hz, OCHHCH $_3$ ), 3.37 (1H, dq,  $J = 9.3, 6.9$  Hz, OCHHCH $_3$ ), 2.41 (2H, m,  $\text{CH}_a\text{H}_e$ ), 1.05 (3H, t,  $J = 6.9$ ,  $\text{OCH}_2\text{CH}_3$ );  $^{19}\text{F}$  NMR (282 MHz,  $\text{CDCl}_3$ ):  $\delta$  -63.95 (s, 3F), -73.97 (s, 3F);  $^{13}\text{C}$  NMR (100 MHz,  $\text{CDCl}_3$ ):  $\delta$  143.2, 128.5, 128.4, 128.3, 121.6 (m), 120.7 (q,  $J = 272.2$  Hz), 76.5, 63.4, 35.4, 34.6, 14.5; FT-IR (neat):  $\nu_{\text{max}}$  2981, 1668, 1494, 1455, 1394, 1339, 1305, 1250, 1189, 1126, 1061, 9542, 932, 701  $\text{cm}^{-1}$ ; EIMS ( $m/z$ , %): 387 ( $\text{M}^+$ , 1.34), 342 (2.52), 318 (34.25), 270 (2.92), 224 (48.42), 183 (100.00), 77 (8.44); EIHRMS:  $m/z$  387.0731 ( $\text{M}^+$ ,  $\text{C}_{15}\text{H}_{15}\text{F}_6\text{NO}_2\text{S}$  requires 387.0728).

**4c-major endo:** white solid, 93.5 mg, 42%; mp 96–98  $^\circ\text{C}$ ;  $^1\text{H}$  NMR (300 MHz,  $\text{CDCl}_3$ ):  $\delta$  7.63–7.46 (5H, m, ArH), 7.36–7.17 (5H, m, ArH), 6.21 (1H, d,  $J = 3.9$  Hz, =CH), 5.57 (1H, t,  $J = 2.6$  Hz, NCHO), 3.78–3.66 (1H, m, CHPh), 3.60 (1H, dq,  $J = 9.3, 6.9$  Hz, OCHHCH $_3$ ), 3.37 (1H, dq,  $J = 9.3, 6.9$  Hz, OCHHCH $_3$ ), 2.62 (1H, ddd,  $J = 14.7, 9.3, 3.0$  Hz,  $\text{CH}_a\text{H}_e$ ), 2.41 (1H, d,  $J = 14.7$  Hz,  $\text{CH}_a\text{H}_e$ ), 1.04 (3H, t,  $J = 6.9$ ,  $\text{OCH}_2\text{CH}_3$ );  $^{19}\text{F}$  NMR (282 MHz,  $\text{CDCl}_3$ ):  $\delta$  -64.43 (s, 3F), -105.43 (dd,  $J_{AB} = 210.1$  Hz,  $\Delta\nu = 15.22$ , 2F);  $^{13}\text{C}$  NMR (100 MHz,  $\text{CDCl}_3$ ):  $\delta$  143.9, 131.9, 129.7, 129.0, 128.5, 128.2, 126.5, 126.0, 121.0 (q,  $J = 272.2$  Hz), 119.9 (m), 76.0, 63.0, 35.6, 34.8, 14.7; FT-IR (KBr):  $\nu_{\text{max}}$  3066, 3032, 2978, 1663, 1604, 1494, 1454, 1394, 1338, 1303, 1278, 1189, 1142, 1068, 956, 932, 888, 758, 699  $\text{cm}^{-1}$ ; EIMS ( $m/z$ , %): 445 ( $\text{M}^+$ , 0.58), 400 (0.90), 270 (7.09), 225 (11.55), 183 (22.75), 127 (100.00), 77 (9.98); EIHRMS  $m/z$  445.1131 ( $\text{M}^+$ ,  $\text{C}_{21}\text{H}_{20}\text{F}_5\text{NO}_2\text{S}$  requires 445.1135).

**4d-major endo:** colorless oil, 146.3 mg, 59%;  $^1\text{H}$  NMR (300 MHz,  $\text{CDCl}_3$ ):  $\delta$  7.39–7.13 (5H, m, ArH), 6.26 (1H, d,  $J = 3.6$  Hz, =CH), 5.53 (1H, s, NCHO), 3.74–3.64 (1H, m, CHPh), 3.58 (1H, dq,  $J = 9.3, 6.9$  Hz, OCHHCH $_3$ ), 3.37 (1H, dq,  $J = 9.3, 6.9$  Hz, OCHHCH $_3$ ), 2.56–2.34 (2H, m,  $\text{CH}_a\text{H}_e$ ), 1.06 (3H, t,  $J = 6.9$ ,  $\text{OCH}_2\text{CH}_3$ );  $^{19}\text{F}$  NMR (282 MHz,  $\text{CDCl}_3$ ):  $\delta$  -64.73 (s, 3F), -80.8–82.0 (m, 3F), -118.2 (dd,  $J_{AB} = 238.8$  Hz,  $\Delta\nu = 12.34$ , 2F), -122.6 (s, 2F), -126.7 (t,  $J = 304.8$  Hz, 2F);  $^{13}\text{C}$  NMR (100 MHz,  $\text{CDCl}_3$ ):  $\delta$  143.3, 128.4, 128.3, 126.8, 121.5 (m), 120.7 (q,  $J = 272.7$  Hz), 76.2, 63.4, 35.5, 34.6, 14.5; FT-IR (neat):  $\nu_{\text{max}}$  2982, 1668, 1605, 1495, 1394, 1350, 1339, 1304, 1240, 1195, 1139, 1143, 1061, 955, 932, 746, 700, 691  $\text{cm}^{-1}$ ; EIMS ( $m/z$ , %): 318 ( $\text{M}^+ - \text{C}_4\text{F}_9$ , 32.86), 270 (6.36), 225 (23.42), 183 (100.00), 77 (21.12); EIHRMS:  $m/z$  537.0636 ( $\text{M}^+$ ,  $\text{C}_{18}\text{H}_{15}\text{F}_{12}\text{NO}_2\text{S}$  requires 537.0632).

**4e-major endo:** colorless oil; 151.9 mg, 63%;  $^1\text{H}$  NMR (300 MHz,  $\text{CDCl}_3$ ):  $\delta$  7.35–7.17 (5H, m, ArH), 6.27 (1H, d,  $J = 3.6$  Hz, =CH), 5.47 (1H, t,  $J = 2.4$  Hz, NCHO), 3.75–3.65 (1H, m, CHPh), 3.31 (1H, dd,  $J = 9.3, 6.3$  Hz, OCHHCH( $\text{CH}_3$ ) $_2$ ), 3.12 (1H, dd,  $J = 9.3, 6.0$  Hz, OCHHCH( $\text{CH}_3$ ) $_2$ ), 2.52 (1H, ddd,  $J = 14.4, 9.0, 3.0$  Hz,  $\text{CH}_a\text{H}_e$ ), 2.45 (1H, d,  $J = 14.4$  Hz,  $\text{CH}_a\text{H}_e$ ), 1.74–1.58 (1H, m,  $\text{OCH}_2\text{CH}(\text{CH}_3)_2$ ), 0.77 (3H, d,  $J = 6.3$  Hz,  $\text{OCH}_2\text{CH}(\text{CH}_3)_2$ ), 0.74 (3H, d,  $J = 6.9$  Hz,  $\text{OCH}_2\text{CH}(\text{CH}_3)_2$ );  $^{19}\text{F}$  NMR (282 MHz,  $\text{CDCl}_3$ ):  $\delta$  -64.05 (s, 3F), -67.63 (dd,  $J_{AB} = 183.3$  Hz,  $\Delta\nu = 0.20$ , 2F), -116.32 (dd,  $J_{AB} = 226.4$  Hz,  $\Delta\nu = 12.22$ , 2F);  $^{13}\text{C}$  NMR (100 MHz,  $\text{CDCl}_3$ ):  $\delta$  143.4, 128.3, 128.2, 126.7, 121.2 (m), 120.7 (q,  $J = 272.5$  Hz), 76.9, 76.8, 75.1, 35.2, 34.5, 28.1, 19.2, 19.1; FT-IR (neat):  $\nu_{\text{max}}$  2961, 2875, 1666, 1604, 1494, 1473, 1454, 1394, 1340, 1303, 1250, 1180, 1140, 1057, 1013, 948, 929, 788, 701  $\text{cm}^{-1}$ ; HREIMS:  $m/z$  481.0720 ( $\text{M}^+$ ,  $\text{C}_{18}\text{H}_{19}\text{ClF}_7\text{NO}_2\text{S}$  requires 481.0713).

**4f-major endo:** colorless oil; 161.3 mg, 67%;  $^1\text{H}$  NMR (300 MHz,  $\text{CDCl}_3$ ):  $\delta$  7.36–7.15 (5H, m, ArH), 6.26 (1H, d,  $J = 3.3$  Hz, =CH), 5.49 (1H, s, NCHO), 3.71–3.67 (1H, m, CHPh), 3.53 (1H, dt,  $J = 9.6, 6.3$  Hz, OCHHC $_3\text{H}_7$ ), 3.31 (1H, dt,  $J = 9.6, 6.3$  Hz, OCHHC $_3\text{H}_7$ ), 2.51 (1H, ddd,  $J = 14.4, 9.0, 3.0$  Hz,  $\text{CH}_a\text{H}_e$ ), 2.42 (1H, d,  $J = 14.4$  Hz,  $\text{CH}_a\text{H}_e$ ), 1.45–1.31 (2H,  $\text{OCH}_2\text{CH}_2\text{CH}_2\text{CH}_3$ ), 1.30–1.10 (2H,  $\text{OCH}_2\text{CH}_2\text{CH}_2\text{CH}_3$ ), 0.83 (3H, t,  $J = 6.9$ ,  $\text{OC}_3\text{H}_6\text{CH}_3$ );  $^{19}\text{F}$  NMR (282 MHz,  $\text{CDCl}_3$ ):  $\delta$  -64.07 (s, 3F), -67.66 (s, 2F), -116.28 (dd,  $J_{AB} = 226.4$  Hz,  $\Delta\nu = 12.26$ , 2F);  $^{13}\text{C}$  NMR (100 MHz,  $\text{CDCl}_3$ ):  $\delta$  143.6, 128.5, 126.9, 121.3 (m), 120.9 (q,  $J = 272.5$  Hz), 76.9, 76.8, 68.1, 35.6, 34.7, 31.4, 19.4, 13.9; FT-IR (neat):  $\nu_{\text{max}}$  2961, 2936, 2875, 1667, 1494, 1392, 1339, 1303, 1249,

1219, 1180, 1141, 1077, 1057, 1013, 948, 893, 789, 701  $\text{cm}^{-1}$ ; EIHRMS:  $m/z$  481.0708 ( $\text{M}^+$ ,  $\text{C}_{18}\text{H}_{19}\text{ClF}_7\text{NO}_2\text{S}$  requires 481.0713).

**4g-major endo:** colorless oil; 158.8 mg, 63%;  $^1\text{H}$  NMR (300 MHz,  $\text{CDCl}_3$ ):  $\delta$  7.32–7.19 (5H, m, ArH), 6.27 (1H, d,  $J = 2.7$  Hz, =CH), 5.61 (1H, s, NCHO), 3.73–3.64 (1H, m, CHPh), 3.60–3.46 (1H, m, OCH( $\text{CH}_2$ )<sub>5</sub>), 2.51 (1H, ddd,  $J = 14.4, 9.0, 3.0$  Hz,  $\text{CH}_a\text{H}_e$ ), 2.36 (1H, d,  $J = 14.4$  Hz,  $\text{CH}_a\text{H}_e$ ), 1.82–1.05 (10H, m, OCH( $\text{CH}_2$ )<sub>5</sub>);  $^{19}\text{F}$  NMR (282 MHz,  $\text{CDCl}_3$ ):  $\delta$  -64.97 (s, 3F), -68.42 (m, 2F), -117.15 (dd,  $J_{AB} = 226.4$  Hz,  $\Delta\nu = 12.40$ , 2F);  $^{13}\text{C}$  NMR (100 MHz,  $\text{CDCl}_3$ ):  $\delta$  143.6, 128.5, 128.2, 126.6, 121.7 (m), 120.6 (q,  $J = 272.2$  Hz), 73.7, 35.4, 34.9, 32.6, 30.7, 25.6, 23.5, 23.1; FT-IR (neat):  $\nu_{\text{max}}$  2937, 2860, 1668, 1605, 1494, 1454, 1337, 1303, 1251, 1180, 1139, 1056, 942, 896, 858, 789, 700  $\text{cm}^{-1}$ ; EIMS: ( $m/z$ , %): 408 ( $\text{M}^+ - \text{C}_6\text{H}_{11}\text{O}$ , 4.09), 372 ( $\text{M}^+ - \text{C}_2\text{F}_4\text{Cl}$ , 38.00), 324 (2.94), 290 (64.72), 246 (100.00), 225 (37.83), 183 (40.32), 83 (63.87), 55 (44.69); EIHRMS:  $m/z$  507.0875 ( $\text{M}^+$ ,  $\text{C}_{20}\text{H}_{21}\text{ClF}_7\text{NO}_2\text{S}$  requires 507.0870).

**4h-major endo:** colorless oil, as a 10/1 mixture with the minor *endo* diastereomer; 107.4 mg, 46%;  $^1\text{H}$  NMR (300 MHz,  $\text{CDCl}_3$ ):  $\delta$  7.37–7.20 (5H, m, ArH), 6.22 (1H, d,  $J = 3.0$  Hz, =CH), 5.64 (1H, s, NCHO), 5.34 (2H, d,  $J = 5.6$  Hz, = $\text{CH}_2$ ), 4.25 (1H, s, CHPh), 3.64 (1H, dq,  $J = 9.3, 6.9$  Hz, OCHHCH<sub>3</sub>), 3.45 (1H, dq,  $J = 9.3, 6.9$  Hz, OCHHCH<sub>3</sub>), 1.14 (3H, t,  $J = 6.9$  Hz, OCH<sub>2</sub>CH<sub>3</sub>);  $^{19}\text{F}$  NMR (282 MHz,  $\text{CDCl}_3$ ):  $\delta$  -65.06 (s, 3F), -68.54 (s, 2F), -115.07 (dd,  $J_{AB} = 222.2$  Hz,  $\Delta\nu = 9.86$ , 2F);  $^{13}\text{C}$  NMR (100 MHz,  $\text{CDCl}_3$ ):  $\delta$  141.7, 141.3, 128.6, 128.3, 127.1, 122.7, 120.6 (q,  $J = 272.5$  Hz), 117.8, 80.3, 63.2, 44.0, 14.8; FT-IR (neat):  $\nu_{\text{max}}$  3313, 2981, 2932, 1669, 1603, 1496, 1446, 1403, 1326, 1311, 1261, 1185, 1139, 1089, 1045, 934, 901, 790, 703  $\text{cm}^{-1}$ ; EIMS ( $m/z$ , %): 330 ( $\text{M}^+ - \text{C}_2\text{F}_4\text{Cl}$ , 47.34), 282 (5.31), 236 (100.00), 216 (54.15), 115 (17.45), 91 (10.78), 77 (6.92); EIHRMS:  $m/z$  465.0392 ( $\text{M}^+$ ,  $\text{C}_{17}\text{H}_{15}\text{ClF}_7\text{NO}_2\text{S}$  requires 465.0400).

**4j-major endo:** white solid, mp 61–63 °C; 172.4 mg, 65%;  $^1\text{H}$  NMR (300 MHz,  $\text{CDCl}_3$ ):  $\delta$  7.29–7.16 (2H, m, ArH), 6.90–6.81 (2H, m, ArH), 6.21 (1H, d,  $J = 3.0$  Hz, =CH), 5.45 (1H, s, NCHO), 4.14–4.04 (1H, m, CHPh), 3.85 (3H, s, OCH<sub>3</sub>), 3.29 (1H, dd,  $J = 9.3, 6.3$  Hz, OCHHCH( $\text{CH}_3$ )<sub>2</sub>), 3.10 (1H, dd,  $J = 9.3, 6.0$  Hz, OCHHCH( $\text{CH}_3$ )<sub>2</sub>), 2.45 (1H, ddd,  $J = 14.4, 9.0, 2.7$  Hz,  $\text{CH}_a\text{H}_e$ ), 2.45 (1H, d,  $J = 14.4$  Hz,  $\text{CH}_a\text{H}_e$ ), 1.72–1.56 (1H, m, OCH<sub>2</sub>CH( $\text{CH}_3$ )<sub>2</sub>), 0.77 (3H, d,  $J = 6.3$  Hz, OCH<sub>2</sub>CH( $\text{CH}_3$ )<sub>2</sub>), 0.72 (3H, d,  $J = 6.3$  Hz, OCH<sub>2</sub>CH( $\text{CH}_3$ )<sub>2</sub>);  $^{19}\text{F}$  NMR (282 MHz,  $\text{CDCl}_3$ ):  $\delta$  -64.05 (s, 3F), -68.36 (m, 2F), -116.99 (dd,  $J_{AB} = 226.4$  Hz,  $\Delta\nu = 12.38$ , 2F);  $^{13}\text{C}$  NMR (100 MHz,  $\text{CDCl}_3$ ):  $\delta$  156.0, 131.1, 129.8, 127.8, 121.4, 120.8 (q,  $J = 272.4$  Hz), 120.1, 109.9, 77.2, 75.0, 55.2, 33.0, 28.6, 28.1, 19.2, 19.1; FT-IR (KBr):  $\nu_{\text{max}}$  2960, 1662, 1602, 1493, 1472, 1338, 1301, 1249, 1195, 1181, 1141, 1121, 1056, 949, 863, 787, 751  $\text{cm}^{-1}$ ; EIHRMS:  $m/z$  511.0818 ( $\text{M}^+$ ,  $\text{C}_{19}\text{H}_{21}\text{ClF}_7\text{NO}_3\text{S}$  requires 511.0819).

**4k-major endo:** colorless oil; 149.8 mg, 59%;  $^1\text{H}$  NMR (300 MHz,  $\text{CDCl}_3$ ):  $\delta$  7.19 (2H,  $J = 8.7$  Hz, ArH), 6.80 (2H,  $J = 8.7$  Hz, ArH), 6.21 (1H, d,  $J = 3.6$  Hz, =CH), 5.44 (1H, s, NCHO), 3.77 (3H, s, OCH<sub>3</sub>), 3.67–3.55 (1H, m, CHPh), 3.29 (1H, dd,  $J = 9.0, 6.9$  Hz, OCHHCH( $\text{CH}_3$ )<sub>2</sub>), 3.11 (1H, dd,  $J = 9.3, 6.3$  Hz, OCHHCH( $\text{CH}_3$ )<sub>2</sub>), 2.47 (1H, ddd,  $J = 14.7, 9.0, 3.3$  Hz,  $\text{CH}_a\text{H}_e$ ), 2.38 (1H, d,  $J = 14.7$  Hz,  $\text{CH}_a\text{H}_e$ ), 1.74–1.60 (1H, m, OCH<sub>2</sub>CH( $\text{CH}_3$ )<sub>2</sub>), 0.78 (3H, d,  $J = 6.6$  Hz, OCH<sub>2</sub>CH( $\text{CH}_3$ )<sub>2</sub>), 0.74 (3H, d,  $J = 6.6$  Hz, OCH<sub>2</sub>CH( $\text{CH}_3$ )<sub>2</sub>);  $^{19}\text{F}$  NMR (282 MHz,  $\text{CDCl}_3$ ):  $\delta$  -64.77 (s, 3F), -68.38 (s, 2F), -117.09 (dd,  $J_{AB} = 226.4$  Hz,  $\Delta\nu = 12.15$ , 2F);  $^{13}\text{C}$  NMR (100 MHz,  $\text{CDCl}_3$ ):  $\delta$  158.3, 135.7, 129.3, 121.8 (m), 120.7 (q,  $J = 272.2$  Hz), 113.7, 76.8, 75.1, 55.2, 34.7, 28.1, 18.8; FT-IR (neat):  $\nu_{\text{max}}$  2961, 2934, 2876, 1668, 1612, 1514, 1466, 1394, 1340, 1304, 1255, 1180, 1140, 1058, 948, 896, 829, 789  $\text{cm}^{-1}$ ; EIHRMS:  $m/z$  511.0821 ( $\text{M}^+$ ,  $\text{C}_{19}\text{H}_{21}\text{ClF}_7\text{NO}_3\text{S}$  requires 511.0819).

**4l-major endo:** white solid, mp 44–46 °C; 159.0 mg, 64%;  $^1\text{H}$  NMR (300 MHz,  $\text{CDCl}_3$ ):  $\delta$  7.18 (2H,  $J = 7.8$  Hz, ArH), 7.10 (2H,  $J = 7.8$  Hz, ArH), 6.24 (1H, d,  $J = 3.0$  Hz, =CH), 5.47 (1H, s, NCHO), 3.70–3.60 (1H, m, CHPh), 3.31 (1H, dd,  $J = 9.0, 6.3$  Hz, OCHHCH( $\text{CH}_3$ )<sub>2</sub>), 3.14 (1H, dd,  $J = 9.0, 6.0$  Hz, OCHHCH( $\text{CH}_3$ )<sub>2</sub>), 2.51 (1H, ddd,  $J = 14.7, 9.0, 3.3$  Hz,  $\text{CH}_a\text{H}_e$ ), 2.38 (1H, d,  $J = 14.7$  Hz,  $\text{CH}_a\text{H}_e$ ), 2.32 (3H, s, CH<sub>3</sub>), 1.76–1.62 (1H, m, OCH<sub>2</sub>CH( $\text{CH}_3$ )<sub>2</sub>), 0.80 (3H, d,  $J = 6.6$  Hz, OCH<sub>2</sub>CH( $\text{CH}_3$ )<sub>2</sub>), 0.77 (3H, d,  $J = 6.6$  Hz, OCH<sub>2</sub>CH( $\text{CH}_3$ )<sub>2</sub>);  $^{19}\text{F}$  NMR

(282 MHz, CDCl<sub>3</sub>):  $\delta$  -64.83 (s, 3F), -68.40 (s, 2F), -117.14 (dd,  $J_{AB}$  = 226.4 Hz,  $\Delta\nu$  = 12.17, 2F); <sup>13</sup>C NMR (100 MHz, CDCl<sub>3</sub>):  $\delta$  140.5, 136.3, 129.0, 128.1, 125.0 (m), 121.9, 120.8 (q,  $J$  = 272.4 Hz), 76.8, 75.1, 35.0, 34.7, 28.1, 20.9, 19.2, 19.1; FT-IR (KBr):  $\nu_{\max}$  2963, 1664, 1513, 1338, 1305, 1249, 1119, 1057, 947, 817, 789 cm<sup>-1</sup>; EIHRMS:  $m/z$  495.0873 (M<sup>+</sup>, C<sub>19</sub>H<sub>21</sub>ClF<sub>7</sub>NO<sub>2</sub>S requires 495.0870).

**4m-major endo:** colorless oil; 172.9 mg, 67%; <sup>1</sup>H NMR (300 MHz, CDCl<sub>3</sub>):  $\delta$  7.27 (2H,  $J$  = 8.7 Hz, ArH), 7.22 (2H,  $J$  = 8.7 Hz, ArH), 6.20 (1H, d,  $J$  = 3.3 Hz, =CH), 5.47 (1H, s, NCHO), 3.73–3.62 (1H, m, CHPh), 3.30 (1H, dd,  $J$  = 9.0, 6.3 Hz, OCHHCH(CH<sub>3</sub>)<sub>2</sub>), 3.12 (1H, dd,  $J$  = 9.0, 6.0 Hz, OCHHCH(CH<sub>3</sub>)<sub>2</sub>), 2.50 (1H, ddd,  $J$  = 14.4, 9.0, 3.0 Hz, CH<sub>a</sub>H<sub>e</sub>), 2.41 (1H, d,  $J$  = 14.4 Hz, CH<sub>a</sub>H<sub>e</sub>), 1.74–1.58 (1H, m, OCH<sub>2</sub>CH(CH<sub>3</sub>)<sub>2</sub>), 0.77 (3H, d,  $J$  = 6.6 Hz, OCH<sub>2</sub>CH(CH<sub>3</sub>)<sub>2</sub>), 0.74 (3H, d,  $J$  = 6.6 Hz, OCH<sub>2</sub>CH(CH<sub>3</sub>)<sub>2</sub>); <sup>19</sup>F NMR (282 MHz, CDCl<sub>3</sub>):  $\delta$  -64.86 (s, 3F), -68.46 (s, 2F), -117.05 (dd,  $J_{AB}$  = 226.4 Hz,  $\Delta\nu$  = 12.02, 2F); <sup>13</sup>C NMR (100 MHz, CDCl<sub>3</sub>):  $\delta$  142.1, 132.7, 129.8, 128.6, 120.8 (q,  $J$  = 272.4 Hz), 120.3 (m), 76.9, 75.4, 34.9, 34.5, 28.3, 19.4, 19.3; FT-IR (neat):  $\nu_{\max}$  2963, 2877, 1667, 1493, 1395, 1342, 1303, 1249, 1179, 1058, 948, 896, 790 cm<sup>-1</sup>; EIHRMS:  $m/z$  515.0331 (M<sup>+</sup>, C<sub>18</sub>H<sub>18</sub>Cl<sub>2</sub>F<sub>7</sub>NO<sub>2</sub>S requires 515.0324).

**4n-major endo:** colorless oil; 165.7 mg, 59%; <sup>1</sup>H NMR (300 MHz, CDCl<sub>3</sub>):  $\delta$  7.42 (2H,  $J$  = 8.7 Hz, ArH), 7.17 (2H,  $J$  = 8.7 Hz, ArH), 6.20 (1H, d,  $J$  = 3.3 Hz, =CH), 5.48 (1H, s, NCHO), 3.73–3.60 (1H, m, CHPh), 3.31 (1H, dd,  $J$  = 9.0, 6.3 Hz, OCHHCH(CH<sub>3</sub>)<sub>2</sub>), 3.13 (1H, dd,  $J$  = 9.0, 6.3 Hz, OCHHCH(CH<sub>3</sub>)<sub>2</sub>), 2.50 (1H, ddd,  $J$  = 14.4, 9.3, 2.7 Hz, CH<sub>a</sub>H<sub>e</sub>), 2.41 (1H, d,  $J$  = 14.4 Hz, CH<sub>a</sub>H<sub>e</sub>), 1.74–1.59 (1H, m, OCH<sub>2</sub>CH(CH<sub>3</sub>)<sub>2</sub>), 0.78 (3H, d,  $J$  = 6.9 Hz, OCH<sub>2</sub>CH(CH<sub>3</sub>)<sub>2</sub>), 0.74 (3H, d,  $J$  = 6.9 Hz, OCH<sub>2</sub>CH(CH<sub>3</sub>)<sub>2</sub>); <sup>19</sup>F NMR (282 MHz, CDCl<sub>3</sub>):  $\delta$  -64.78 (s, 3F), -68.39 (s, 2F), -116.97 (dd,  $J_{AB}$  = 226.4 Hz,  $\Delta\nu$  = 12.27, 2F); <sup>13</sup>C NMR (100 MHz, CDCl<sub>3</sub>):  $\delta$  142.4, 131.4, 130.0, 122.0, 120.6 (q,  $J$  = 272.8 Hz), 120.0 (m), 76.7, 75.1, 34.7, 34.3, 28.1, 19.2, 19.1; FT-IR (neat):  $\nu_{\max}$  2962, 2929, 2876, 1668, 1490, 1394, 1341, 1303, 1249, 1180, 1124, 1058, 1012, 948, 895, 789 cm<sup>-1</sup>; EIMS ( $m/z$ , %): 424 (M<sup>+</sup> - C<sub>2</sub>F<sub>4</sub>Cl, 31.72), 376 (6.24), 302 (60.22), 261 (29.46), 57 (100.00); EIHRMS:  $m/z$  558.9812 (M<sup>+</sup>, C<sub>18</sub>H<sub>18</sub>BrClF<sub>7</sub>NO<sub>2</sub>S requires 558.9818).

**4o-major endo:** colorless oil; 108.52 mg, 46%; <sup>1</sup>H NMR (300 MHz, CDCl<sub>3</sub>):  $\delta$  7.31 (1H, d,  $J$  = 2.1 Hz, ArH), 6.28 (1H, dd,  $J$  = 3.0, 2.1 Hz, ArH), 6.24 (1H, d,  $J$  = 3.3 Hz, ArH), 6.07 (1H, d,  $J$  = 3.3 Hz, =CH), 5.50 (1H, s, NCHO), 3.82–3.73 (1H, m, CHPh), 3.22 (1H, dd,  $J$  = 9.0, 6.3 Hz, OCHHCH<sub>3</sub>), 3.13 (1H, dd,  $J$  = 9.0, 6.0 Hz, OCHHCH<sub>3</sub>), 2.67 (2H, d,  $J$  = 14.7, CH<sub>a</sub>H<sub>e</sub>), 2.27 (1H, ddd,  $J$  = 14.7, 9.0, 2.7 Hz, CH<sub>a</sub>H<sub>e</sub>), 1.68–1.53 (1H, m, OCH<sub>2</sub>CH(CH<sub>3</sub>)<sub>2</sub>), 0.73 (3H, d,  $J$  = 3.6 Hz, OCH<sub>2</sub>CH(CH<sub>3</sub>)<sub>2</sub>), 0.71 (3H, d,  $J$  = 3.6 Hz, OCH<sub>2</sub>CH(CH<sub>3</sub>)<sub>2</sub>); <sup>19</sup>F NMR (282 MHz, CDCl<sub>3</sub>):  $\delta$  -64.74 (s, 3F), -68.27 (dd,  $J_{AB}$  = 183.3 Hz,  $\Delta\nu$  = 0.20, 2F), -116.65 (dd,  $J_{AB}$  = 226.4 Hz,  $\Delta\nu$  = 12.59, 2F); <sup>13</sup>C NMR (100 MHz, CDCl<sub>3</sub>):  $\delta$  154.9, 140.9, 120.6 (q,  $J$  = 272.3 Hz), 116.9 (q,  $J$  = 5.3 Hz), 110.3, 105.6, 76.4, 74.7, 69.8, 30.7, 29.2, 28.0, 19.0, 18.9; FT-IR (neat):  $\nu_{\max}$  2962, 2877, 1670, 1615, 1506, 1474, 1395, 1338, 1314, 1289, 1260, 1181, 1122, 1060, 1013, 948, 894, 790 cm<sup>-1</sup>; EIMS ( $m/z$ , %): 336 (M<sup>+</sup> - C<sub>2</sub>F<sub>4</sub>Cl, 12.31), 236 (100.00), 214 (25.35), 184 (29.00), 57 (41.27); EIHRMS:  $m/z$  471.0501 (M<sup>+</sup>, C<sub>16</sub>H<sub>17</sub>ClF<sub>7</sub>NO<sub>3</sub>S requires 471.0506).

**4p-major endo:** white solid, mp 64–66 °C; 159.1 mg, 60%; <sup>1</sup>H NMR (300 MHz, CDCl<sub>3</sub>):  $\delta$  7.99 (1H, d,  $J$  = 8.1 Hz, ArH), 7.91 (1H, d,  $J$  = 7.5 Hz, ArH), 7.77 (1H, dd,  $J$  = 6.9, 2.7 Hz, ArH), 7.61–7.47 (2H, m, ArH), 7.45–7.36 (2H, m, ArH), 6.39 (1H, d,  $J$  = 3.3 Hz, =CH), 5.48 (1H, s, NCHO), 3.50–3.41 (1H, m, CHPh), 3.31 (1H, dd,  $J$  = 8.7, 6.9 Hz, OCHHCH<sub>3</sub>), 3.07 (1H, dd,  $J$  = 9.0, 6.0 Hz, OCHHCH<sub>3</sub>), 2.56 (2H, d,  $J$  = 13.8, CH<sub>a</sub>H<sub>e</sub>), 2.70 (1H, ddd,  $J$  = 13.8, 9.9, 3.0 Hz, CH<sub>a</sub>H<sub>e</sub>), 1.69–1.56 (1H, m, OCH<sub>2</sub>CH(CH<sub>3</sub>)<sub>2</sub>), 0.76 (3H, d,  $J$  = 6.9 Hz, OCH<sub>2</sub>CH(CH<sub>3</sub>)<sub>2</sub>), 0.70 (3H, d,  $J$  = 6.9 Hz, OCH<sub>2</sub>CH(CH<sub>3</sub>)<sub>2</sub>); <sup>19</sup>F NMR (282 MHz, CDCl<sub>3</sub>):  $\delta$  -64.67 (s, 3F), -68.26 (s, 2F), -116.87 (dd,  $J_{AB}$  = 226.7 Hz,  $\Delta\nu$  = 12.45, 2F); <sup>13</sup>C NMR (100 MHz, CDCl<sub>3</sub>):  $\delta$  138.4, 134.0, 130.4, 129.4, 127.5, 126.7, 126.3, 125.4, 125.2, 122.1, 121.1, 120.7 (q,  $J$  = 272.2 Hz), 77.0, 76.7, 75.1, 34.0, 30.1, 28.1, 19.2, 19.1; FT-IR (KBr):  $\nu_{\max}$  3064, 2961, 2933, 2876, 1943, 1668, 1600, 1511, 1473, 1396, 1340, 1305, 1247, 1178, 1140, 1059, 1013, 948, 896, 860, 798, 782, 651 cm<sup>-1</sup>; EIMS ( $m/z$ , %): 531 (M<sup>+</sup>, 5.44), 348 (3.48), 275

(52.94), 274 (100.00), 148 (8.28), 127 (11.59), 57 (23.57); EIHRMS:  $m/z$  531.0868 ( $M^+$ ,  $C_{22}H_{21}ClF_7NO_2S$  requires 531.0870).

**4q-major endo:** colorless oil; 99.5 mg, 38%;  $^1H$  NMR (300 MHz,  $CDCl_3$ ):  $\delta$  7.32–7.24 (2H, m, ArH), 7.23–7.14 (3H, m, ArH), 6.02 (1H, d,  $J = 3.3$  Hz, =CH), 5.44 (1H, s, NCHO), 3.26 (1H, dd,  $J = 9.0, 6.9$  Hz, OCHHPr<sup>*f*</sup>), 3.17 (1H, dd,  $J = 9.3, 6.0$  Hz, OCHHPr<sup>*f*</sup>), 2.62 (2H, t = 6.9 Hz,  $CH_2CH_2CH_2Ph$ ), 2.32 (1H, s (b), CHPh), 2.16 (1H, d,  $J = 14.4$  Hz,  $CH_aH_e$ ), (1H, ddd,  $J = 14.4, 7.8, 1.2$  Hz,  $CH_aH_e$ ), 1.84–1.58 (5H, m,  $CH_2CH_2CH_2Ph$ ,  $OCH_2CH(CH_3)_2$ ), 0.83 (3H, d,  $J = 6.9$ ,  $OCH_2CH(CH_3)_2$ ), 0.80 (3H, d,  $J = 6.9$ ,  $OCH_2CH(CH_3)_2$ );  $^{19}F$  NMR (282 MHz,  $CDCl_3$ ):  $\delta$  -64.42 (s, 3F), -68.14 (s, 2F), -116.56 (dd,  $J_{AB} = 226.4$  Hz,  $\Delta\nu = 12.57$ , 2F);  $^{13}C$  NMR (125 MHz,  $CDCl_3$ ):  $\delta$  142.0, 128.4, 126.0, 122.1, 120.8 (q,  $J = 272.5$  Hz), 77.2, 74.7, 35.8, 35.1, 30.3, 29.0, 28.1, 19.3, 19.2; FT-IR (neat):  $\nu_{max}$  2961, 2933, 2872, 1666, 1606, 1497, 1455, 1394, 1343, 1297, 1257, 1237, 1179, 1123, 1059, 946, 909, 788, 736, 700  $cm^{-1}$ ; EIMS ( $m/z$ , %): 388 ( $M^+ - C_2F_4Cl$ , 11.96), 340 (1.73), 266 (18.39), 91 (100.00), 57 (47.29); EIHRMS:  $m/z$  450.0532 ( $M^+ - OBU^i$ ,  $C_{17}H_{16}ClF_7NOS$  requires 450.0529).

**4r-major endo:** colorless oil; 73.9 mg, 32%;  $^1H$  NMR (300 MHz,  $CDCl_3$ ):  $\delta$  6.04 (1H, d,  $J = 3.9$  Hz, =CH), 5.45 (1H, s, NCHO), 3.28 (1H, dd,  $J = 9.0, 6.9$  Hz, OCHHPr<sup>*f*</sup>), 3.18 (1H, dd,  $J = 9.3, 6.0$  Hz, OCHHPr<sup>*f*</sup>), 2.29 (1H, s (b), CHPh), 2.16 (1H, d,  $J = 14.1$  Hz,  $CH_aH_e$ ), 2.02 (1H, dd,  $J = 14.1, 8.4$  Hz,  $CH_aH_e$ ), 1.84–1.68 (1H, m,  $OCH_2CH(CH_3)_2$ ), 1.67–1.54 (2H, m,  $CH_2(CH_2)_2CH_3$ ), 1.44–1.27 (4H, m,  $CH_2(CH_2)_2CH_3$ ), 0.91 (3H, t,  $J = 6.9$ ,  $(CH_2)_3CH_3$ ), 0.85 (6H, d,  $J = 6.9$ ,  $OCH_2CH(CH_3)_2$ );  $^{19}F$  NMR (282 MHz,  $CDCl_3$ ):  $\delta$  -64.59 (s, 3F), -68.29 (s, 2F), -116.78 (dd,  $J_{AB} = 226.4$  Hz,  $\Delta\nu = 12.53$ , 2F);  $^{13}C$  NMR (100 MHz,  $CDCl_3$ ):  $\delta$  122.5 (m), 120.8 (q,  $J = 272.2$  Hz), 77.2, 74.6, 35.2, 30.4, 30.3, 29.3, 28.1, 22.5, 19.2, 19.1, 13.9; FT-IR (neat):  $\nu_{max}$  2963, 2934, 2876, 1666, 1470, 1395, 1344, 1297, 1179, 1142, 1056, 1012, 948, 898, 789  $cm^{-1}$ ; EIMS ( $m/z$ , %): 388 ( $M^+ - OBU^i$ , 5.25), 326 ( $M^+ - C_2F_4Cl$ , 19.09), 204 (21.28), 57 (100.00); EIHRMS:  $m/z$  461.1028 ( $M^+$ ,  $C_{16}H_{23}ClF_7NO_2S$  requires 461.1026).

**4s-major endo:** colorless oil; 117.2 mg, 47%;  $^1H$  NMR (300 MHz,  $CDCl_3$ ):  $\delta$  7.35–7.19 (5H, m, ArH), 6.24 (1H, s, =CH), 5.50 (1H, s, NCHO), 3.74–3.68 (1H, m, CHPh), 3.43 (1H, dd,  $J = 9.0, 6.3$  Hz, OCHHPr<sup>*f*</sup>), 3.14 (1H, dd,  $J = 9.0, 6.3$  Hz, OCHHPr<sup>*f*</sup>), 2.49 (1H, ddd,  $J = 14.4, 9.3, 2.7$  Hz,  $CH_aH_e$ ), 2.27 (1H, d,  $J = 14.4$  Hz,  $CH_aH_e$ ), 1.69 (1H, m,  $OCH_2CH(CH_3)_2$ ), 0.78 (3H, d,  $J = 6.9$ ,  $OCH_2CH(CH_3)_2$ ), 0.74 (3H, d,  $J = 6.9$ ,  $OCH_2CH(CH_3)_2$ );  $^{19}F$  NMR (282 MHz,  $CDCl_3$ ):  $\delta$  -50.13 (dd,  $J_{AB} = 230.7$  Hz,  $\Delta\nu = 15.81$ , 2F), -68.29 (s, 2F), -116.61 (dd,  $J_{AB} = 230.7$  Hz,  $\Delta\nu = 12.65$ , 2F);  $^{13}C$  NMR (100 MHz,  $CDCl_3$ )  $\delta$  143.6, 128.3, 128.2, 126.6.5, 119.6 (m), 76.9, 76.8, 75.3, 35.3, 34.5, 28.2, 19.3, 19.2; FT-IR (neat):  $\nu_{max}$  2962, 2876, 2212, 1656, 1604, 1496, 1473, 1455, 1392, 1342, 1288, 1258, 1235, 1216, 1178, 1152, 1121, 1056, 1022, 949, 898, 788, 700  $cm^{-1}$ ; EIMS: ( $m/z$ , %): 424 ( $M^+ - OBU^i$ , 4.32), 362 ( $M^+ - C_2F_4Cl$ , 37.81), 314 (7.82), 240 (48.70), 91 (32.52), 77 (24.71), 57 (100.00); EIHRMS:  $m/z$  497.0415 ( $M^+$ ,  $C_{18}H_{19}Cl_2F_6NO_2S$  requires 497.0418).

**4t-major endo:** pale yellow solid, mp 51–53 °C; 180.5 mg, 68%;  $^1H$  NMR (300 MHz,  $CDCl_3$ ):  $\delta$  7.38–7.19 (5H, m, ArH), 6.69 (1H,  $J = 3.0$  Hz, =CH), 5.41 (1H,  $J = 2.4$  Hz, NCHO), 5.26–5.10 (1H, m,  $CO_2CH_2CH(CH_3)_2$ ), 3.68 (1H, d,  $J = 9.3$  Hz, CHPh), 3.43 (1H, dd,  $J = 9.6, 6.9$  Hz, OCHHPr<sup>*f*</sup>), 3.22 (1H, dd,  $J = 9.3, 6.0$  Hz, OCHHPr<sup>*f*</sup>), 2.66 (1H, ddd,  $J = 15.0, 10.2, 3.6$  Hz,  $CH_aH_e$ ), 2.37 (1H, d,  $J = 15.0$  Hz,  $CH_aH_e$ ), 1.83–1.69 (1H, m,  $OCH_2CH(CH_3)_2$ ), 1.32 (6H, d,  $J = 6.3$  Hz,  $OCH_2CH(CH_3)_2$ ), 0.83 (3H, d,  $J = 6.9$  Hz,  $OCH_2CH(CH_3)_2$ ), 0.81 (3H, d,  $J = 6.9$  Hz,  $OCH_2CH(CH_3)_2$ );  $^{19}F$  NMR (282 MHz,  $CDCl_3$ ):  $\delta$  -67.32 (dd,  $J_{AB} = 181.3$  Hz,  $\Delta\nu = 0.38$ , 2F), -116.43 (dd,  $J_{AB} = 226.7$  Hz,  $\Delta\nu = 11.95$ , 2F);  $^{13}C$  NMR (100 MHz,  $CDCl_3$ ):  $\delta$  162.0, 144.3, 130.8, 128.4, 126.8, 126.7, 74.9, 70.0, 36.7, 35.8, 28.2, 21.7, 21.6, 19.3, 19.2; FT-IR (KBr):  $\nu_{max}$  2960, 2874, 1716, 1640, 1493, 1468, 1455, 1390, 1377, 1286, 1245, 1220, 1173, 1088, 1057, 1024, 974, 896, 789, 768, 701  $cm^{-1}$ ; EIHRMS:  $m/z$  456.0663 ( $M^+ - Pr^j$ ,  $C_{18}H_{19}ClF_4NO_4S$  requires 531.0870).

**4v-major endo:** white solid, mp 109–111 °C; 131.2 mg, 56.6%;  $^1H$  NMR (300 MHz,  $CDCl_3$ ):  $\delta$  7.51 (1H, s, =CH), 7.37–7.21 (5H, m, ArH), 4.93 (1H, s, NCHO), 3.85 (1H, d,  $J = 7.2$  Hz, CHPh), 3.22 (1H, dd,  $J = 8.3, 6.5$  Hz, OCHHPr<sup>*f*</sup>), 2.86 (1H, dd,  $J = 8.3, 6.5$  Hz, OCHHPr<sup>*f*</sup>), 2.53 (1H, ddd,  $J = 13.8, 2.7, 2.4$  Hz,  $CH_aH_e$ ), 2.26 (1H, ddd,  $J = 13.8, 7.2, 2.7$  Hz,  $CH_aH_e$ ), 0.93 (1H, m,  $OCH_2CH(CH_3)_2$ ), 0.69 (3H, d,  $J = 6.9$ ,  $OCH_2CH(CH_3)_2$ ), 0.60

(3H, d,  $J = 6.9$ ,  $\text{OCH}_2\text{CH}(\text{CH}_3)_2$ );  $^{19}\text{F}$  NMR (282 MHz,  $\text{CDCl}_3$ ):  $\delta$  -67.37 (s, 2F), -116.58 (dd,  $J_{AB} = 230.7$  Hz,  $\Delta\nu = 8.43$ , 2F);  $^{13}\text{C}$  NMR (125 MHz,  $\text{CDCl}_3$ ):  $\delta$  140.1, 133.2, 128.4, 127.8, 127.0, 118.1, 95.5, 83.8, 75.7, 37.2, 34.2, 28.2, 18.9, 18.8; FT-IR (KBr):  $\nu_{\text{max}}$  2960, 2874, 2212, 1631, 1449, 1386, 1365, 1268, 1142, 1105, 1058, 1012, 976, 894, 799, 747, 698  $\text{cm}^{-1}$ ; Anal. Calcd. for  $\text{C}_{18}\text{H}_{19}\text{ClF}_4\text{N}_2\text{O}_2\text{S}$ : C, 49.26; H, 4.36; N, 6.38. Found: C, 49.39; H, 4.63; N, 6.19.

**4v-minor endo:** colorless oil, 42.8 mg, 19.5%;  $^1\text{H}$  NMR (300 MHz,  $\text{CDCl}_3$ ):  $\delta$  7.39–7.15 (6H, m, ArH, =CH), 5.15 (1H, t,  $J = 3.3$  Hz, NCHO), 3.82 (1H, dd,  $J = 6.6$ , 3.6 Hz, CHPh), 3.20 (1H, dd,  $J = 8.4$ , 6.5 Hz, OCHHP $r^i$ ), 2.92 (1H, dd,  $J = 8.4$ , 6.5 Hz, OCHHP $r^i$ ), 2.54 (1H, dt,  $J = 13.8$ , 3.9 Hz,  $\text{CH}_a\text{H}_e$ ), 2.27 (1H, ddd,  $J = 13.8$ , 7.2, 2.7 Hz,  $\text{CH}_a\text{H}_e$ ), 1.48 (1H, m,  $\text{OCH}_2\text{CH}(\text{CH}_3)_2$ ), 0.66 (3H, d,  $J = 6.3$ ,  $\text{OCH}_2\text{CH}(\text{CH}_3)_2$ ), 0.58 (3H, d,  $J = 6.3$ ,  $\text{OCH}_2\text{CH}(\text{CH}_3)_2$ );  $^{19}\text{F}$  NMR (282 MHz,  $\text{CDCl}_3$ ):  $\delta$  -68.07 (m, 2F), -115.25 (dd,  $J_{AB} = 222.4$  Hz,  $\Delta\nu = 11.73$ , 2F);  $^{13}\text{C}$  NMR (100 MHz,  $\text{CDCl}_3$ ):  $\delta$  140.0, 135.7, 128.5, 127.6, 127.1, 118.1, 94.9, 83.1, 76.1, 37.6, 34.8, 28.1, 18.8; EIMS ( $m/z$ , %): 438 ( $\text{M}^+$ , 1.15), 365 (5.58), 303 (49.82), 229 (43.02), 203 (46.96), 181 (50.13), 140 (64.96), 57 (100.00); EIHRMS:  $m/z$  438.0801 ( $\text{M}^+$ ,  $\text{C}_{18}\text{H}_{19}\text{ClF}_4\text{N}_2\text{O}_2\text{S}$  requires 438.0792).

( $S_S$ , 2*S*, 4*R*)-**6-major endo:**  $[\alpha]_{\text{D}}^{28} = +131.8^\circ$  ( $\text{CHCl}_3$ ,  $c$  1.0); Enantiomeric excess: > 99.9%, HPLC (OD column) 0.7 mL/min (n-hexane/isopropanol = 98/2):  $t_{\text{R}}$  8.0 (minor),  $t_{\text{R}}$  8.8 (major).

### Transformations of Cycloadduct.

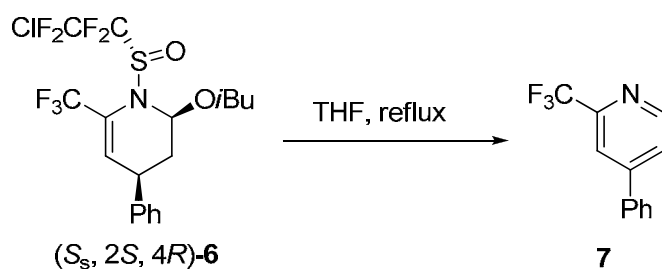

Compound ( $S_S$ , 2*S*, 4*R*)-**6** (70 mg, 0.15 mmol) was dissolved in THF (2 mL) and the mixture was refluxed overnight. After removal of the solvent, the residue was purified by column chromatography to give product **7** as a colorless oil (17.4 mg, 52% yield);  $^1\text{H}$  NMR (300 MHz,  $\text{CDCl}_3$ ):  $\delta$  8.77 (1H, d,  $J = 5.1$  Hz), 7.90 (1H, s), 7.71–7.63 (3H, m), 7.57–7.45 (3H, m);  $^{19}\text{F}$  NMR (282 MHz,  $\text{CDCl}_3$ ):  $\delta$  -67.97 (s, 3F);  $^{13}\text{C}$  NMR (100 MHz,  $\text{CDCl}_3$ ):  $\delta$  150.1, 136.5, 129.5, 129.0, 126.7, 123.8, 121.7, 120.6 (q,  $J_{AB} = 271.4$  Hz), 118.1 (m); FT-IR (neat):  $\nu_{\text{max}}$  2956, 2926, 2854, 1693, 1606, 1460, 1378, 1336, 1261, 1183, 1149, 1089, 1023, 803, 762, 697  $\text{cm}^{-1}$ ; LRMS (ESI):  $m/z$  224.0 ( $\text{M}^+ + 1$ ); EIHRMS:  $m/z$  223.0607 ( $\text{M}^+$ ,  $\text{C}_{12}\text{H}_8\text{F}_3\text{N}$  requires 223.0609).

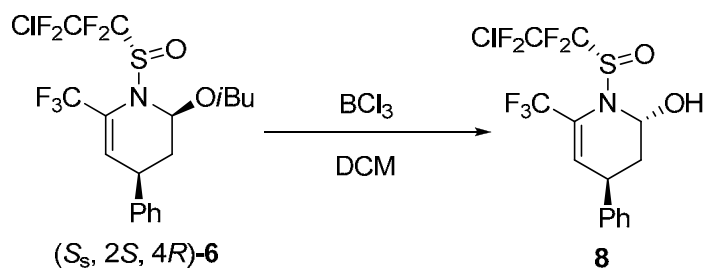

To a solution of compound ( $S_S$ , 2*S*, 4*R*)-**6** (0.1 mmol) in  $\text{CH}_2\text{Cl}_2$  (1 mL), was added  $\text{BCl}_3$  (dissolved in  $\text{CH}_2\text{Cl}_2$ , 0.1 mmol) at 0 °C. The mixture was stirred at that temperature for 1 h and then quenched with 5 mL saturated aqueous  $\text{NH}_4\text{Cl}$  solution. The resulted mixture was extracted with  $\text{CH}_2\text{Cl}_2$  (5 mL  $\times$  3). The combined organic

phase was dried over  $\text{Na}_2\text{SO}_4$  and concentrated. The residue was purified by flash chromatography to afford **8** as a white solid (24.7 mg, 58% yield); mp 114–115 °C;  $^1\text{H}$  NMR (300 MHz,  $\text{CDCl}_3$ ):  $\delta$  7.40–7.18 (5H, m, ArH), 6.22 (1H, s, =CH), 5.93 (1H, s, NCH(OH)), 3.86 (1H, m, CHPh), 2.67 (1H, s, NCH(OH)), 2.43 (1H, dddd,  $J = 13.8, 6.6, 2.7, 1.2$  Hz,  $\text{CH}_d\text{H}_e$ ), 1.84 (1H, t,  $J = 13.8$  Hz,  $\text{CH}_a\text{H}_b$ );  $^{19}\text{F}$  NMR (282 MHz,  $\text{CDCl}_3$ ):  $\delta$  -65.22 (s, 3F), -68.38 (s, 2F), -114.53 (dd,  $J_{AB} = 222.5$  Hz,  $\Delta\nu = 14.75$ , 2F);  $^{13}\text{C}$  NMR (100 MHz,  $\text{CDCl}_3$ ):  $\delta$  140.9, 129.1, 127.6, 127.5, 122.6 (m), 120.6 (q,  $J_{AB} = 271.6$  Hz), 77.3, 73.7, 36.8, 34.4; FT-IR (KBr):  $\nu_{\text{max}}$  3421, 1662, 1495, 1455, 1395, 1303, 1207, 1183, 1153, 1126, 1105, 1053, 811, 701  $\text{cm}^{-1}$ ; EIMS ( $m/z$ , %): 290 ( $\text{M}^+ - \text{C}_2\text{F}_4\text{Cl}$ , 40.89), 242 (5.94), 224 (32.52), 183 (100.00), 77 (24.89); EIHRMS:  $m/z$  425.0089 ( $\text{M}^+$ ,  $\text{C}_{14}\text{H}_{11}\text{ClF}_7\text{NO}_2\text{S}$  requires 425.0087);  $[\alpha]_{\text{D}}^{27} = +53.6^\circ$  ( $\text{CHCl}_3$ ,  $c$  1.0).

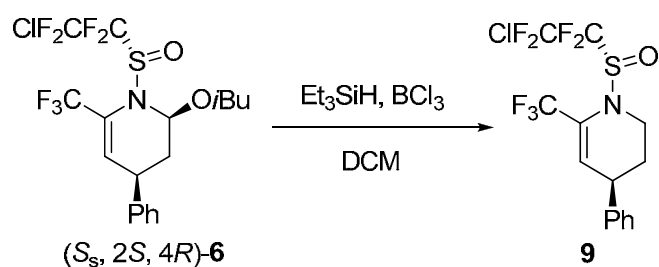

To a solution of compound (*Ss*, 2*S*, 4*R*)-**6** (0.3 mmol) and  $\text{Et}_3\text{SiH}$  (0.9 mmol) in  $\text{CH}_2\text{Cl}_2$  (3 mL), was added  $\text{BCl}_3$  (dissolved in  $\text{CH}_2\text{Cl}_2$ , 0.9 mmol) at 0 °C. The mixture was stirred at room temperature for 2 h and then quenched with saturated aqueous  $\text{NH}_4\text{Cl}$  solution. The resulted mixture was extracted with  $\text{CH}_2\text{Cl}_2$  (6 mL  $\times$  3). The combined organic phase was dried over  $\text{Na}_2\text{SO}_4$  and concentrated. The residue was purified by flash chromatography to afford **9** as a colorless oil (78.2 mg, 65% yield);  $^1\text{H}$  NMR (300 MHz,  $\text{CDCl}_3$ ):  $\delta$  7.40–7.17 (5H, m, ArH), 6.06 (1H, d,  $J = 2.4$  Hz, =CH), 4.04 (1H, d,  $J = 13.2$  Hz), 3.71–3.60 (1H, m, CHPh), 3.50 (1H, t,  $J = 11.7$  Hz), 2.34–2.23 (1H, m), 1.98–1.56 (1H, m);  $^{19}\text{F}$  NMR (282 MHz,  $\text{CDCl}_3$ ):  $\delta$  -64.97 (s, 3F), -68.58 (s, 2F), -114.84 (dd,  $J_{AB} = 222.5$  Hz,  $\Delta\nu = 10.73$ , 2F);  $^{13}\text{C}$  NMR (100 MHz,  $\text{CDCl}_3$ ):  $\delta$  141.7, 128.9, 127.4, 127.3, 120.4 (q,  $J_{AB} = 271.8$  Hz), 119.7 (dd,  $J_{AB} = 5.3$  Hz,  $\Delta\nu = 0.05$ ), 39.9, 38.7, 31.0; FT-IR (neat):  $\nu_{\text{max}}$  2937, 2871, 1656, 1494, 1454, 1390, 1347, 1294, 1263, 1183 (b), 1135 (b), 1059, 1015, 967, 793, 701, 642  $\text{cm}^{-1}$ ; EIMS ( $m/z$ , %): 274 ( $\text{M}^+ - \text{C}_2\text{F}_4\text{Cl}$ , 100.00), 226 (19.36), 224 (34.83), 183 (32.45), 91 (26.73), 77 (10.95); EIHRMS:  $m/z$  409.0132 ( $\text{M}^+$ ,  $\text{C}_{14}\text{H}_{11}\text{ClF}_7\text{NOS}$  requires 409.0138);  $[\alpha]_{\text{D}}^{25} = +117.0^\circ$  ( $\text{CHCl}_3$ ,  $c$  1.0).

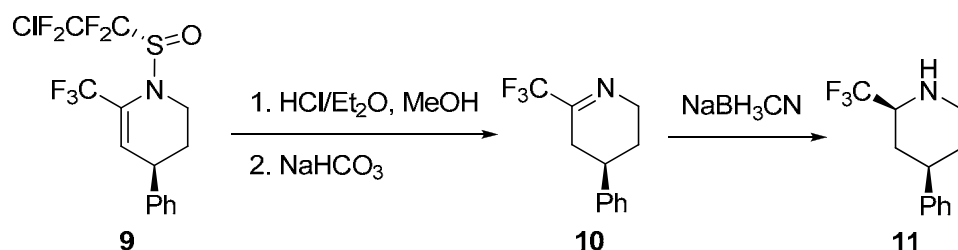

To a solution of compound **9** (0.3 mmol) in MeOH (5 mL) was added HCl/ $\text{Et}_2\text{O}$  (1M, 5 mL), and the mixture was stirred at 50 °C for 1h. The reaction mixture was then evaporated. The residue was dissolved in  $\text{CH}_2\text{Cl}_2$ , and washed with saturated aqueous  $\text{NaHCO}_3$  solution. The organic phase was dried and concentrated to give imine **10** without further purification.

The above imine was dissolved in MeOH (3 mL),  $\text{NaBH}_3\text{CN}$  (0.75 mmol) and a few drops of glacial AcOH was added at 0 °C. The resulting mixture was stirred at room temperature for 2h. Then the reaction mixture was



concentrated and  $\text{CH}_2\text{Cl}_2$  (5 mL) was added. The organic phase was washed with saturated aqueous  $\text{NaHCO}_3$  solution, dried over  $\text{Na}_2\text{SO}_4$  and concentrated. The residue was purified by flash column chromatography to afford **11** as a colorless oil<sup>4</sup> (48.9 mg, 71% total yield);  $^1\text{H}$  NMR (400 MHz,  $\text{CDCl}_3$ ):  $\delta$  7.36–7.28 (2H, m, ArH), 7.27–7.19 (3H, m, ArH), 3.36–3.22 (2H, m, H-2 and H-6), 2.82 (1H, td,  $J$  = 12.4, 2.5 Hz, H-6), 2.65 (1H, tt,  $J$  = 12.4, 3.2 Hz, H-4), 2.05 (1H, d,  $J$  = 12.4 Hz, H-3), 1.86 (1H, d,  $J$  = 12.4 Hz, H-5), 1.76 (1H, s, NH), 1.67 (1H, qd,  $J$  = 12.4, 4.0 Hz, H-3), 1.64 (1H, q,  $J$  = 12.4 Hz, H-5);  $^{19}\text{F}$  NMR (282 MHz,  $\text{CDCl}_3$ ):  $\delta$  -77.73 (s, 3F);  $^{13}\text{C}$  NMR (100 MHz,  $\text{CDCl}_3$ ):  $\delta$  145.0, 128.6, 126.7, 126.6, 125.6 (q,  $J_{AB}$  = 273.6 Hz), 58.4 (q,  $J_{AB}$  = 28.6 Hz), 46.1, 41.6, 33.1, 32.3; FT-IR (neat):  $\nu_{\text{max}}$  3335, 2929, 2848, 1603, 1494, 1453, 1395, 1373, 1270, 1230, 1176, 1147, 1129, 1100, 814, 759, 263.78  $\text{cm}^{-1}$ ; EIMS ( $m/z$ , %): 230 ( $\text{M}^+$  + H, 8.76), 229 ( $\text{M}^+$ , 58.07), 160 (100.00), 104 (20.37), 91 (20.09), 77 (14.85), 56 (71.78); EIHRMS:  $m/z$  229.1079 ( $\text{M}^+$ ,  $\text{C}_{12}\text{H}_{14}\text{F}_3\text{N}$  requires 229.1078);  $[\alpha]_{\text{D}}^{23}$  =  $-6.5^\circ$  (MeOH,  $c$  1.4); Enantiomeric excess: 98 %, HPLC (Lux  $5\mu$  Cellulose-2 column) 0.3 mL/min (n-hexane/isopropanol = 99/1):  $t_{\text{R}}$  18.3 (minor),  $t_{\text{R}}$  19.4 (major).

### Determination of the Stereochemistry of the Products

#### a) Stereochemistry *endo*

It is well-known that the Diels-Alder reaction of N-sulfinyl-1-aza-1,3-dienes takes place with very high *endo*-selectivity<sup>5</sup>. We have confirmed this stereochemistry by X-ray diffraction analysis of **4c** (see below). The data of X-ray structure of **4c** are found at the end of the Supporting Information.

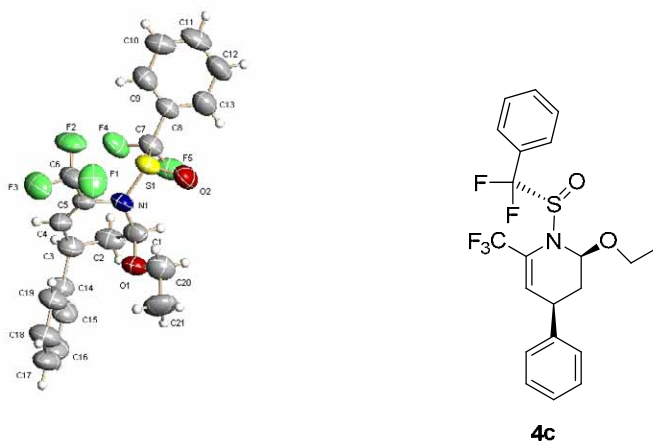

#### b) Relative Stereochemistry of Product **8**

The Lewis acid-promoted nucleophilic replacement of the alkoxy group is known to proceed with inversion of configuration<sup>5c, 5d</sup>. We have confirmed this stereochemistry by X-ray diffraction analysis of ( $\pm$ )-**7** (see below). Data of X-ray structure of ( $\pm$ )-**7** are found at the end of the Supporting Information.

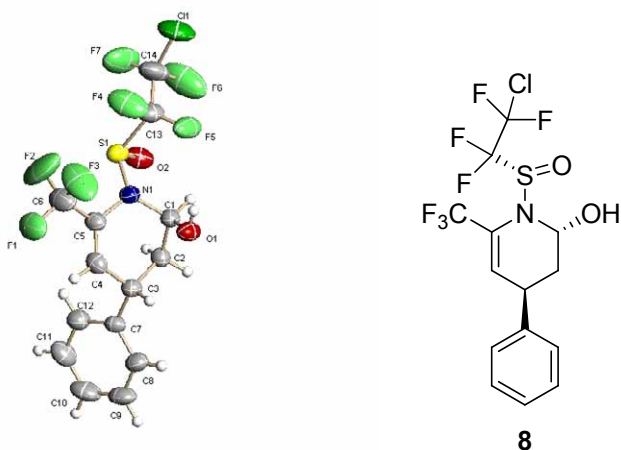

### c) Relative Stereochemistry of Product **11**

The relative stereochemistry of **11** has been established by NMR. <sup>1</sup>H NMR experiments allowed proton assignment, while the 2D-NOESY experiments were decisive for the determination of relative stereochemistry. Some critical NOE contacts are shown in the Figure below. On the other hand, the relative stereochemistry is in agreement with the anticipated<sup>6</sup> axial addition of hydride to the specific half-chaired imine intermediate **10**.

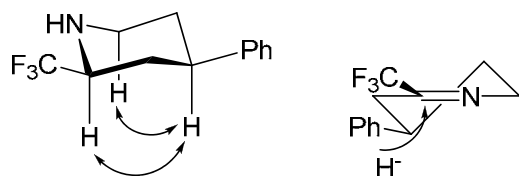

### References

- <sup>1</sup> a) R. J. Andrew, J. M. Mellor, *Tetrahedron* **2000**, *56*, 7261. b) M. Hojo, R. Masuda, Y. Kokuryo, H. Shioda, S. Matsuo, *Chem. Lett.* **1976**, 499. c) M. Hojo, R. Masuda, E. Okada, S. Sakaguchi, H. Narumiya, K. Morimoto, *Tetrahedron Lett.* **1989**, *30*, 6173. d) M. A. P. Martins, D. J. Emmerich, C. M. P. Pereira, W. Cunico, M. Rossato, N. Zanatta, H. G. Bonacorso, *Tetrahedron Lett.* **2004**, *45*, 4935. e) X.-J. Wang, Y. Zhao, J.-T. Liu, *Org. Lett.* **2007**, *9*, 1343 and references cited therein.
- <sup>2</sup> X.-J. Wang, J.-T. Liu, *Tetrahedron* **2005**, *61*, 6982.
- <sup>3</sup> V. D. Romanenko, C. Thoumazet, V. Lavallo, F. S. Tham, G. Bertrand, *Chem. Commun.* **2003**, 1680.
- <sup>4</sup> Gheorghe et al. *Tetrahedron* **2007**, *63*, 7187.
- <sup>5</sup> a) W. L. Corbett, T. T. Curran, A. M. Kasper, D. L. Boger, *J. Am. Chem. Soc.* **1991**, *113*, 1713. b) W. L. Corbett, D. L. Boger, *J. Org. Chem.* **1993**, 2068. c) R. C. Clark, S. S. Pfeiffer, D. L. Boger, *J. Am. Chem. Soc.* **2006**, 2587. d) J. Esquivias, R. G. Arrayás, J. C. Carretero, *J. Am. Chem. Soc.* **2007**, *129*, 1480.
- <sup>6</sup> G. Stork, D. Q. Niu, A. Fujimoto, E. R. Koft, J. M. Balkovec, J. R. Tata, G. R. Dake *J. Am. Chem. Soc.* **2001**, *123*, 3239 and references therein.

### NMR Spectra

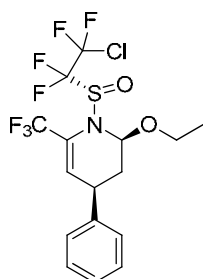

4a-major endo

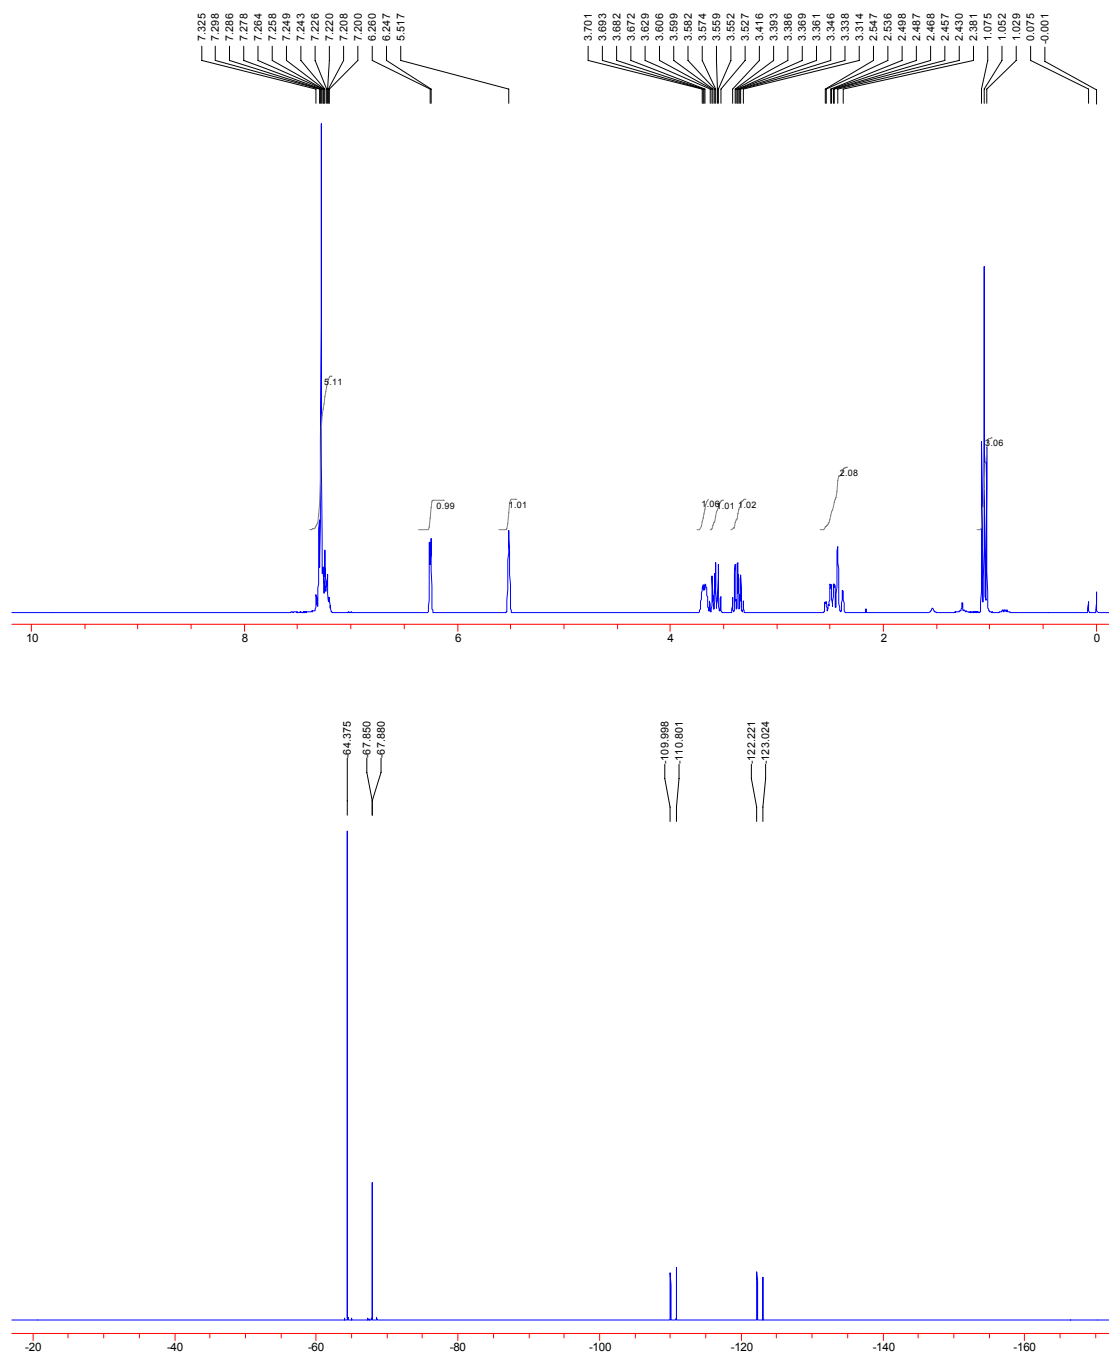

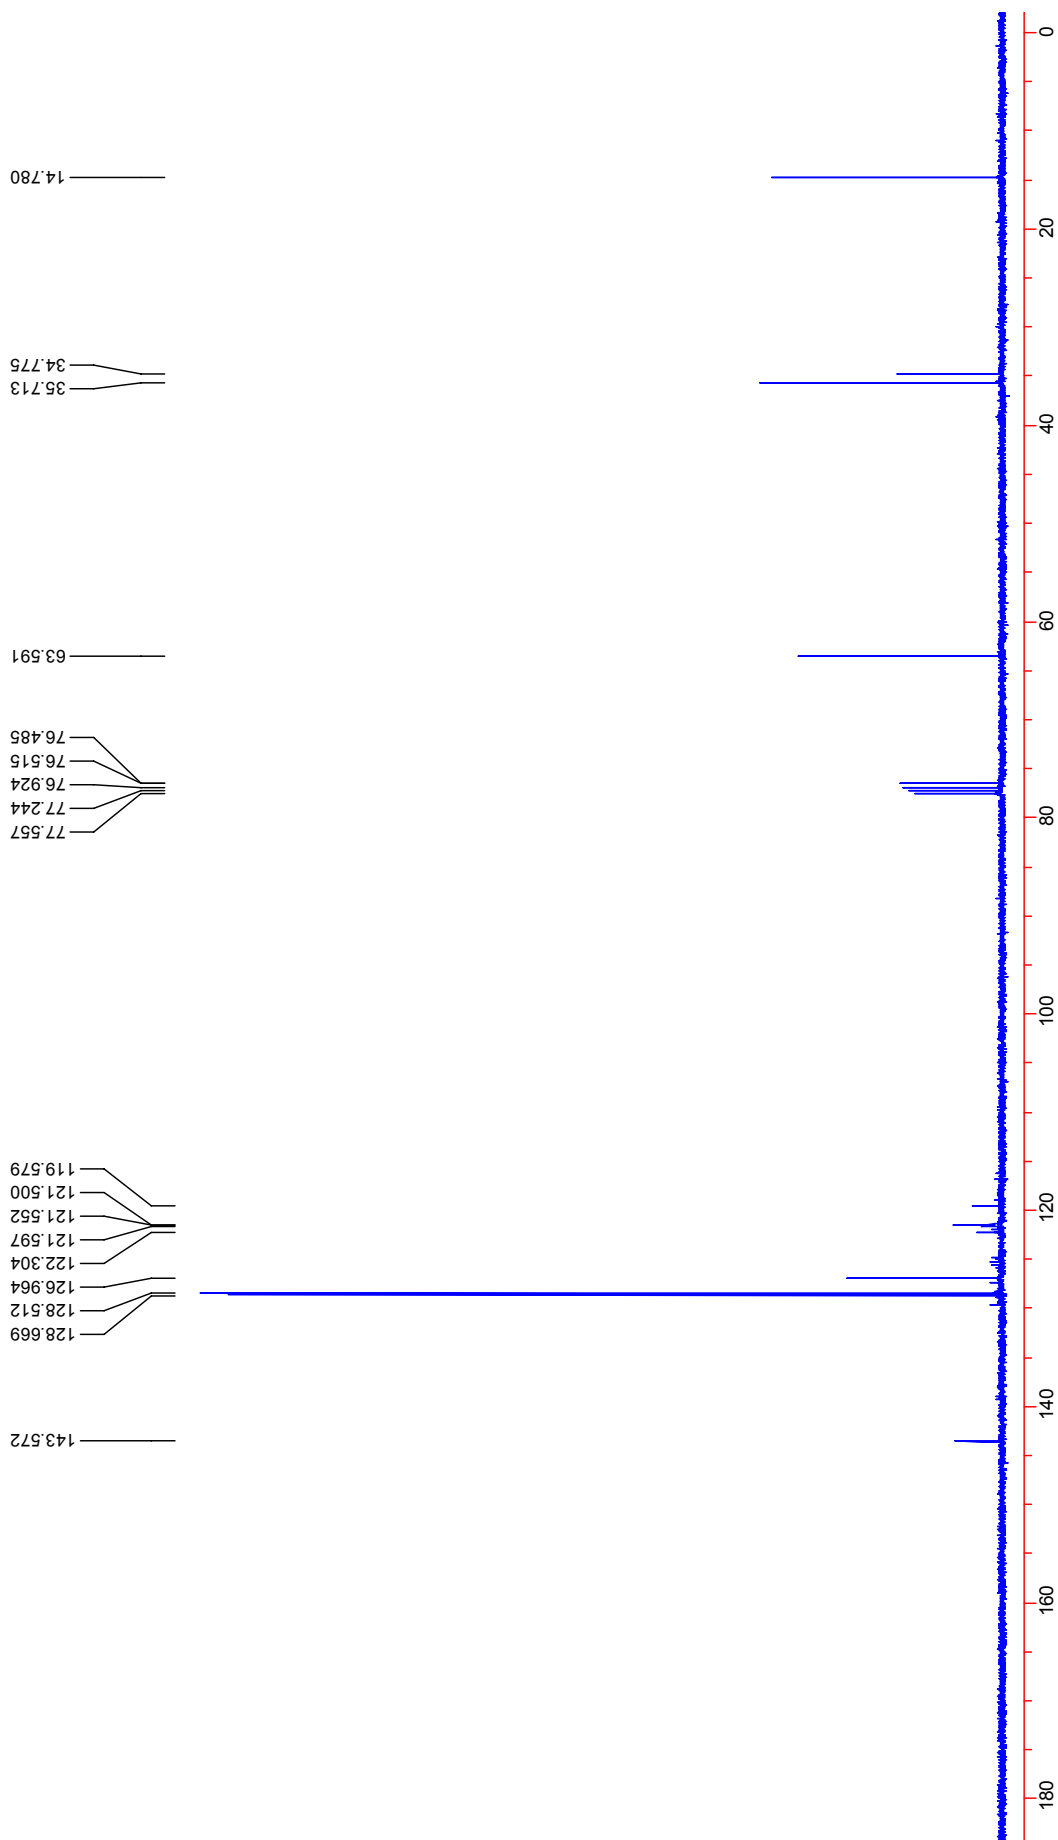

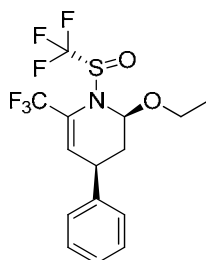

**4b-major endo**

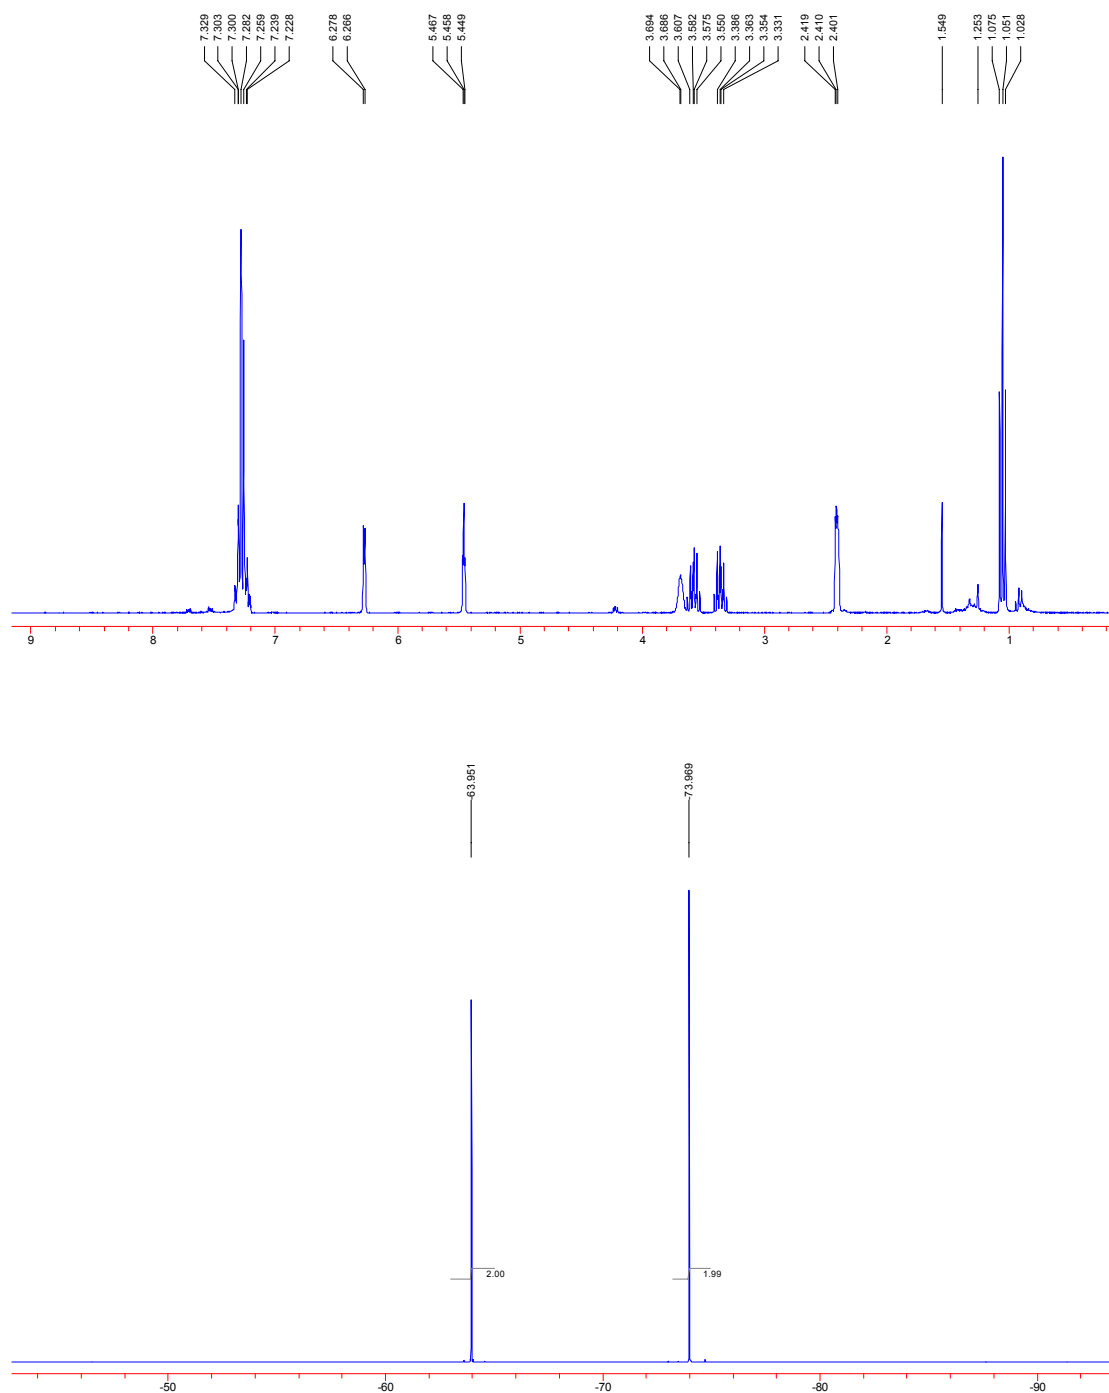

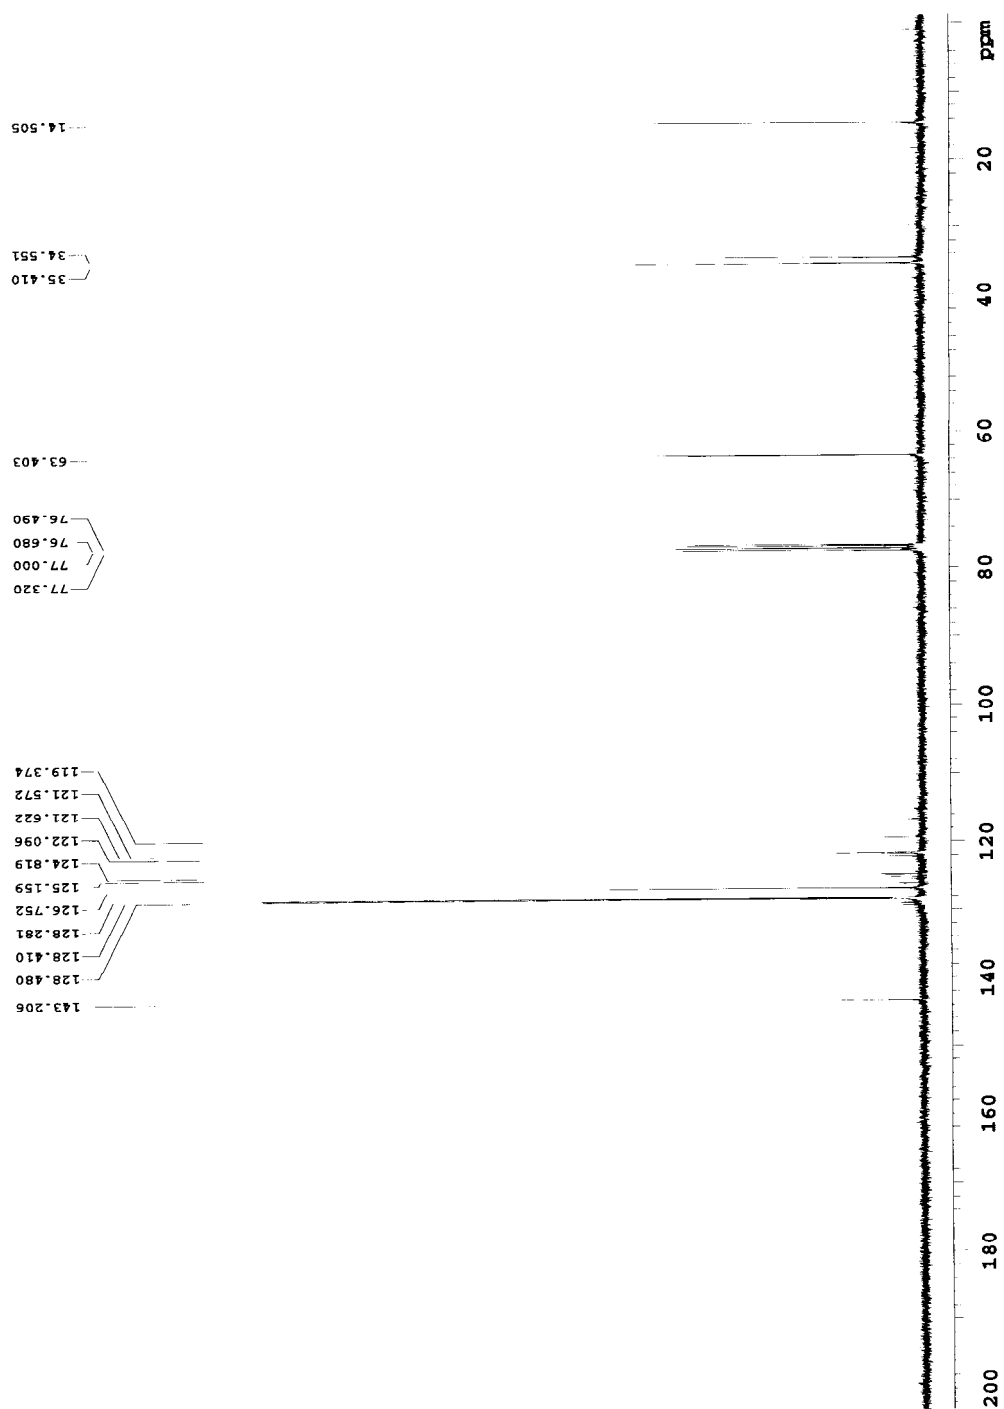

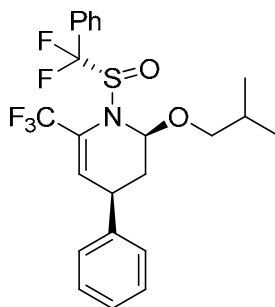

4c-major endo

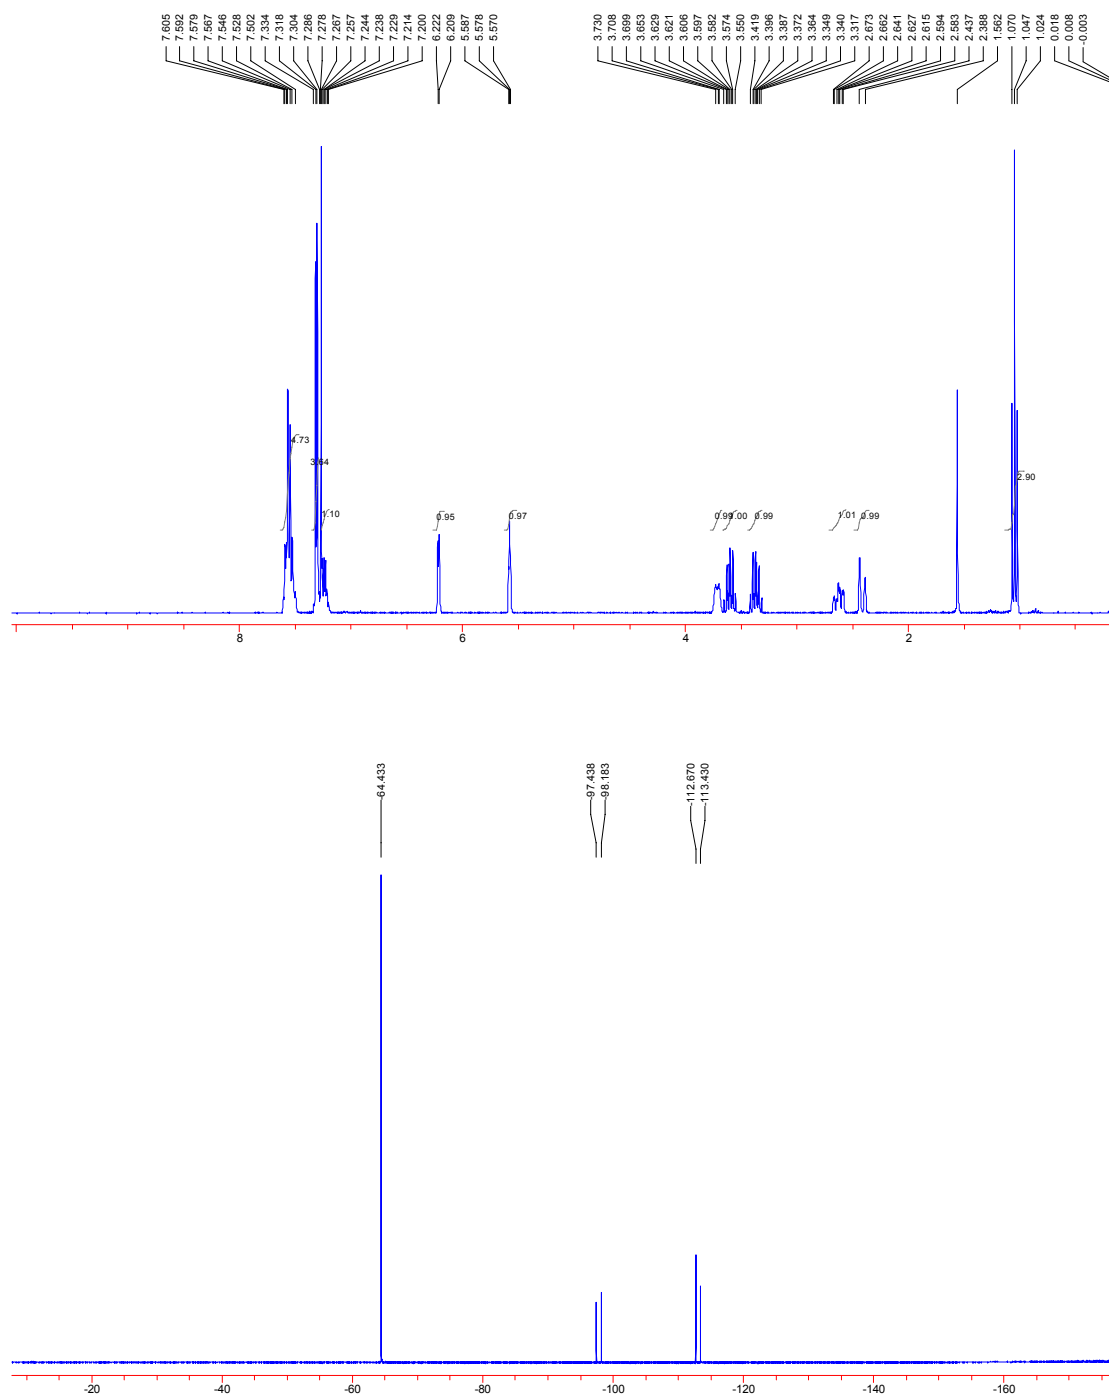

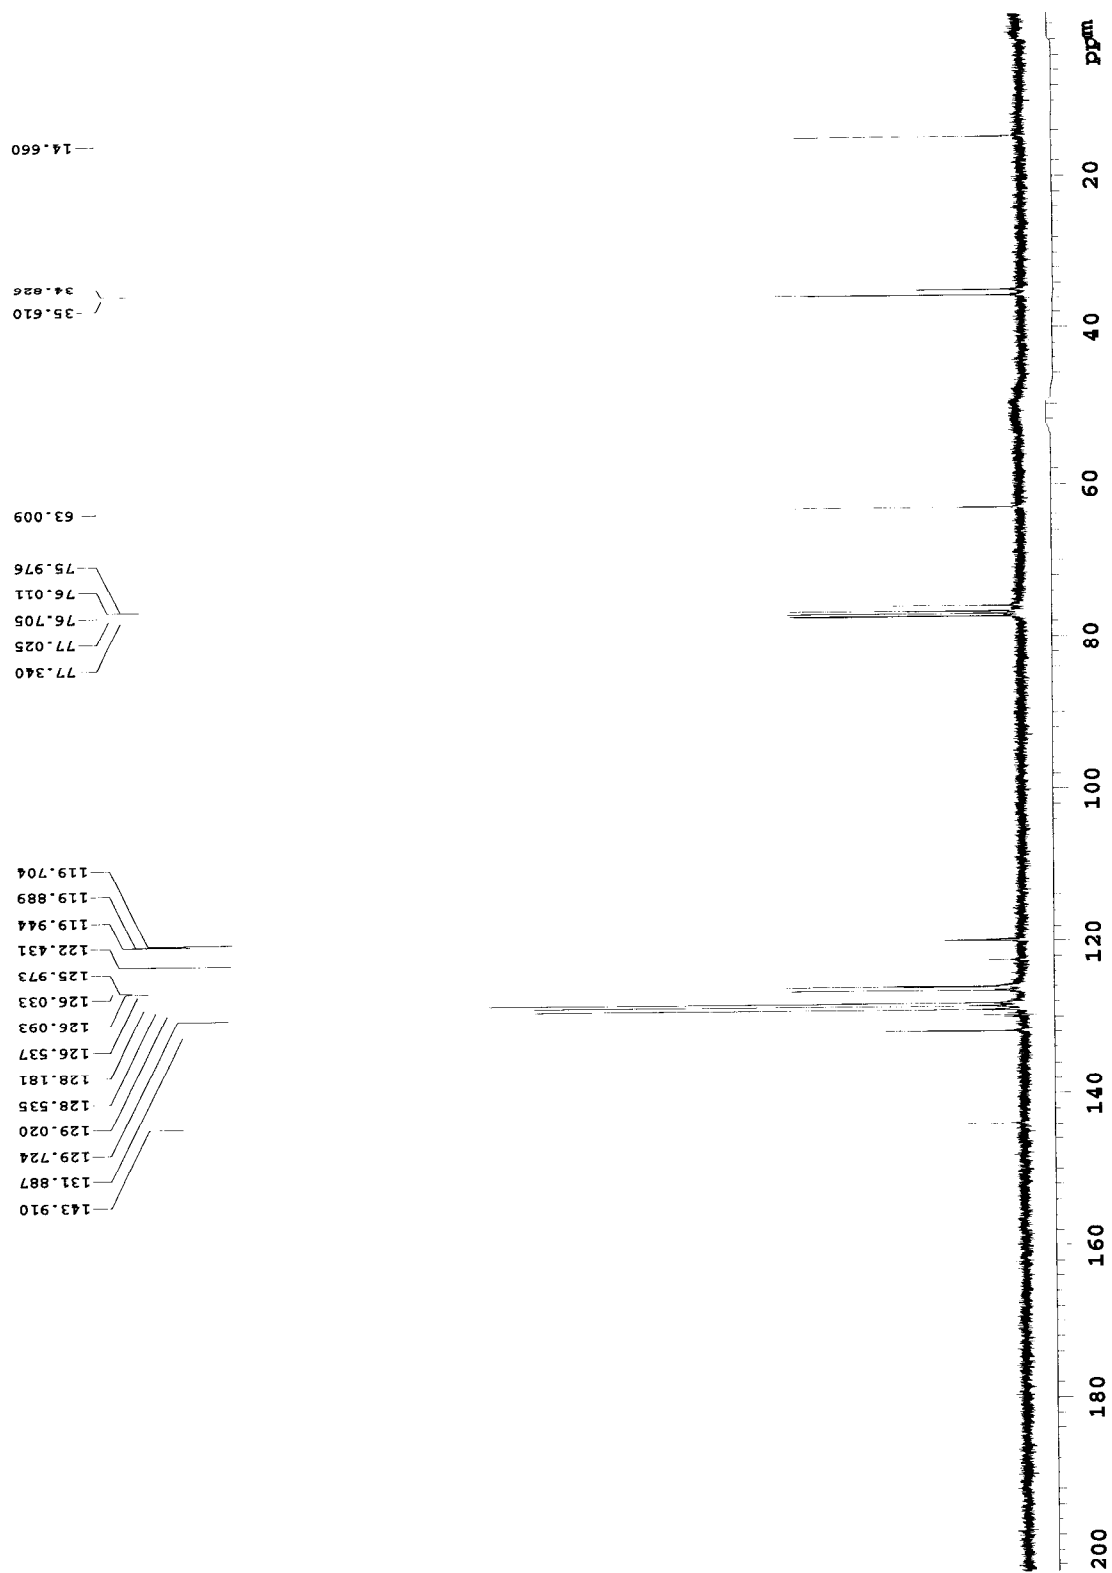



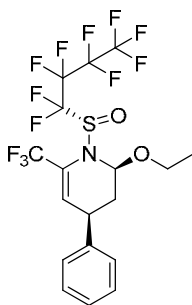

4d-major endo

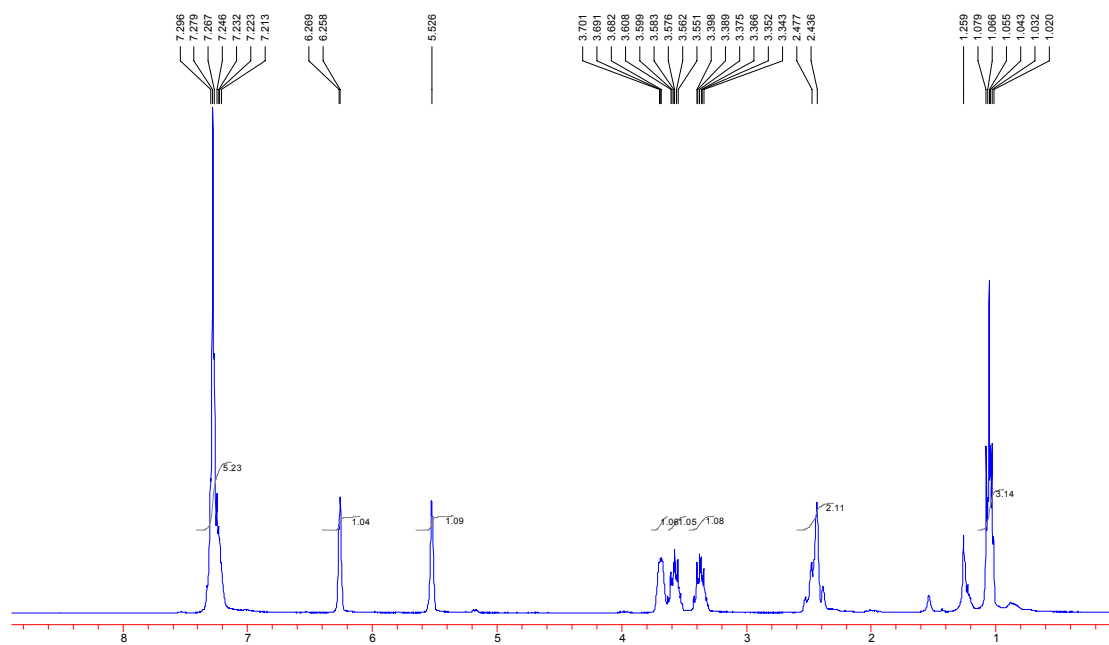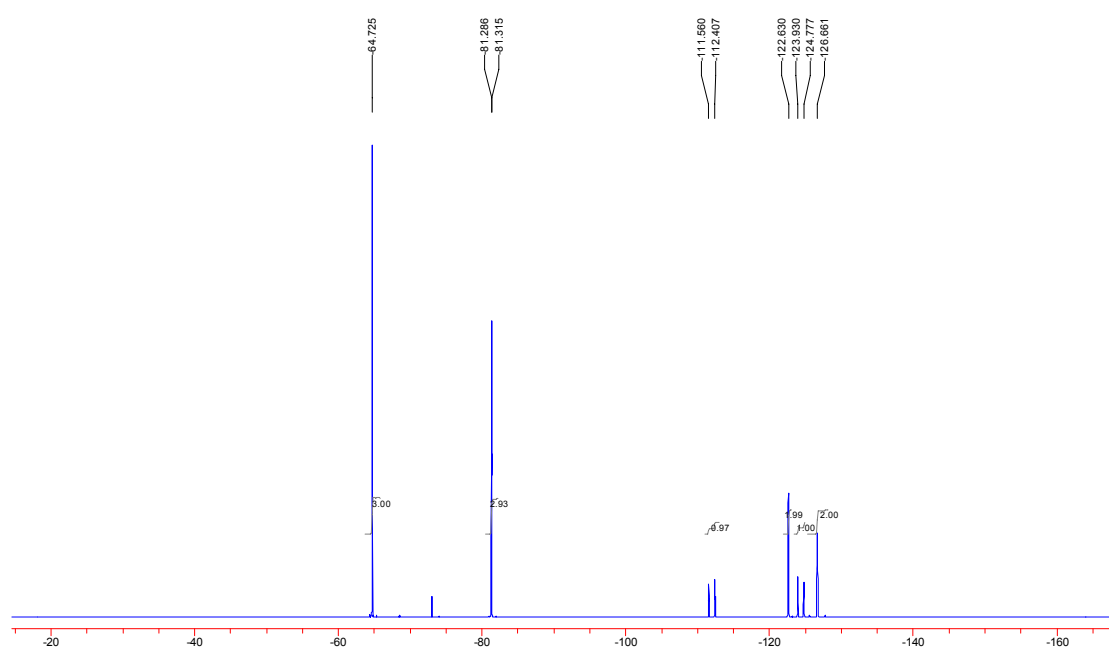

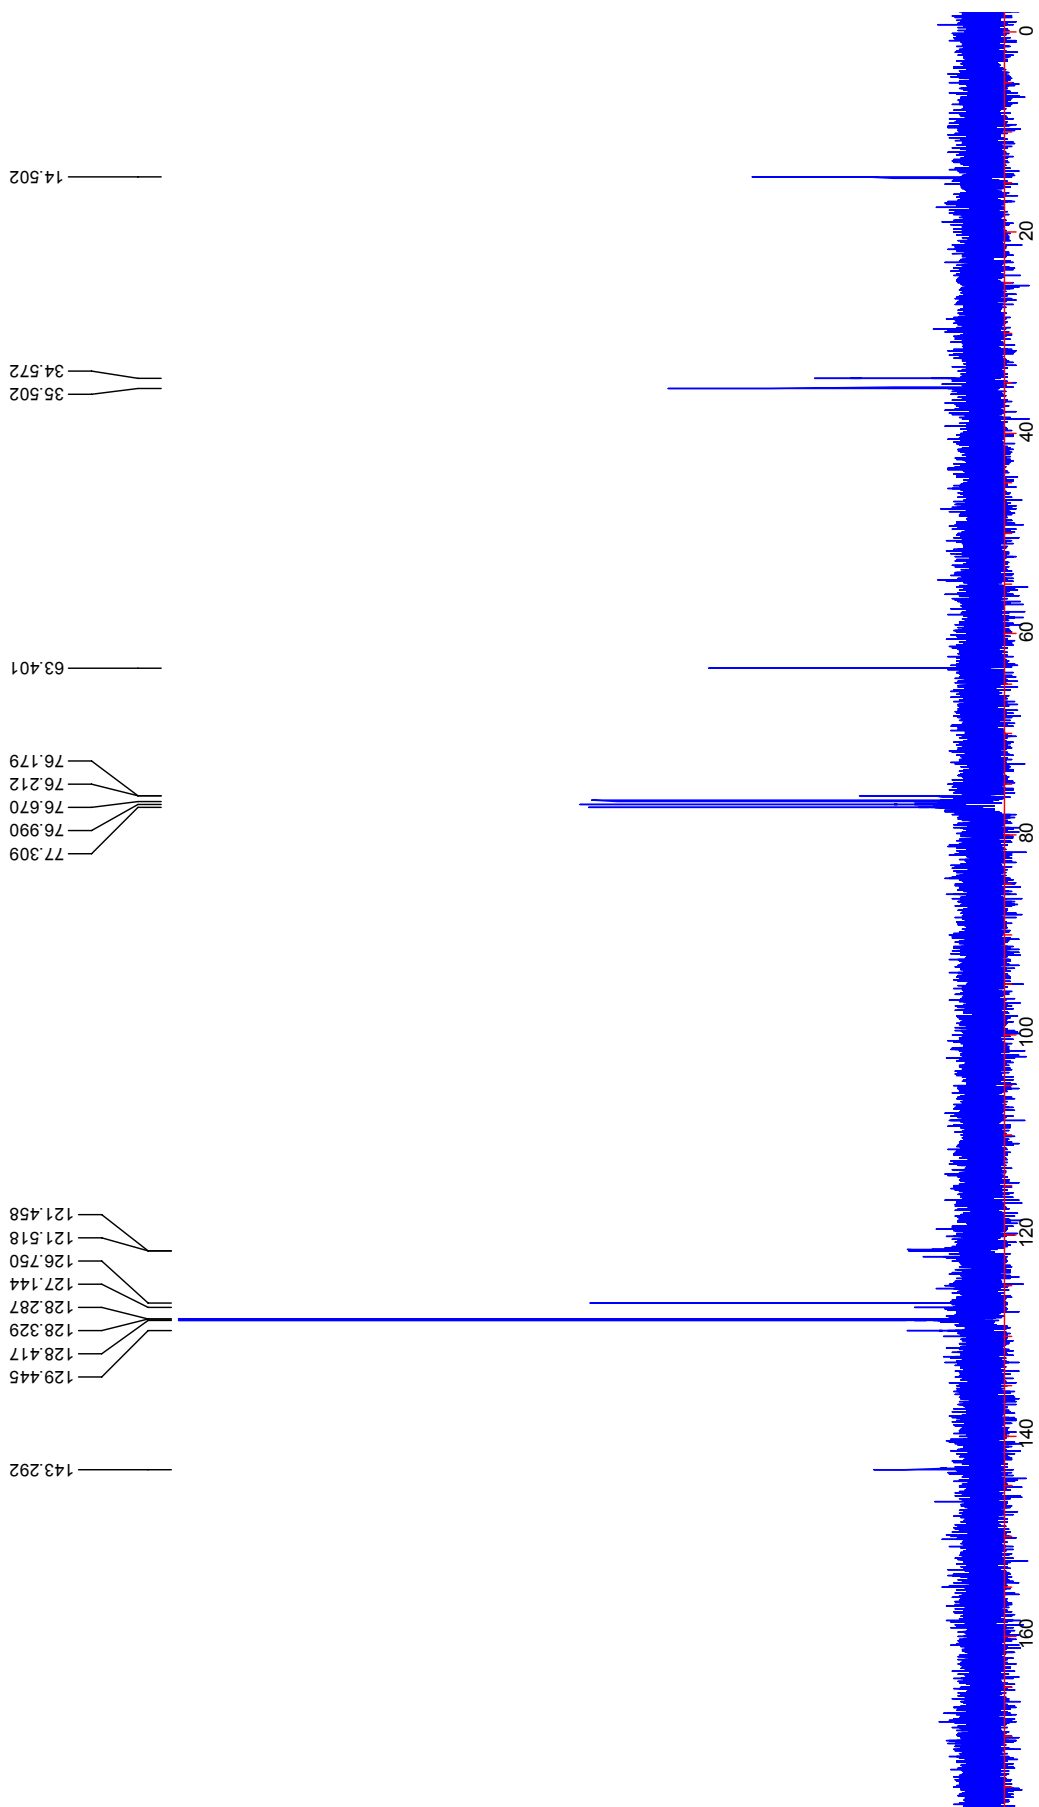

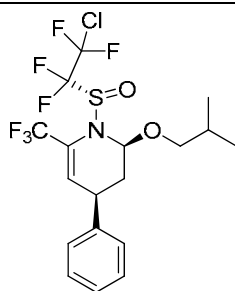

4e-major endo

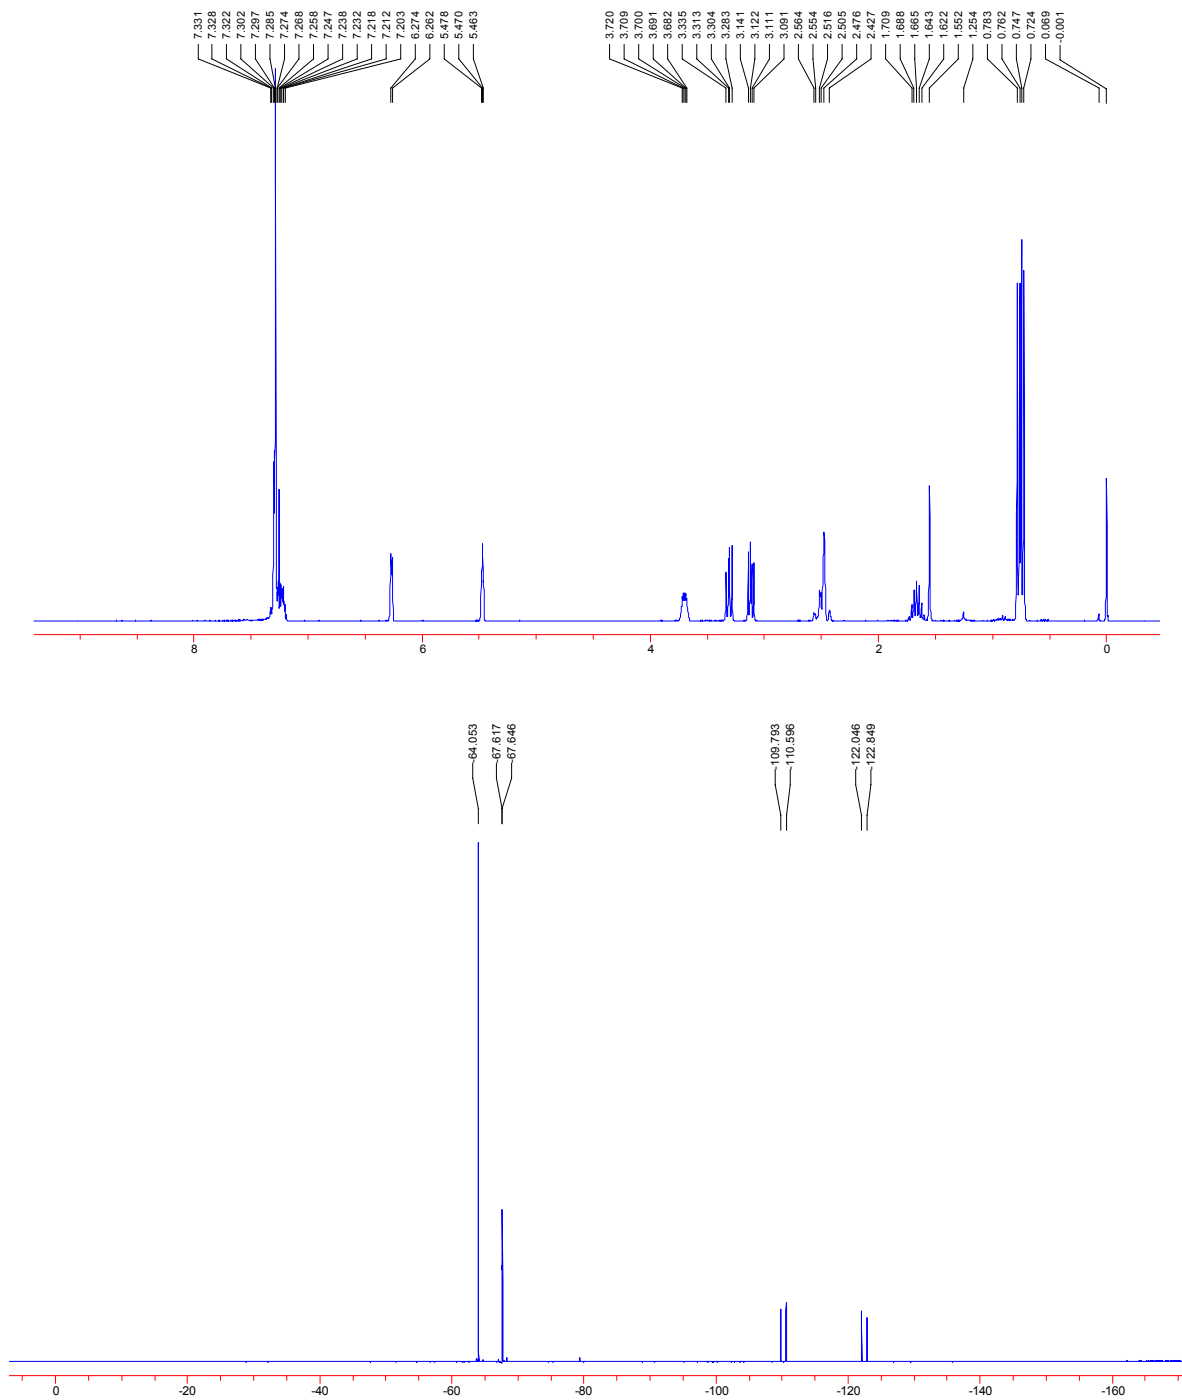

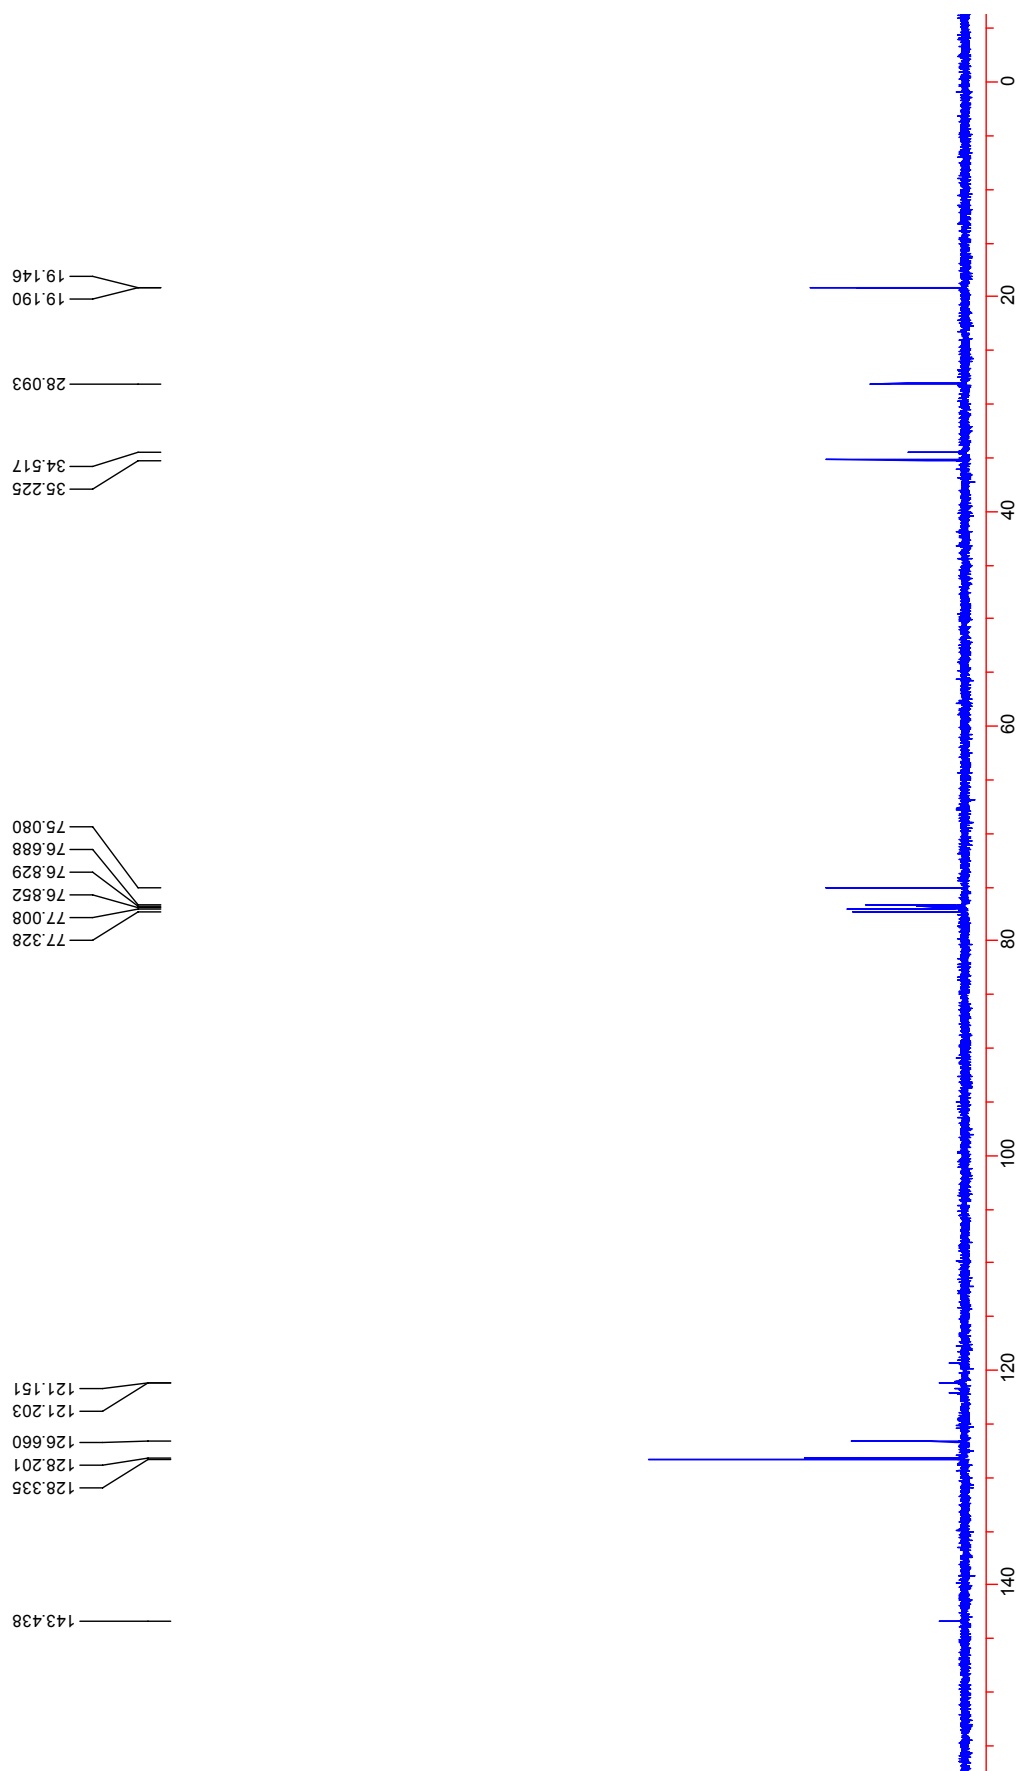

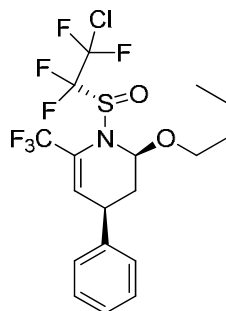

4f- major endo

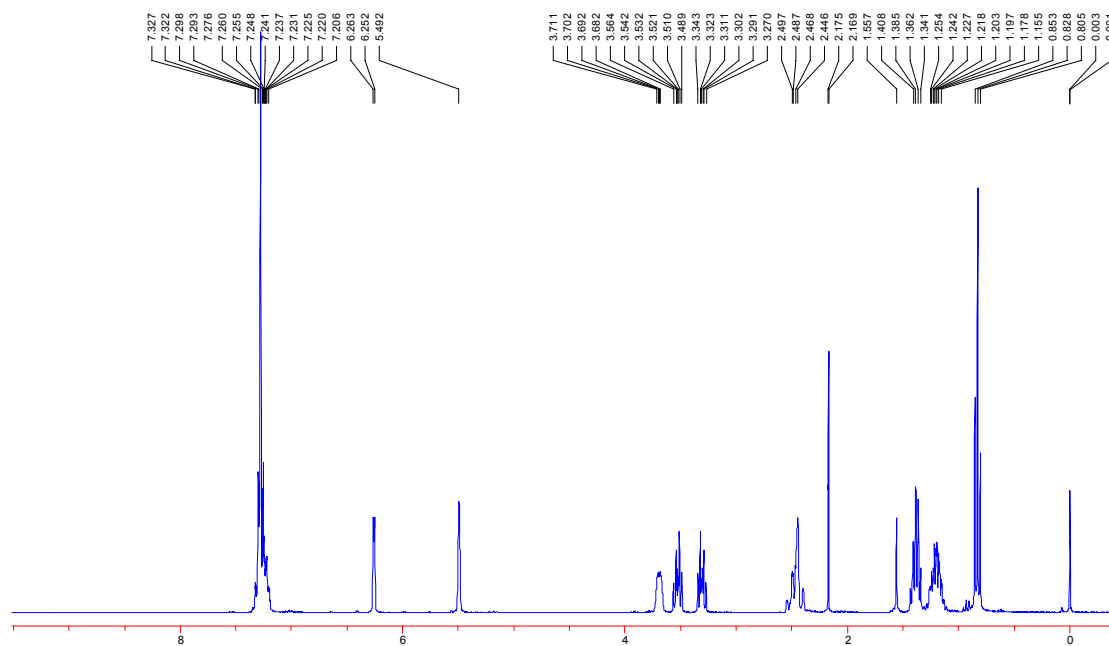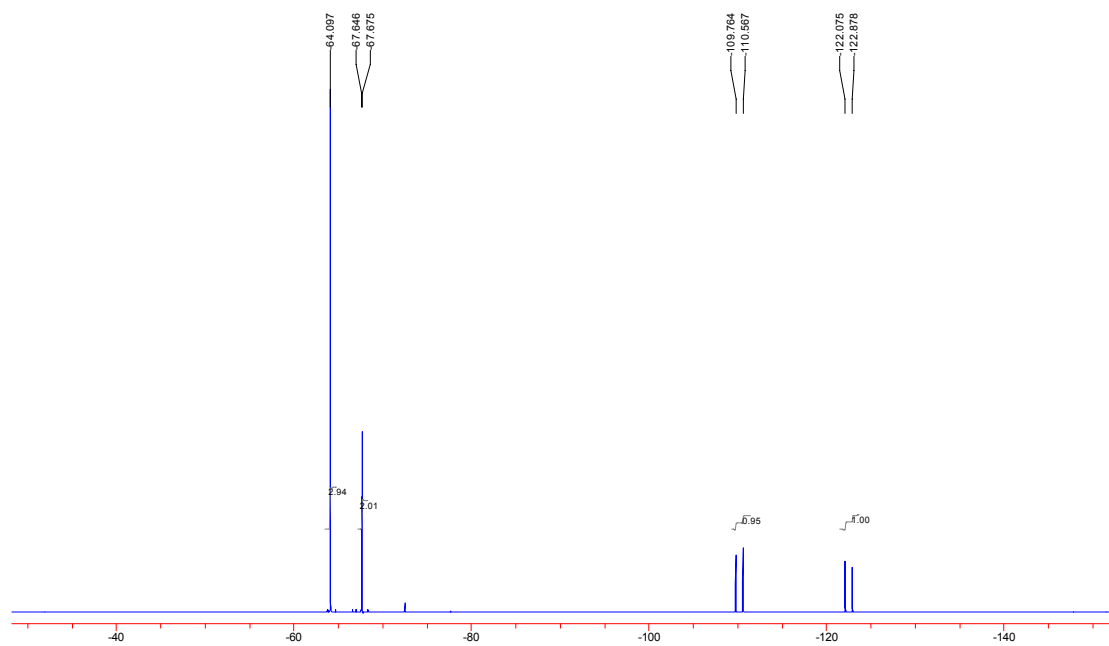

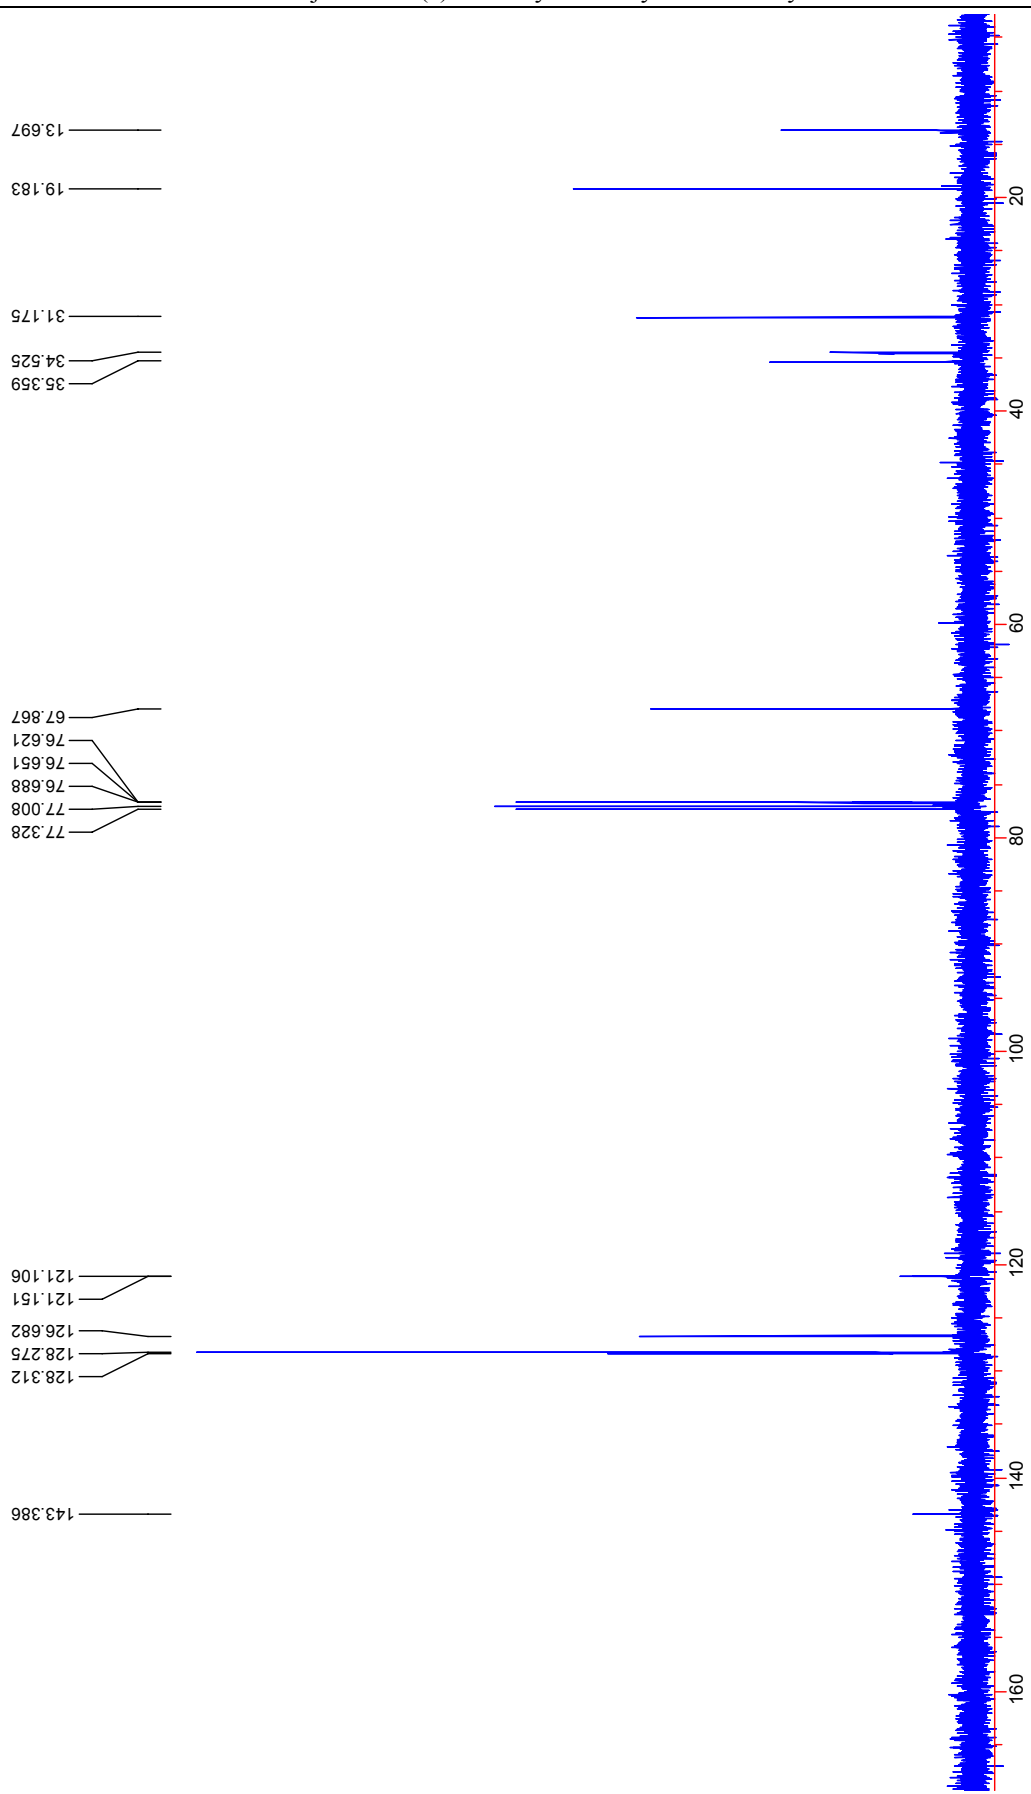

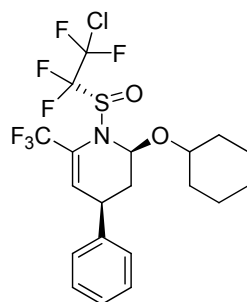

4g- major endo

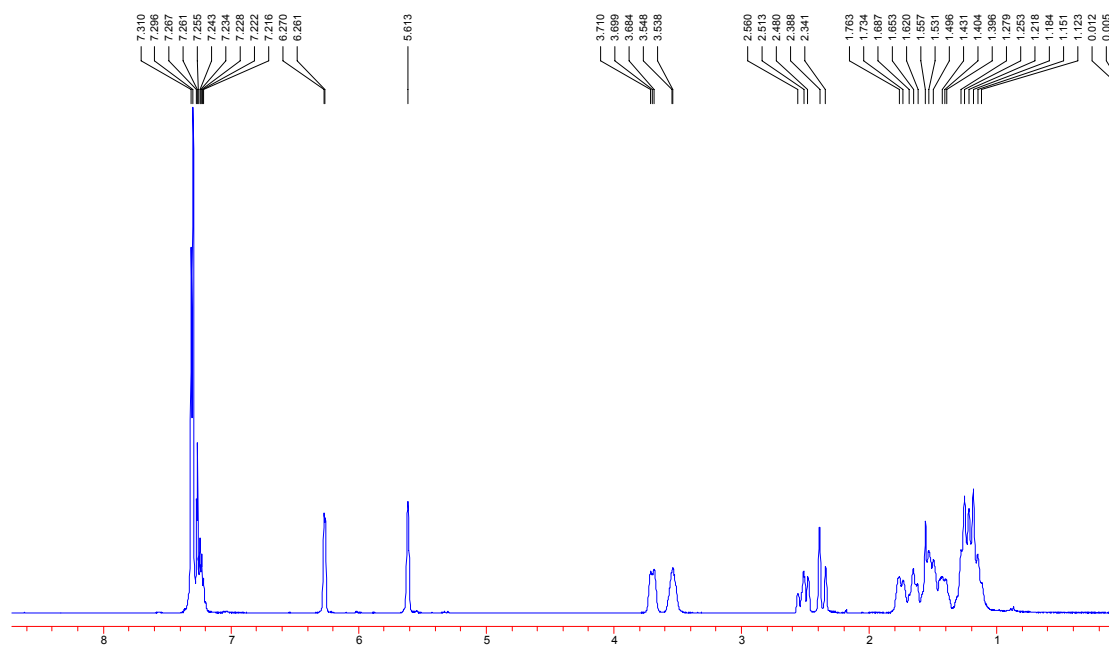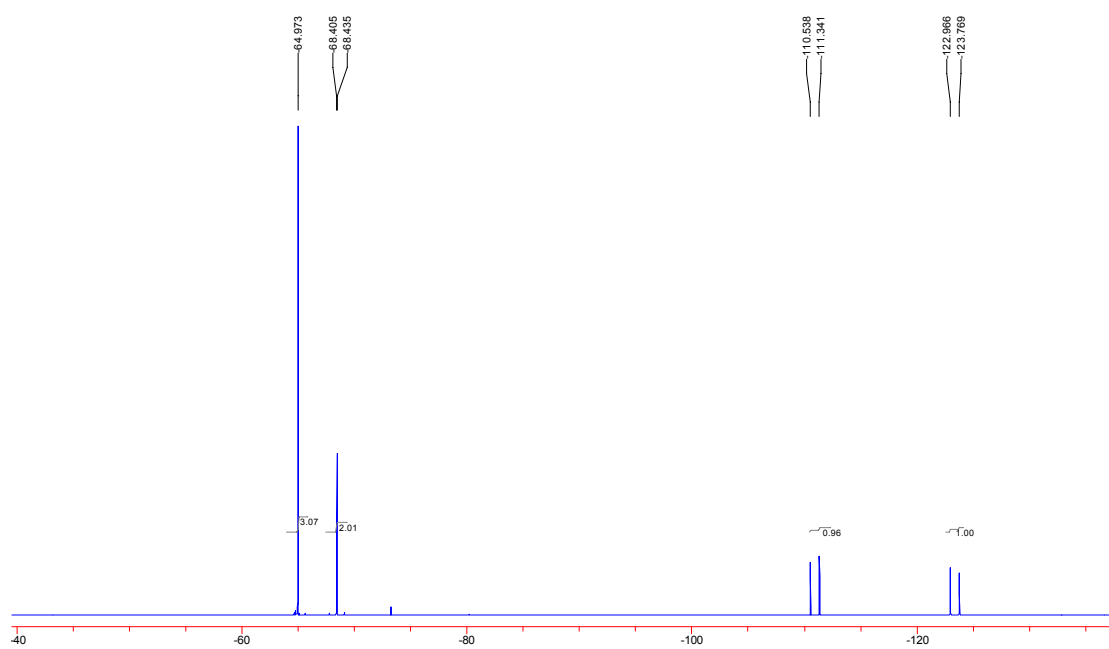

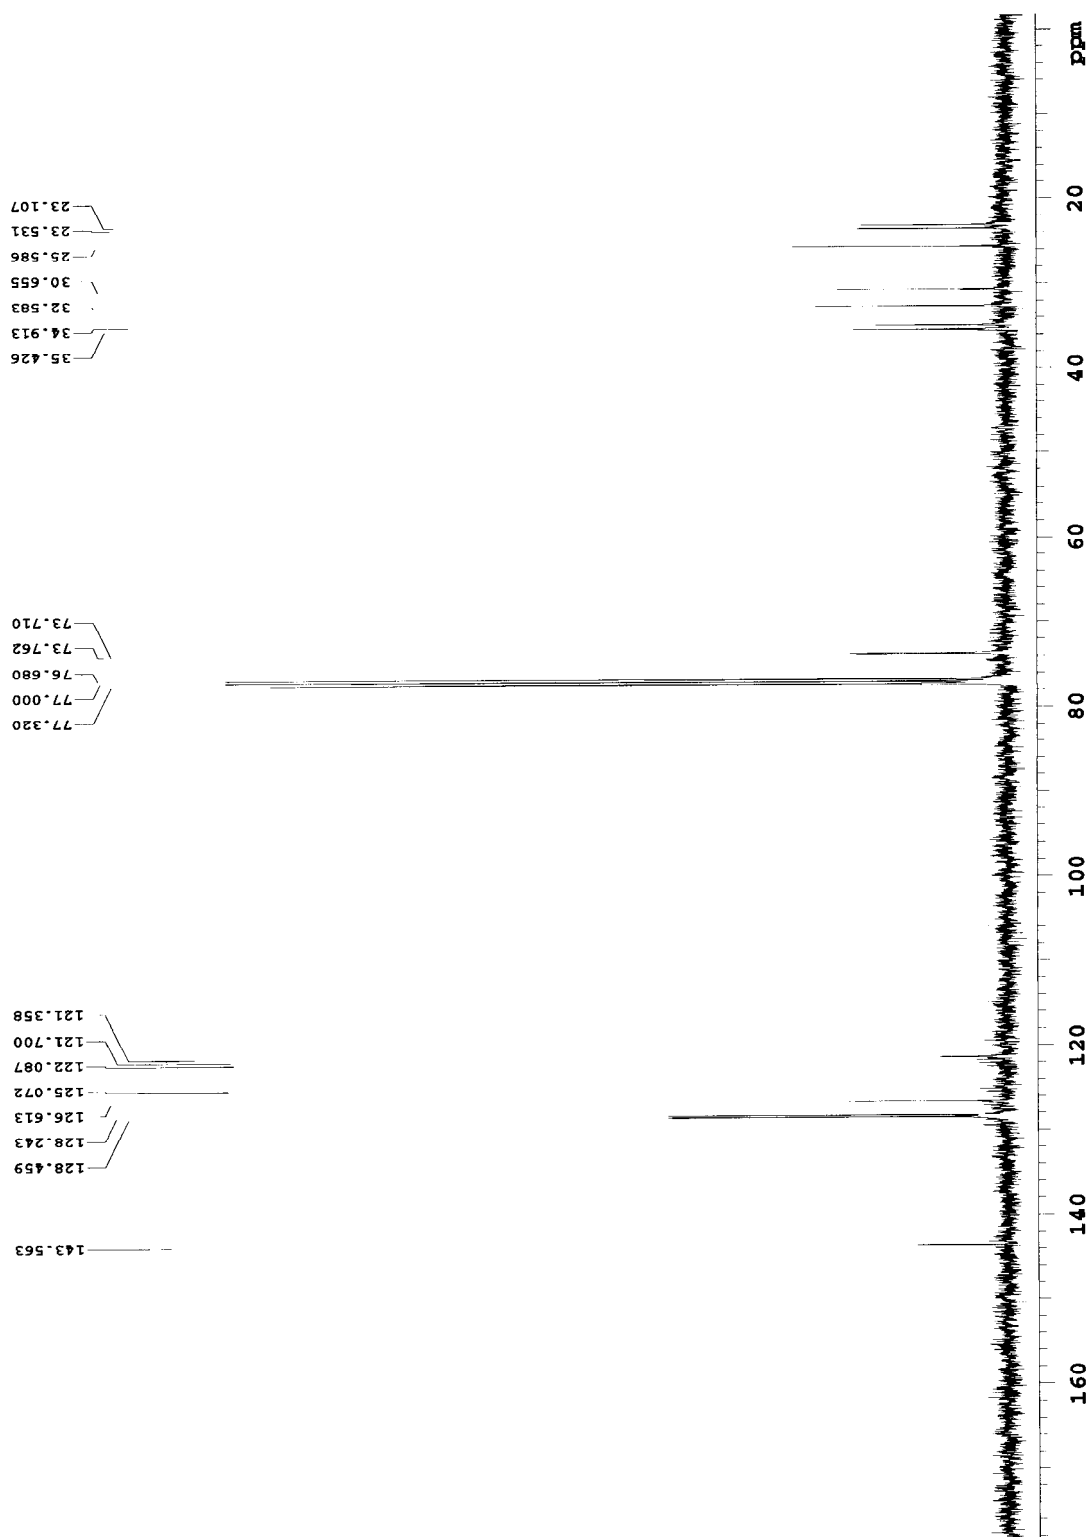



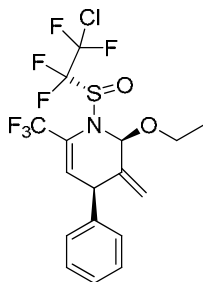

4h-endo

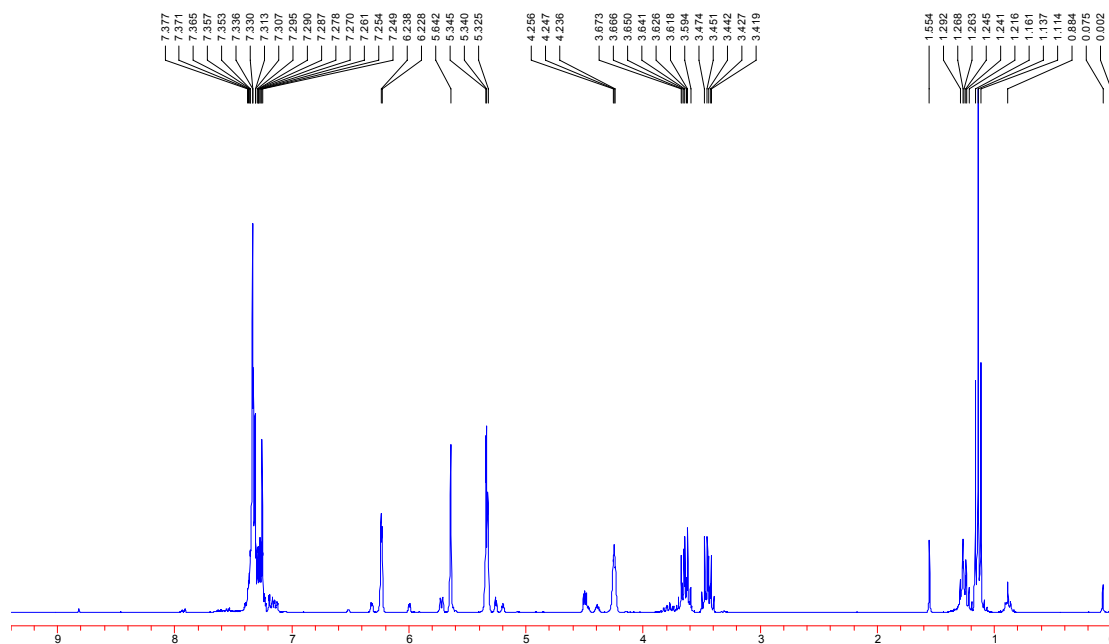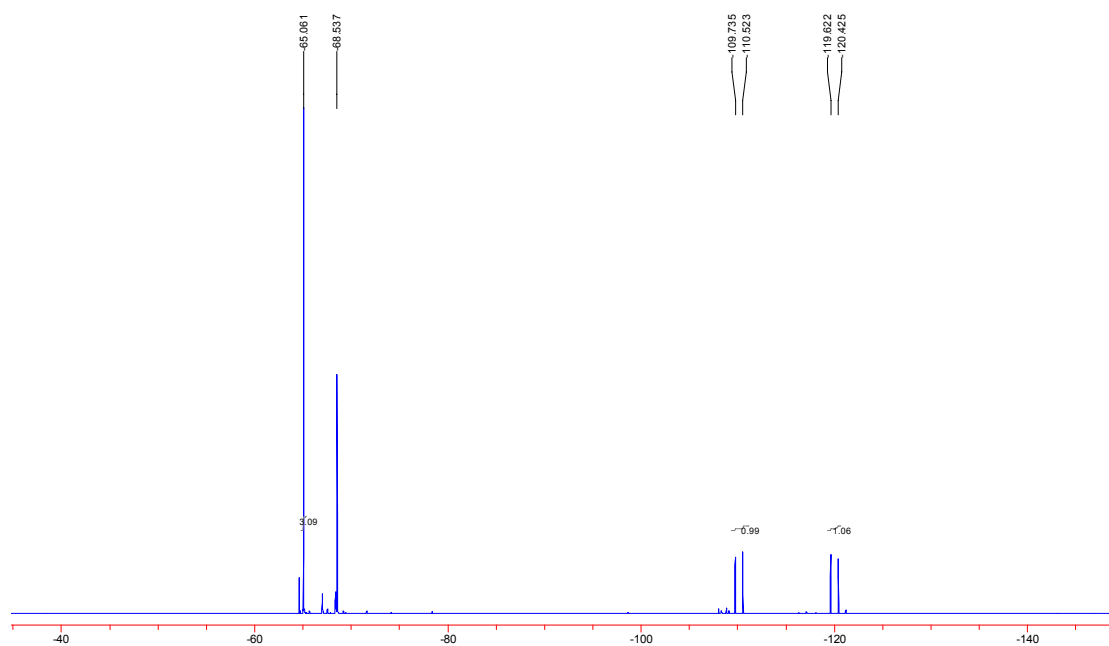

13C NMR

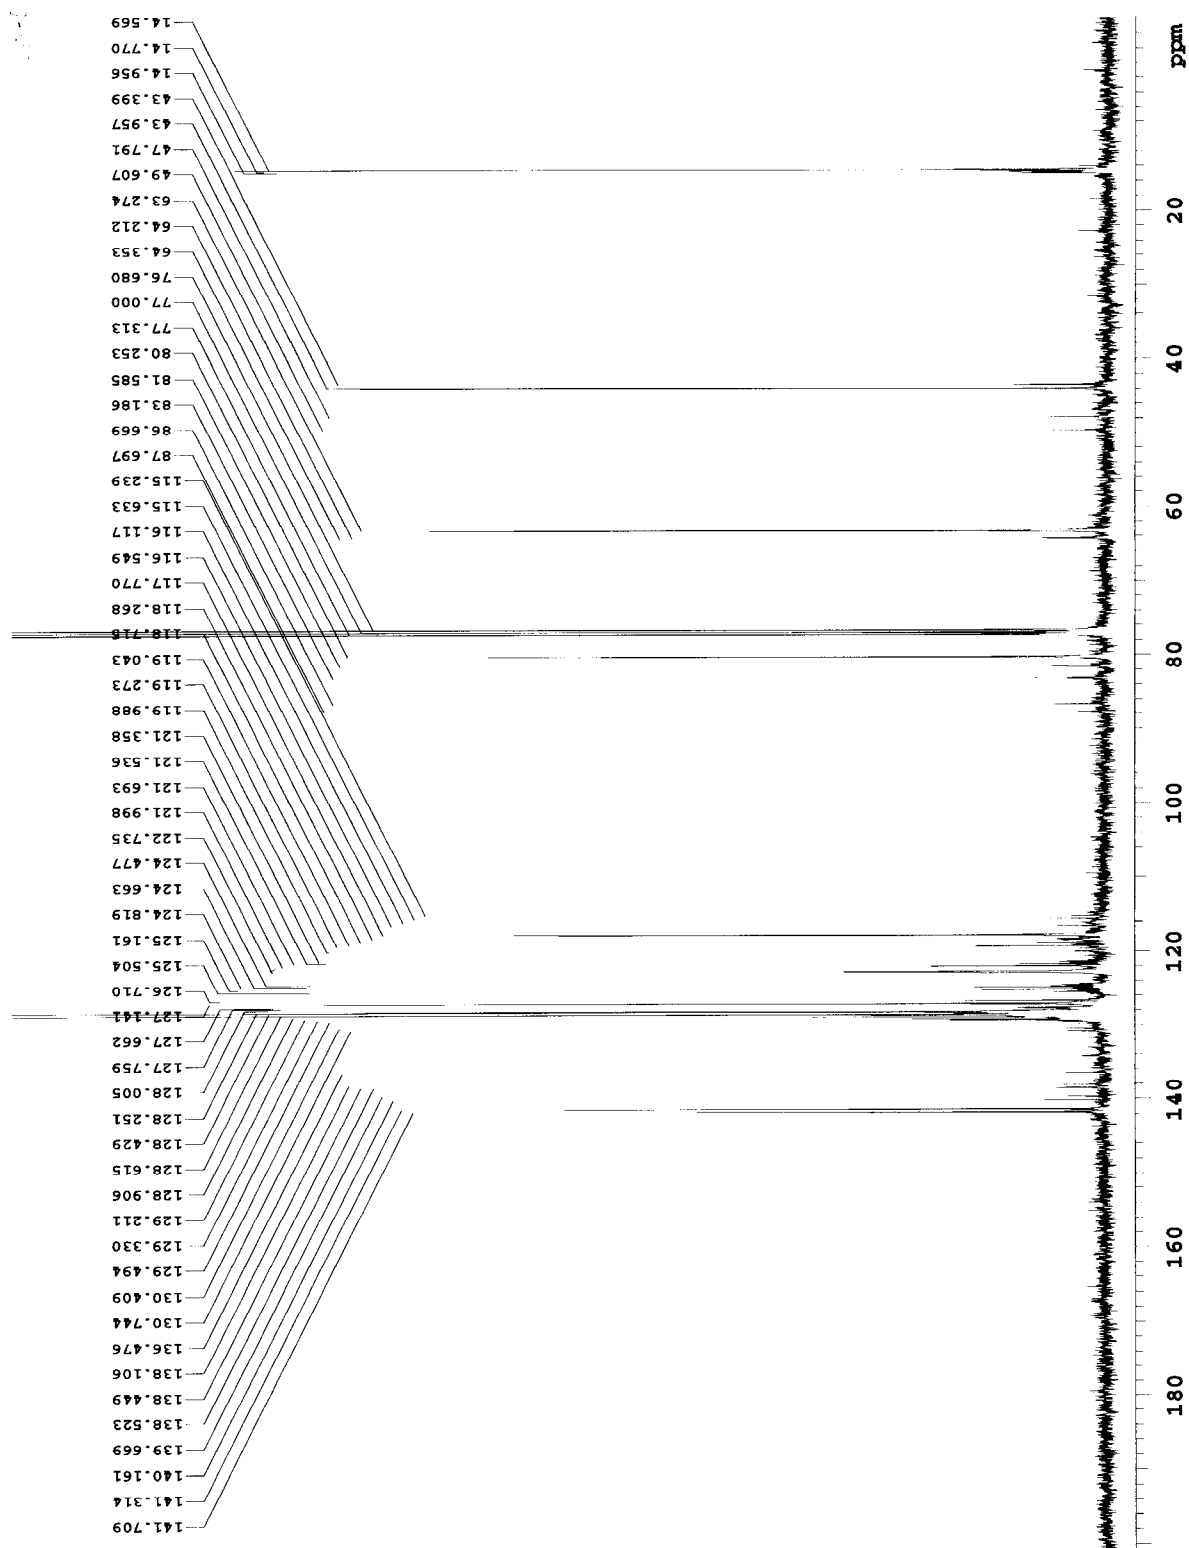

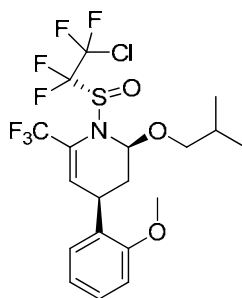

4j-major endo

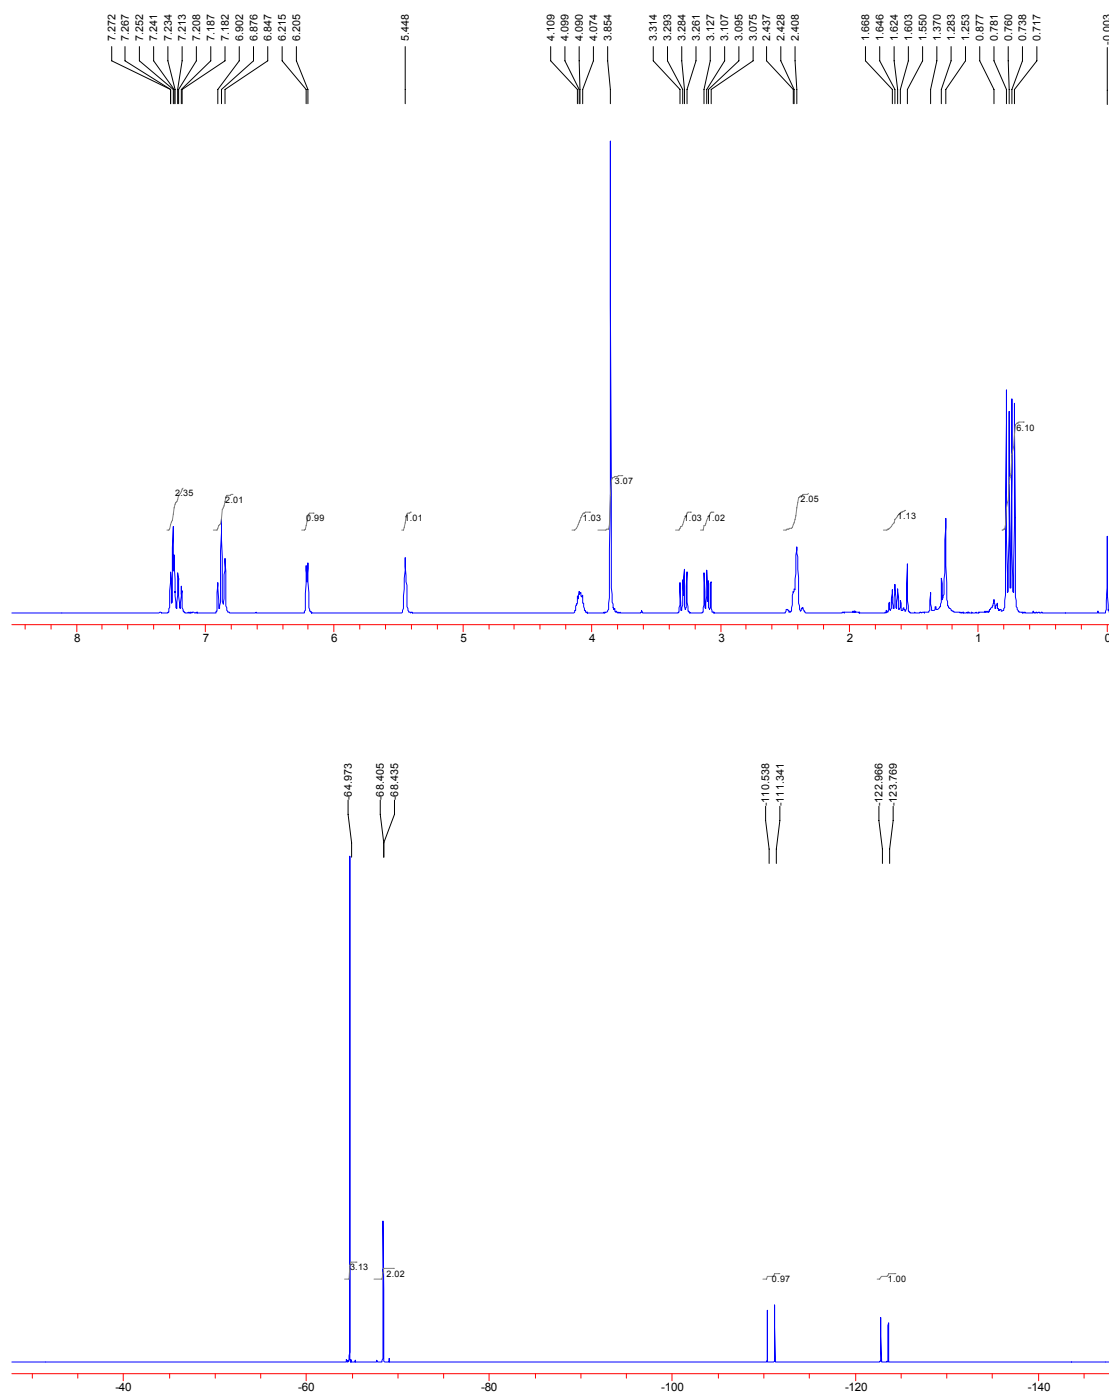

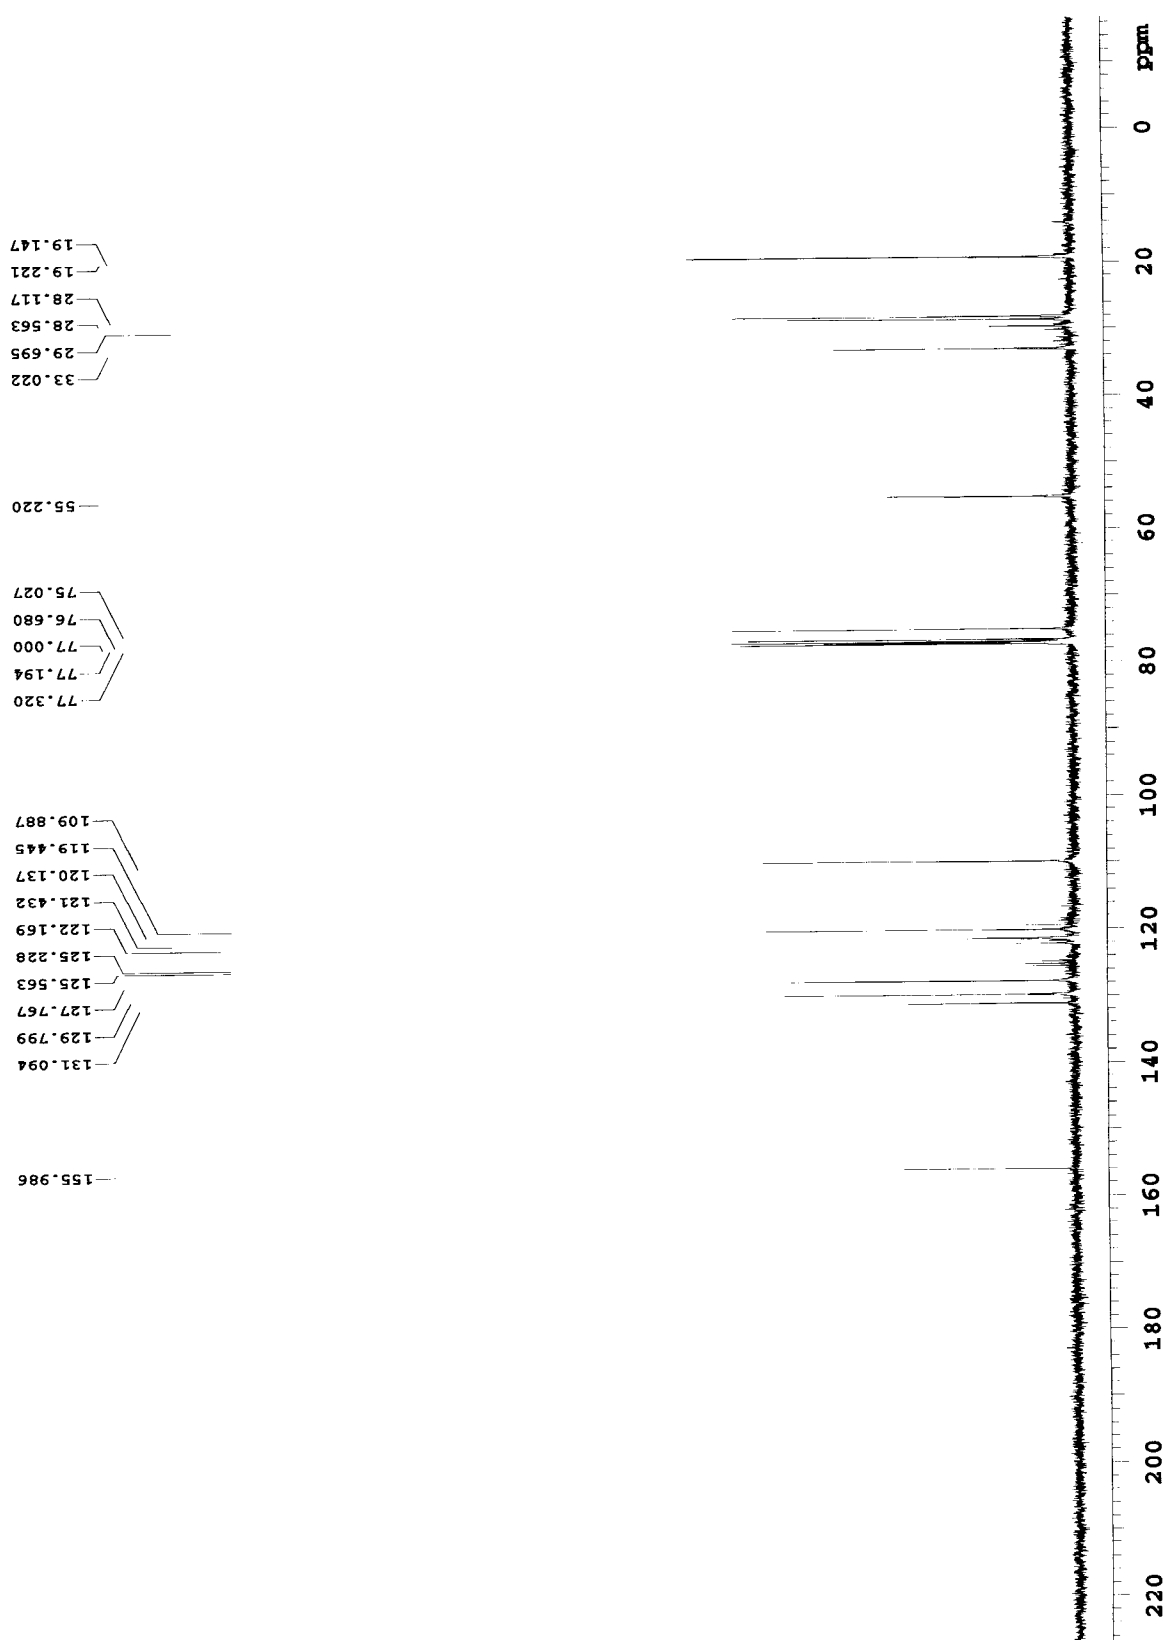

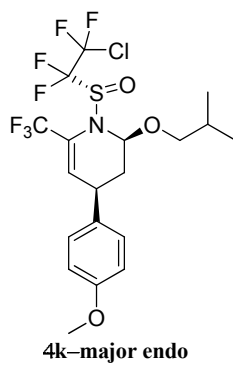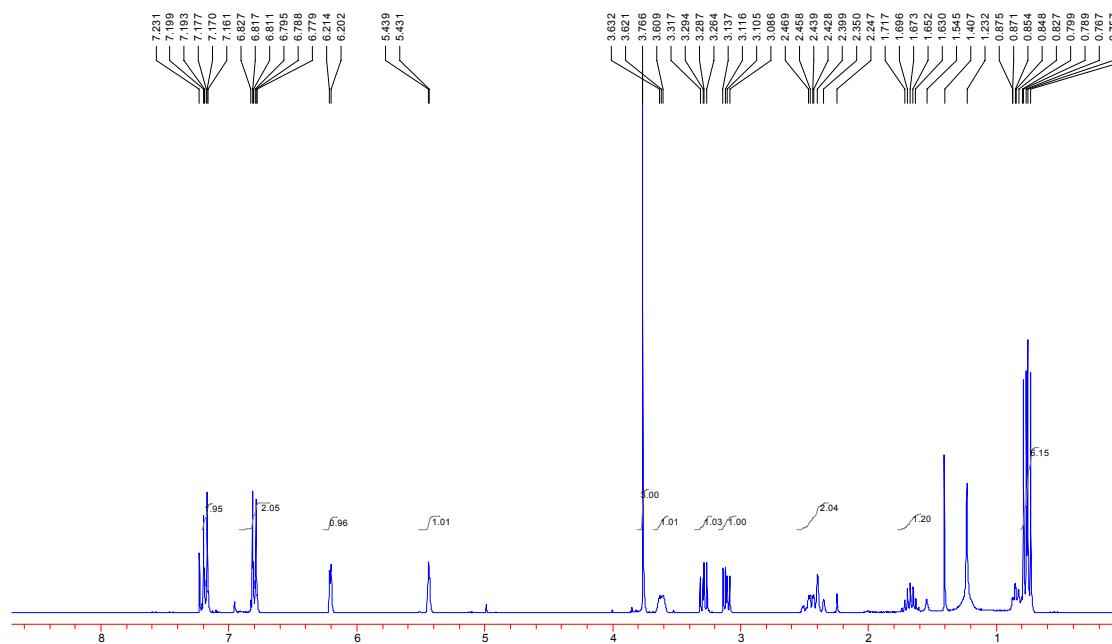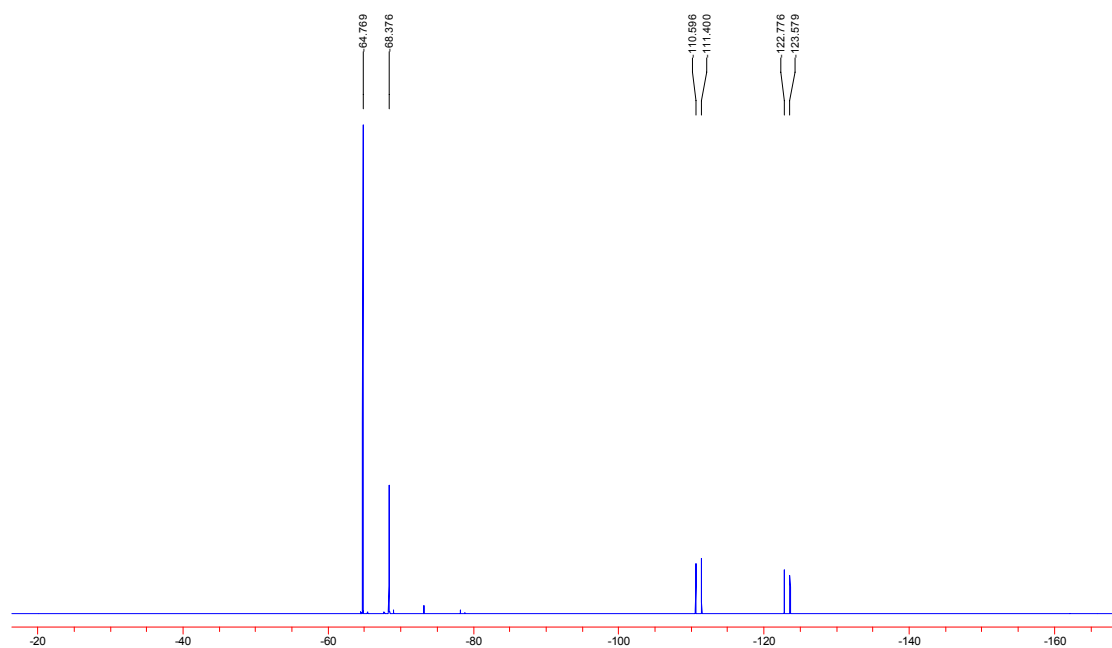

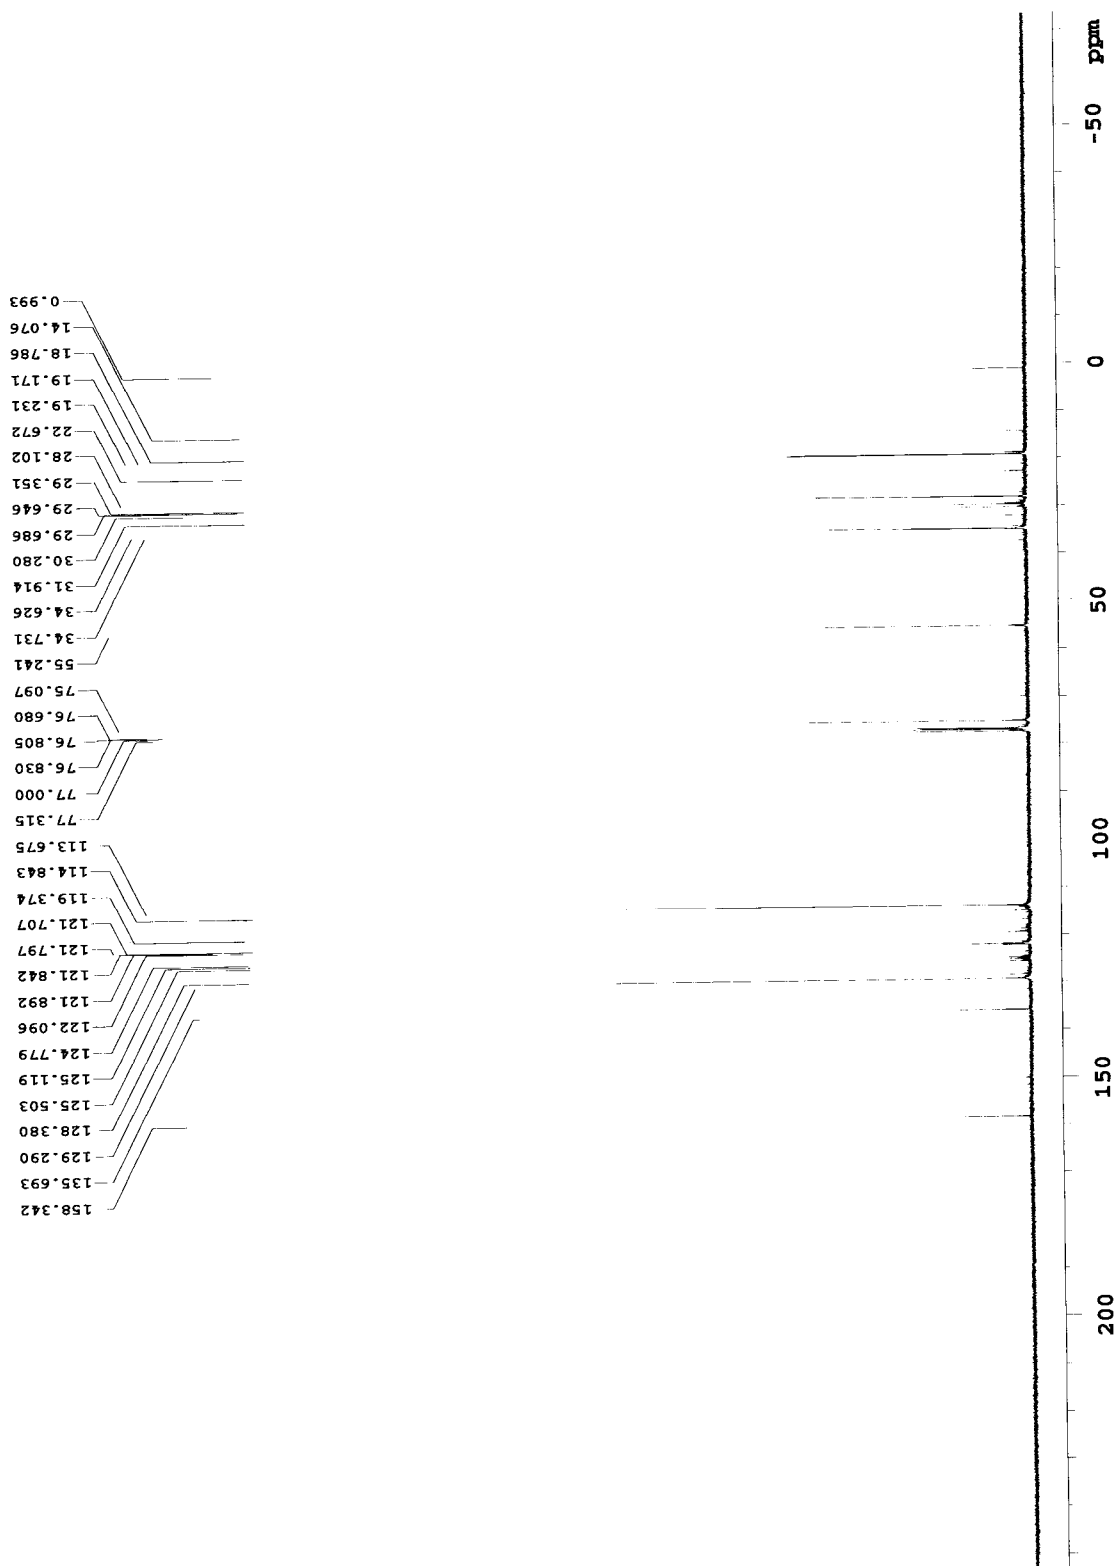

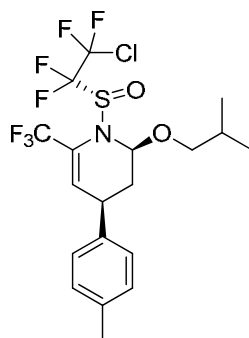

4l-major endo

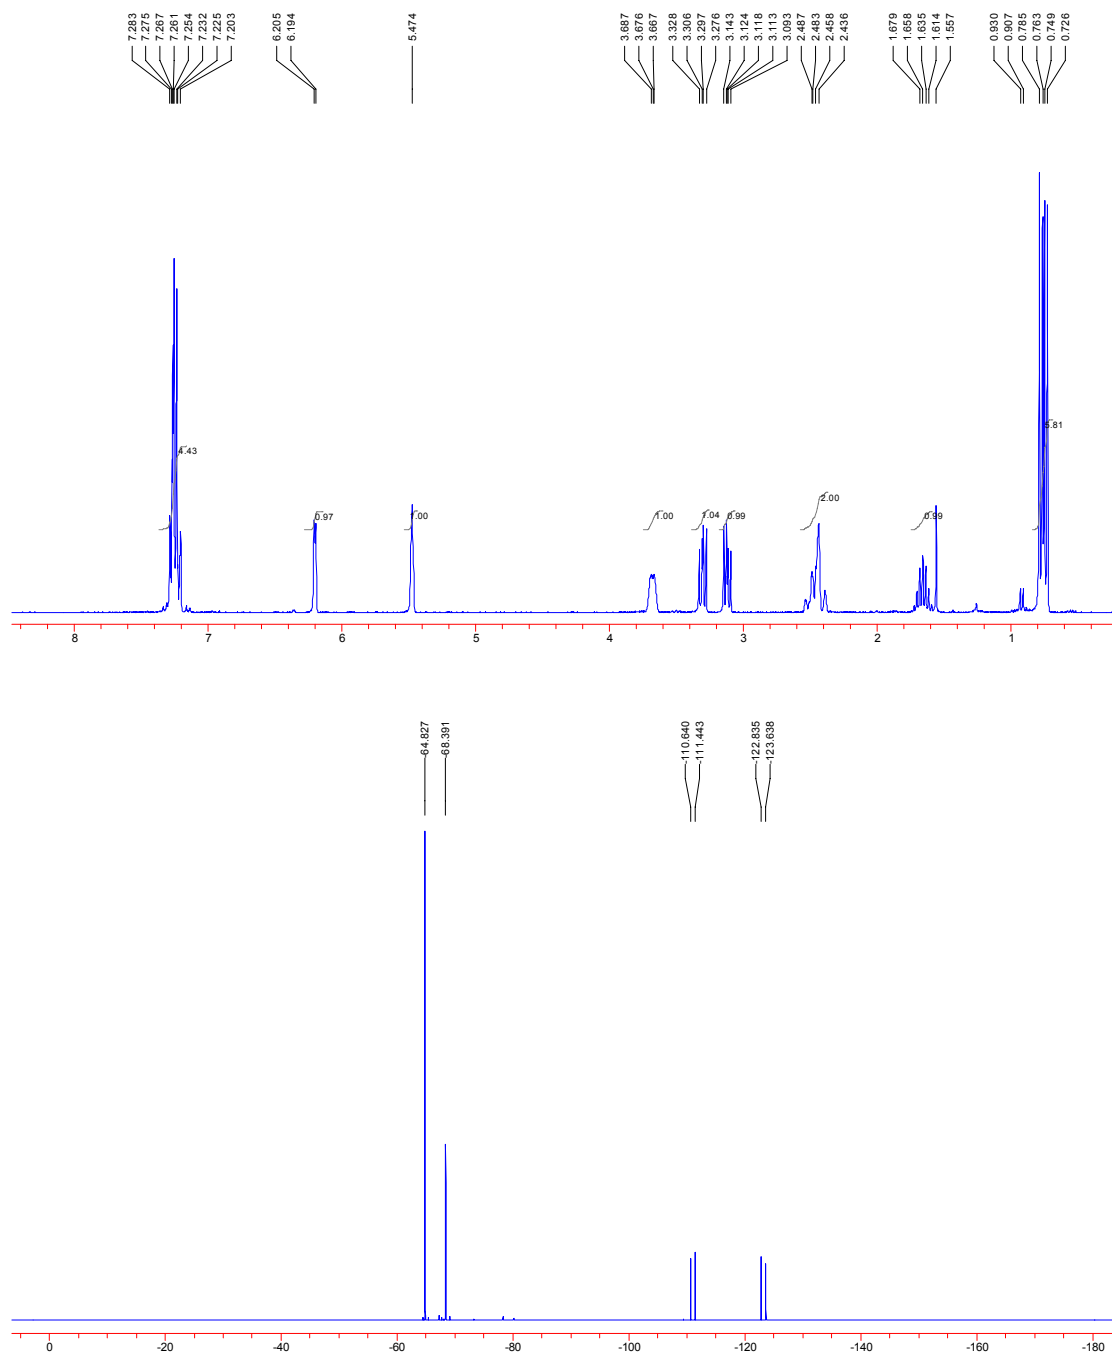

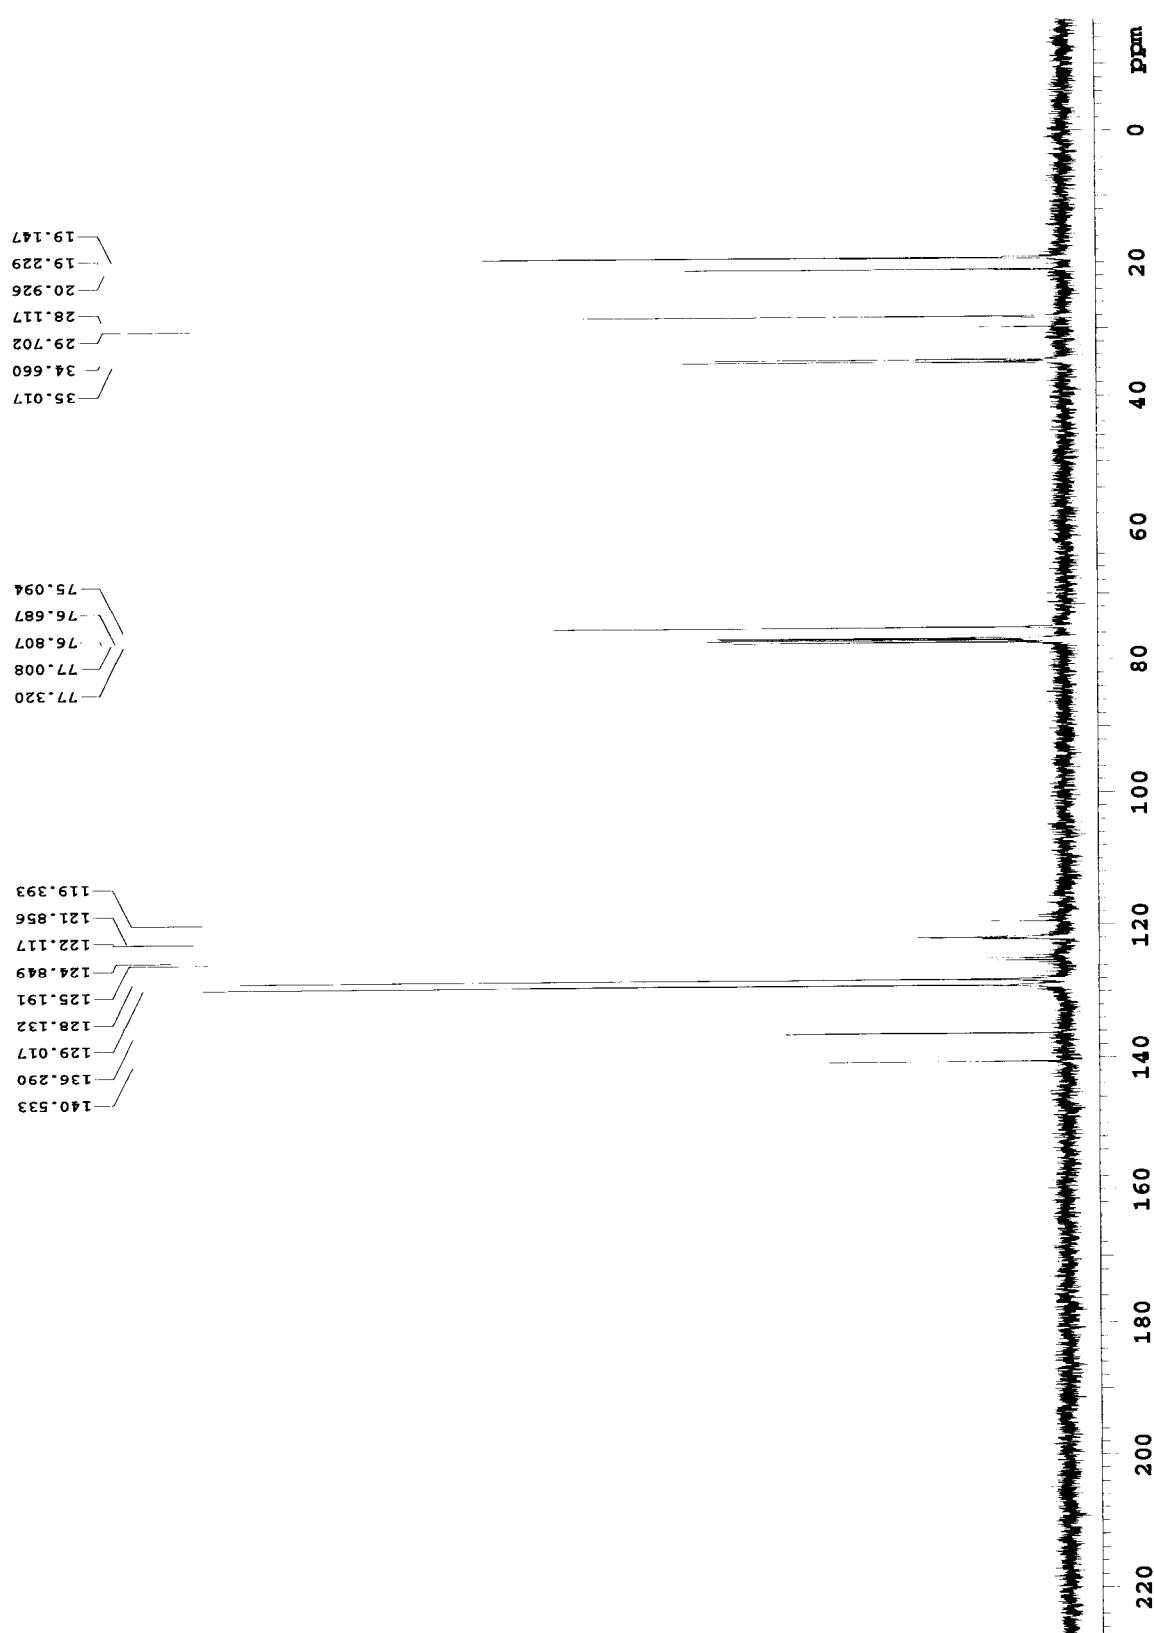



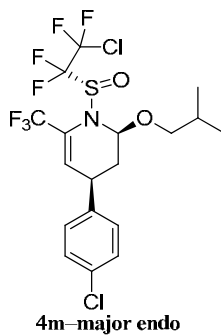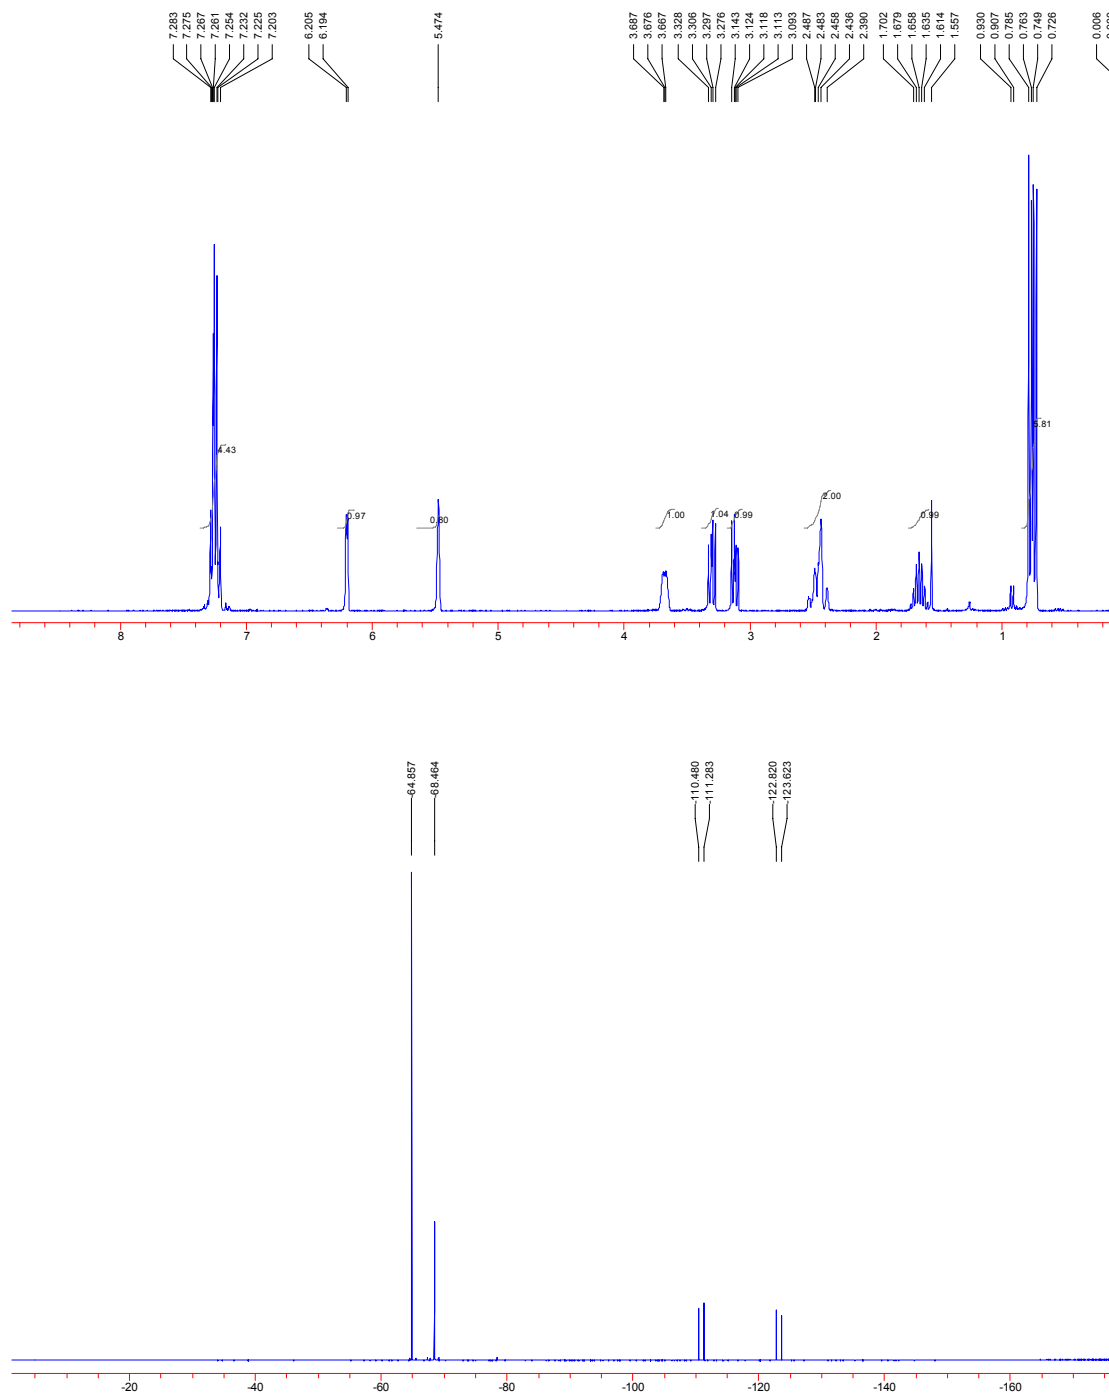

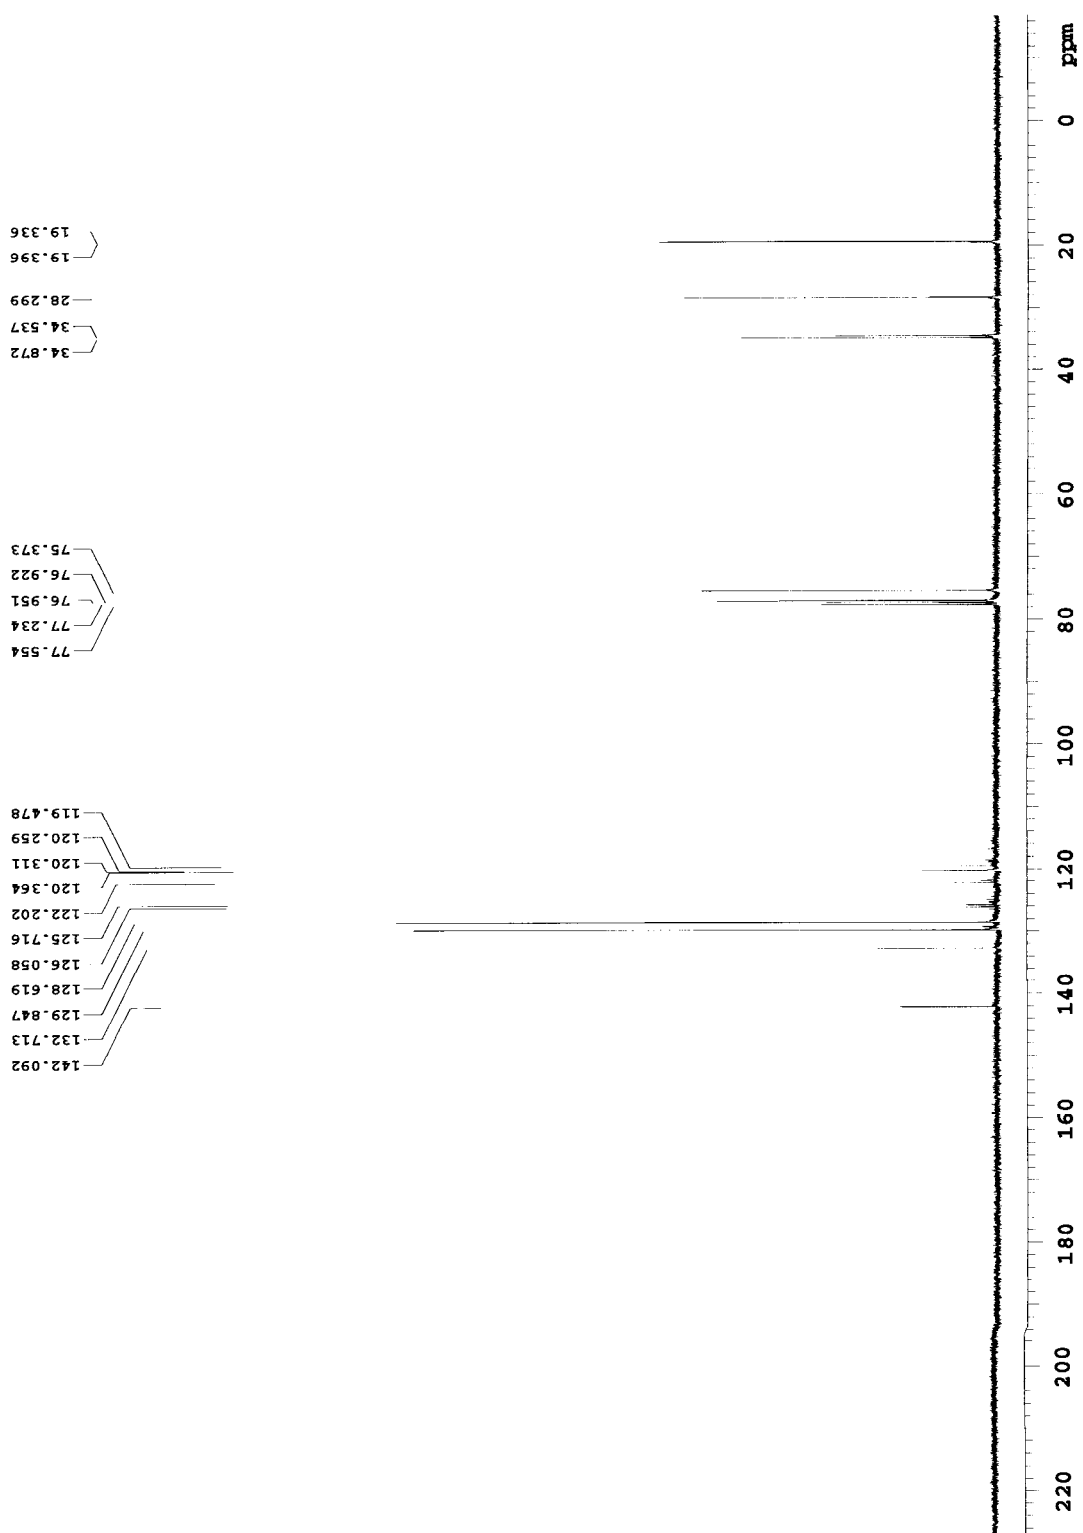

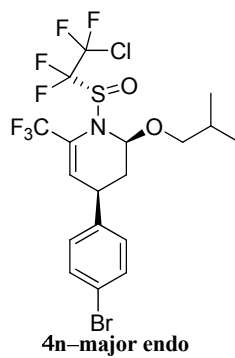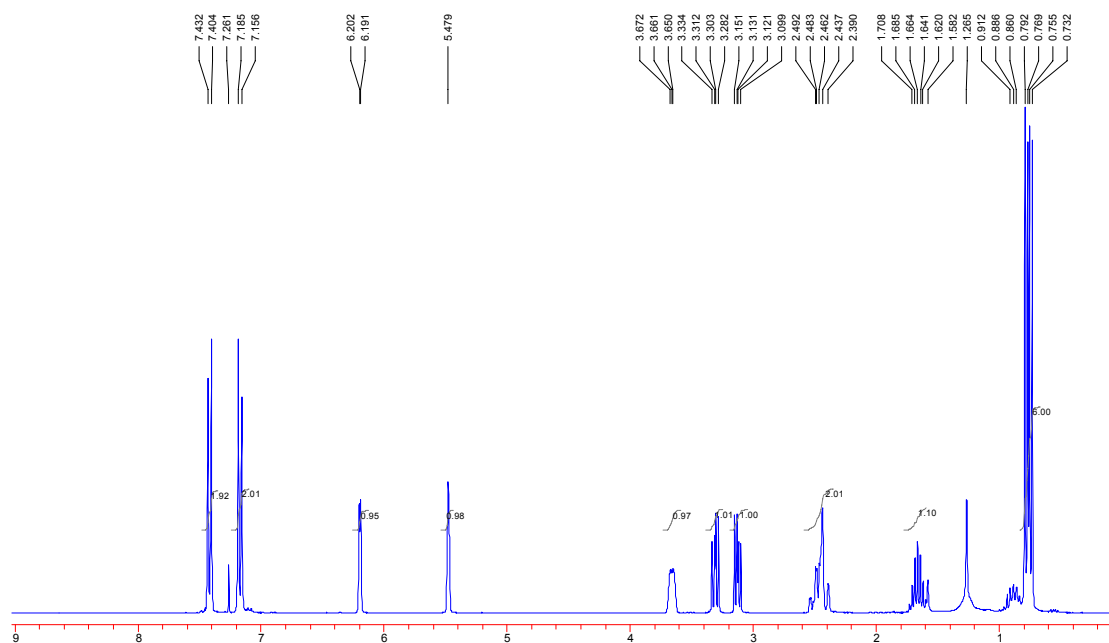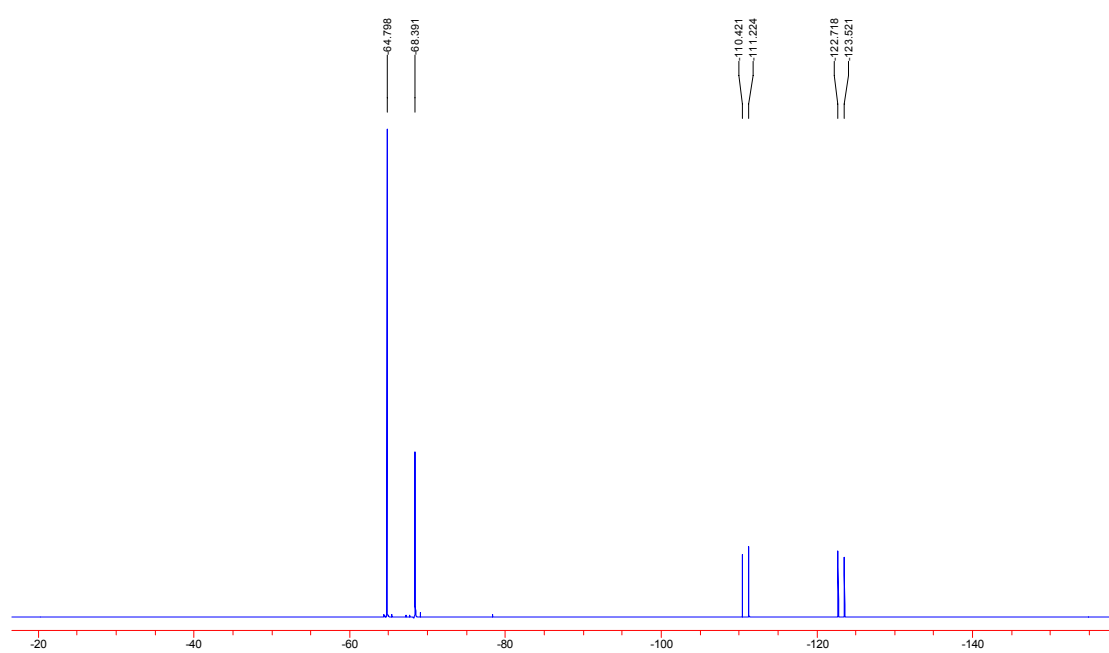

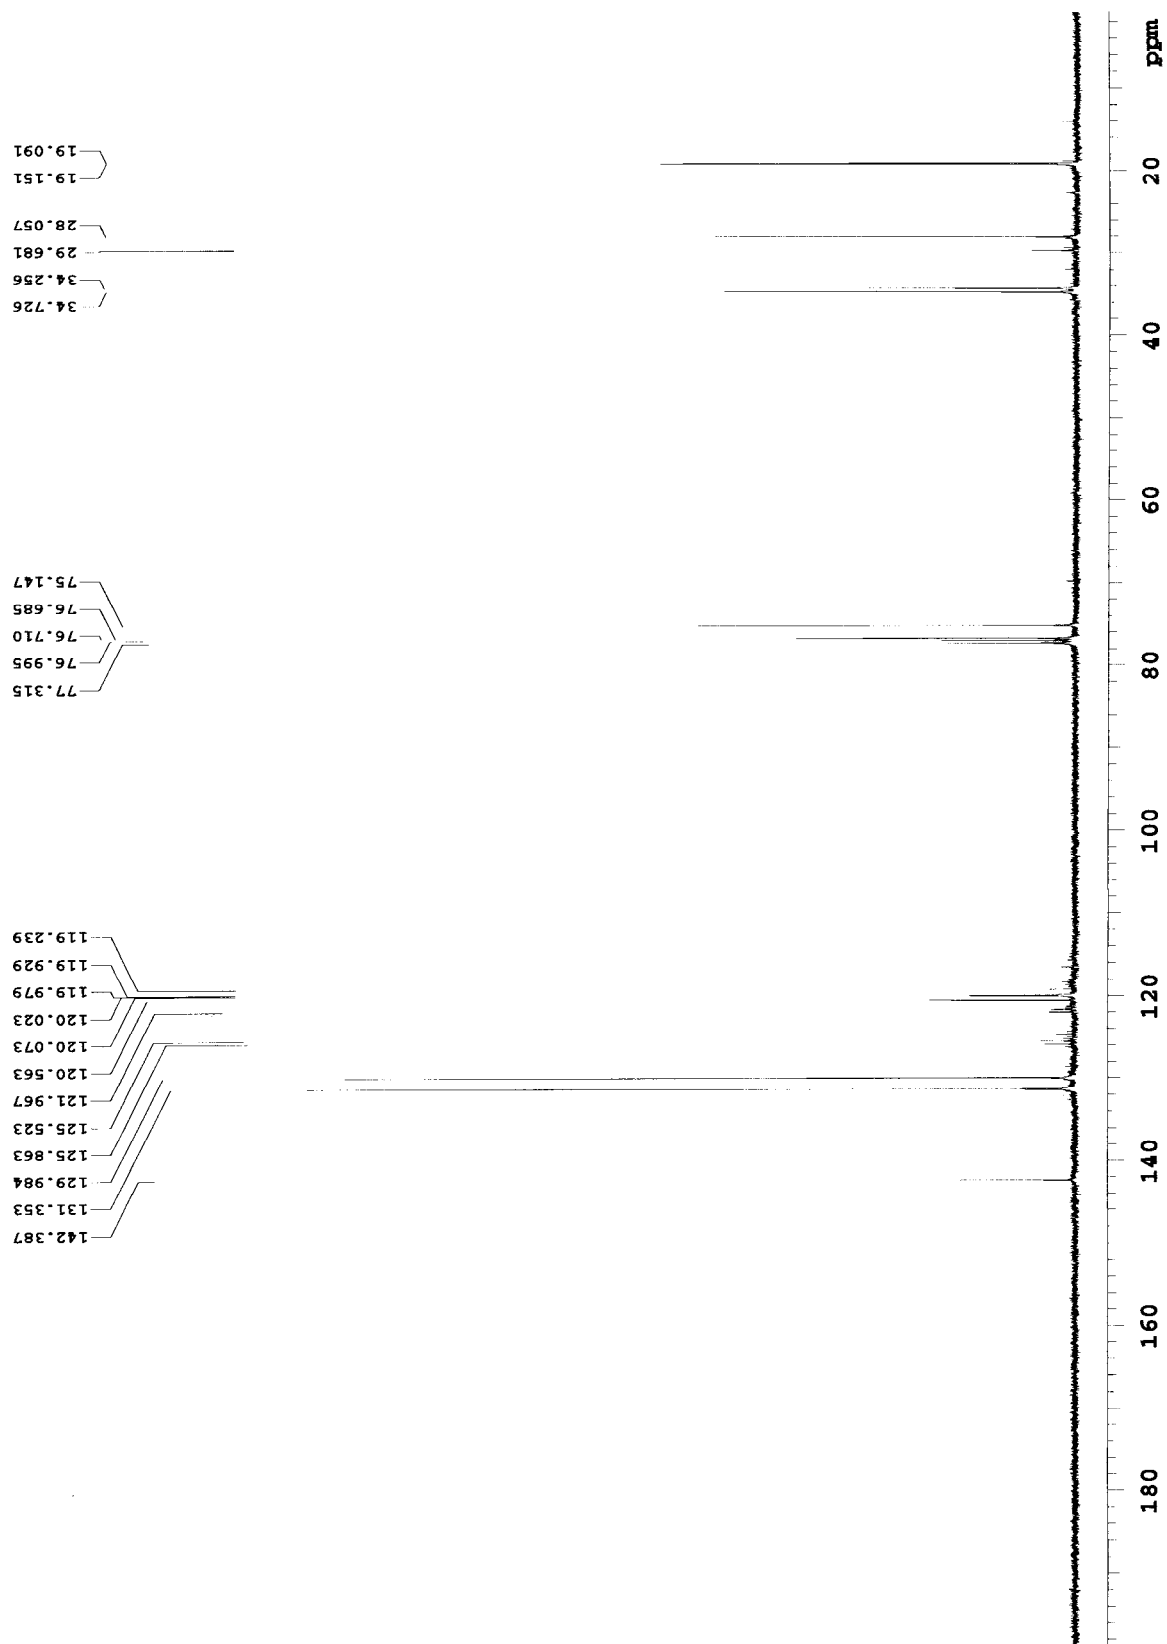

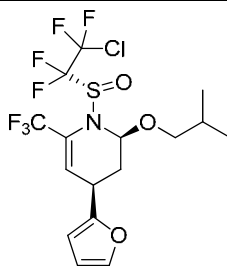

4o-major endo

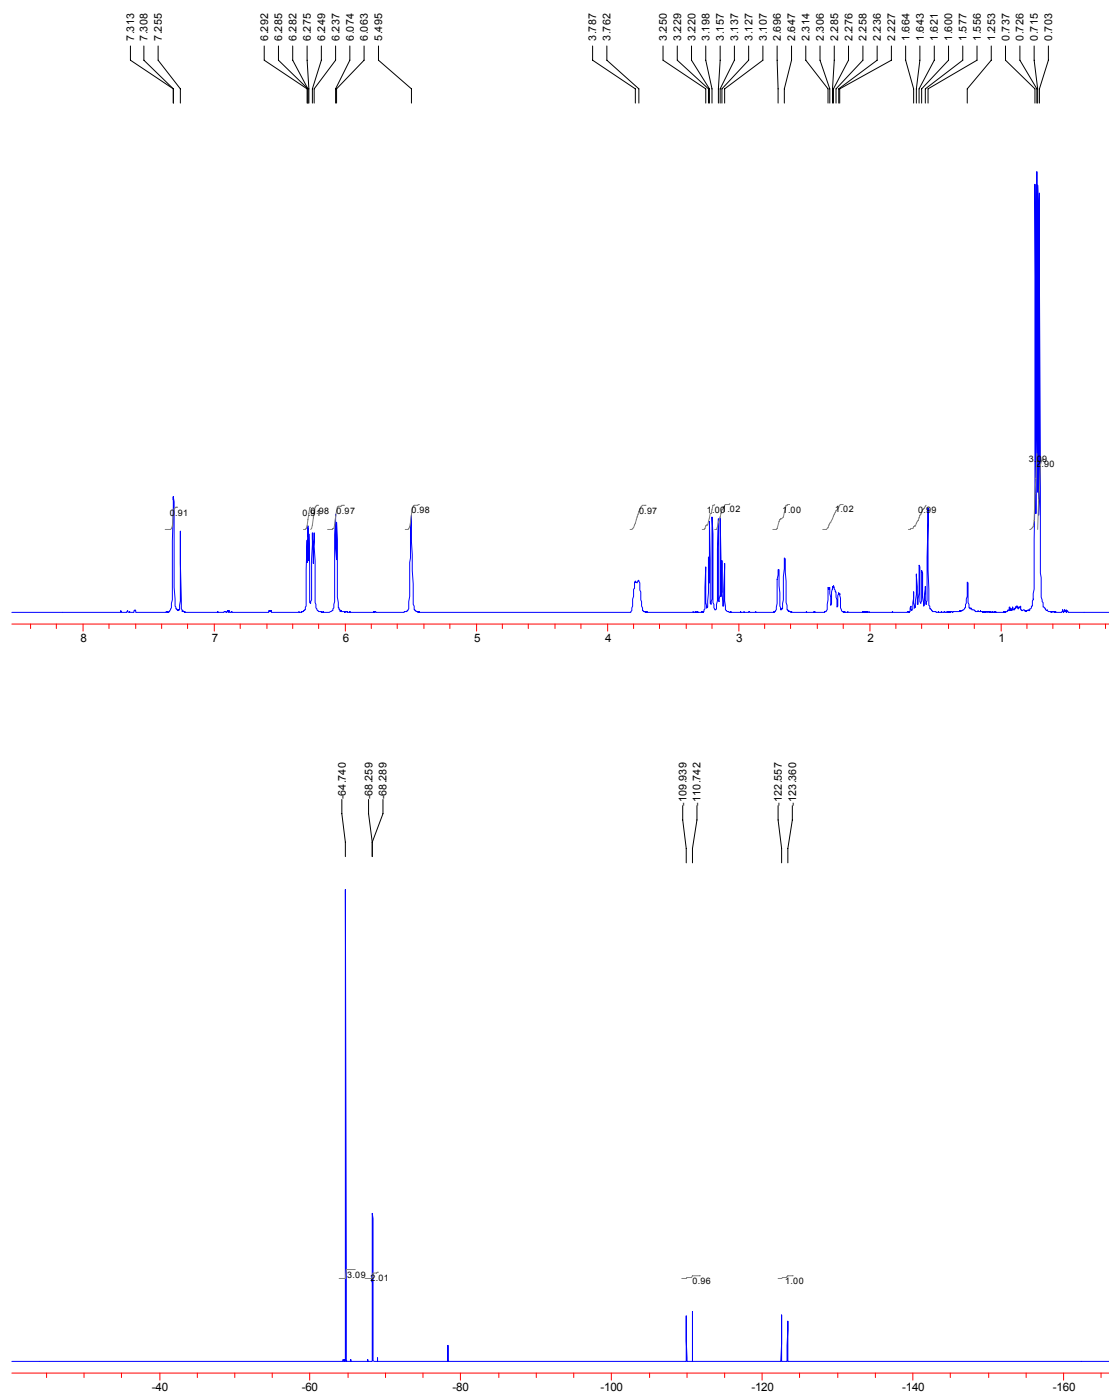

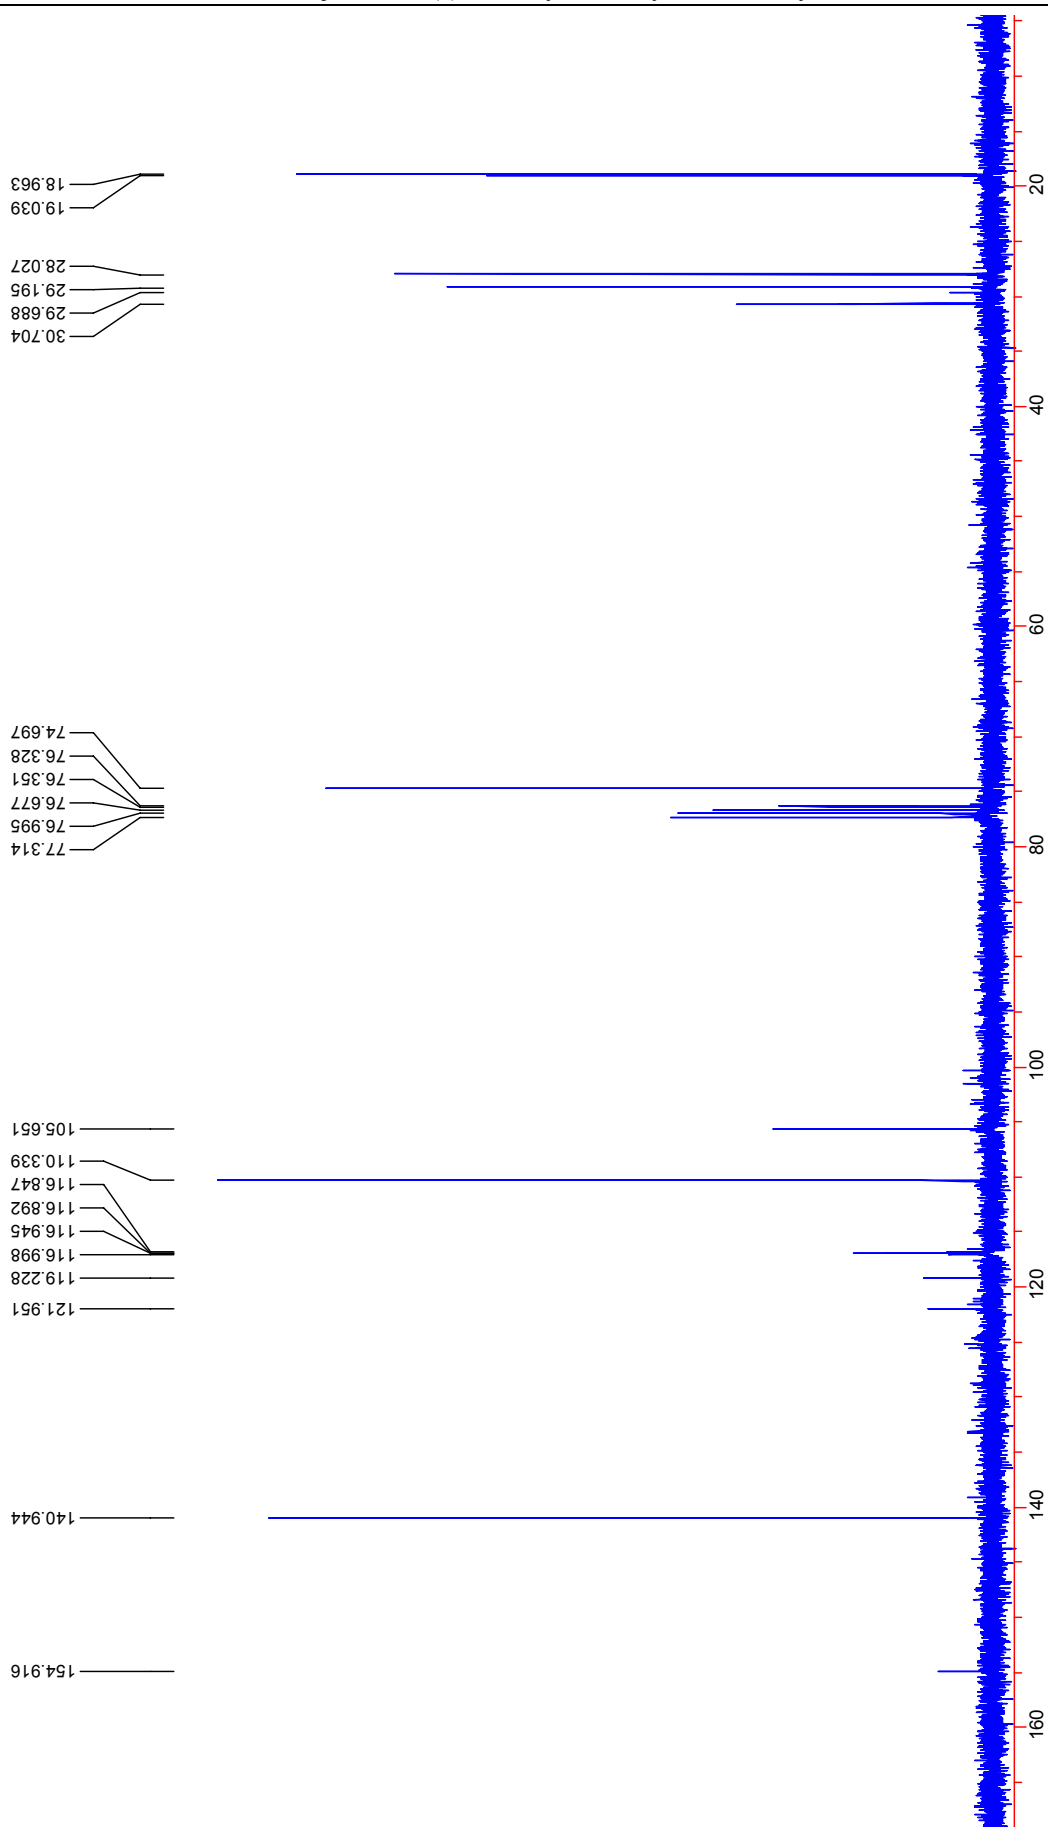

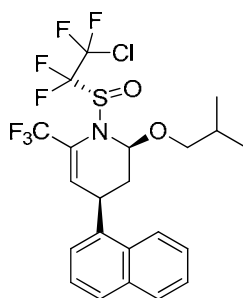

4p-major endo

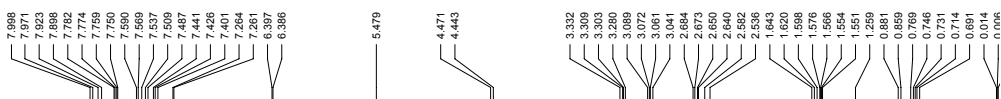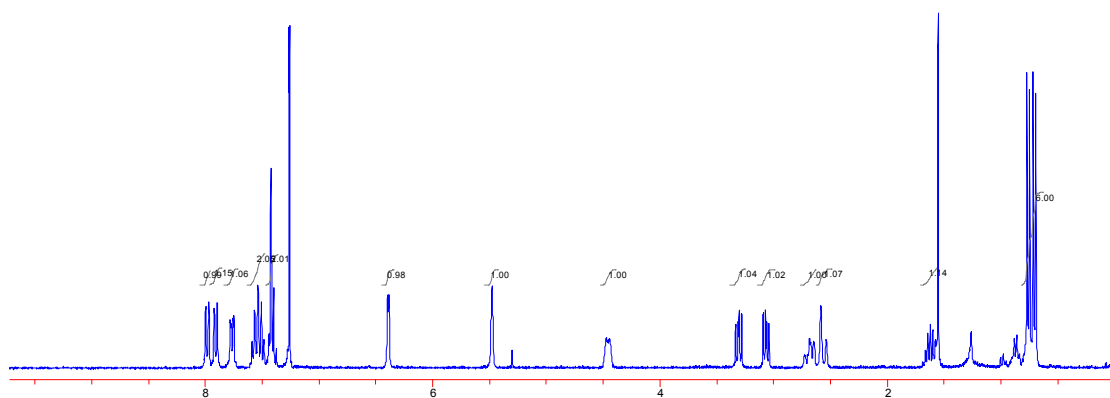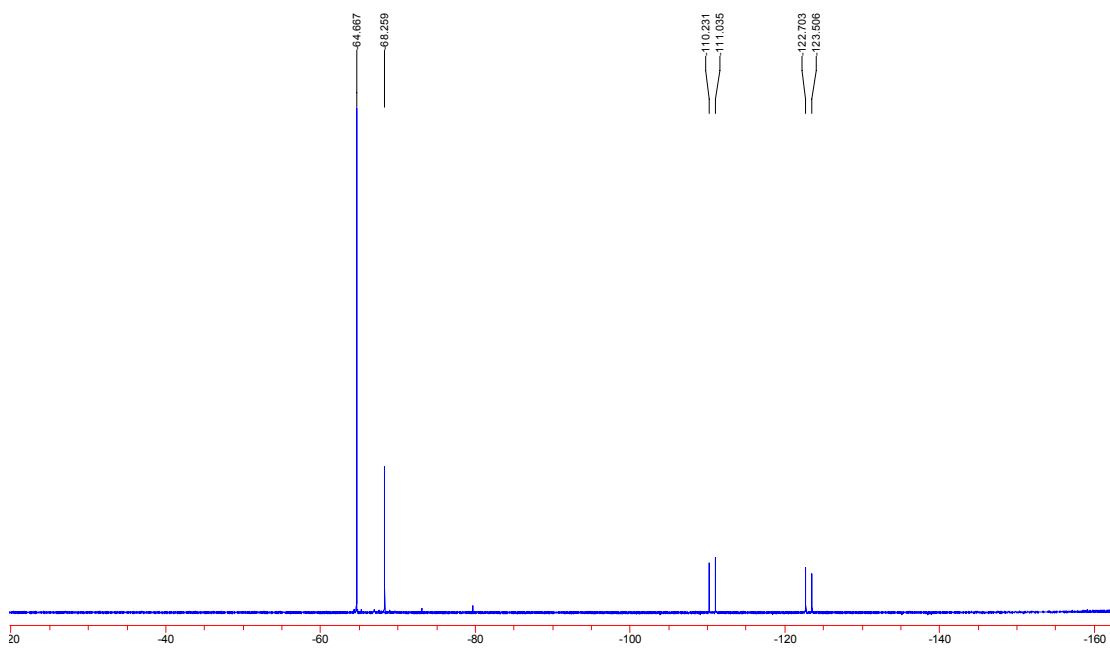

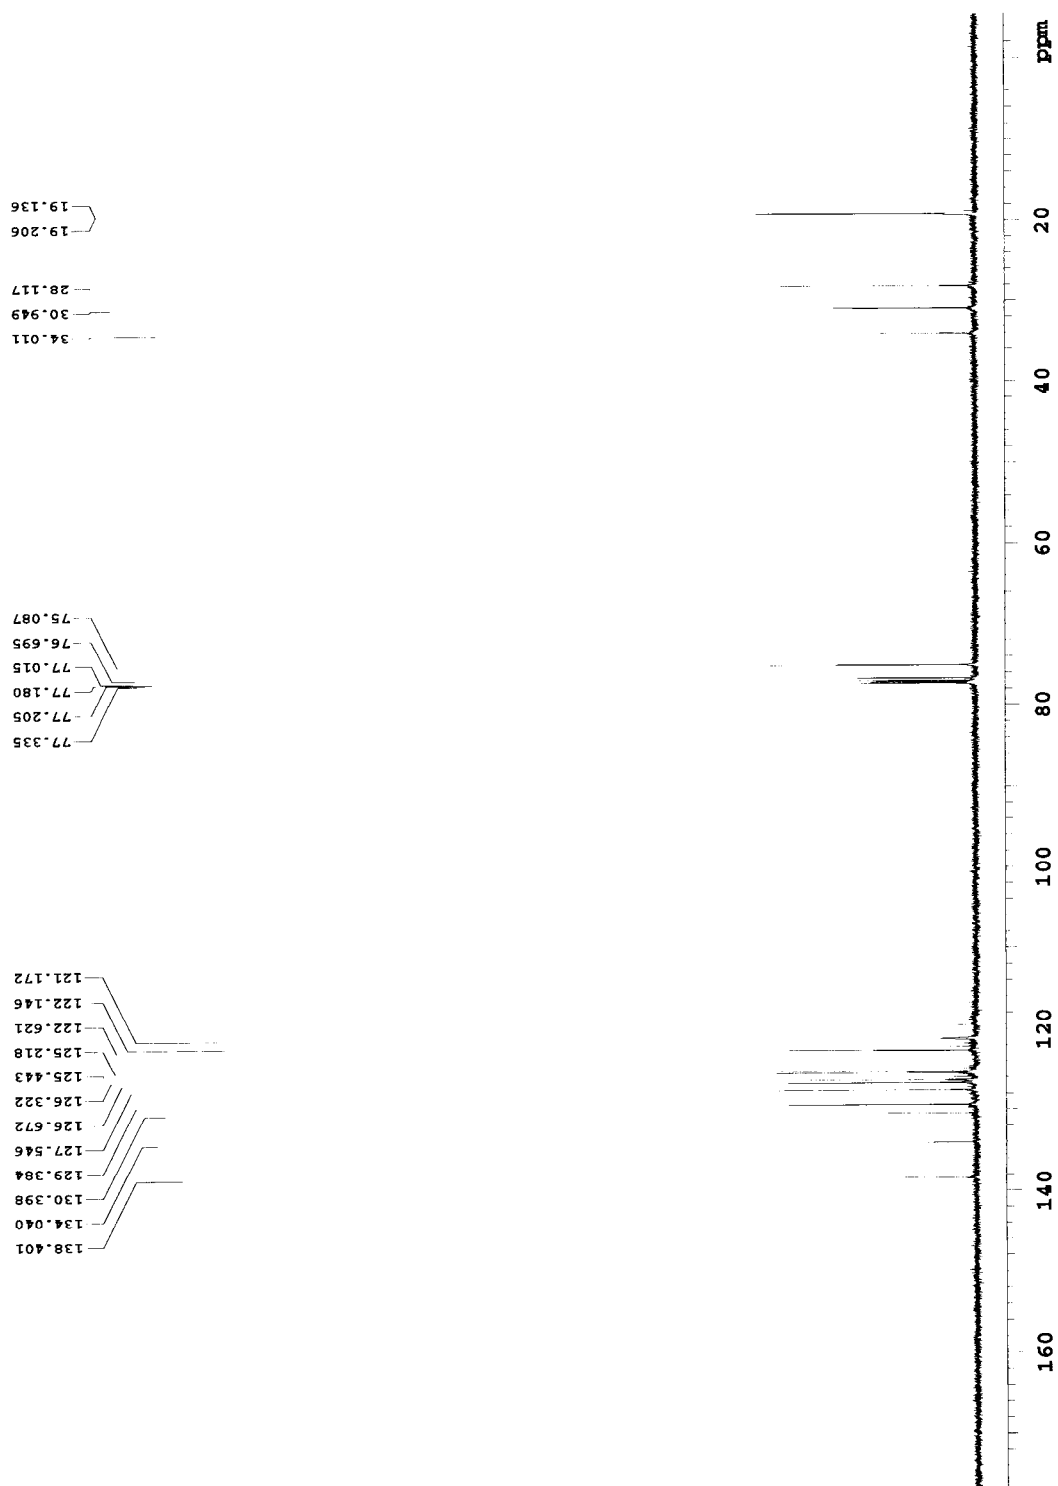



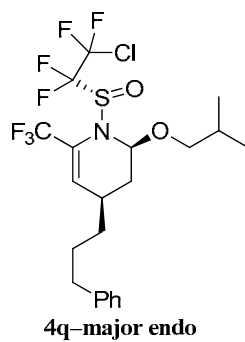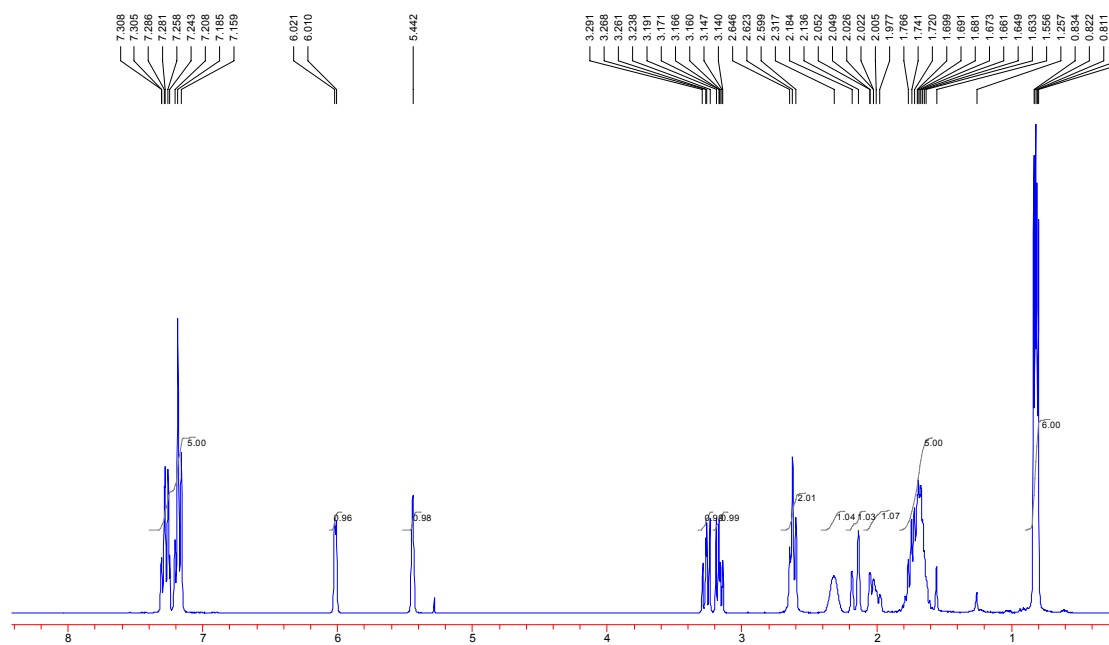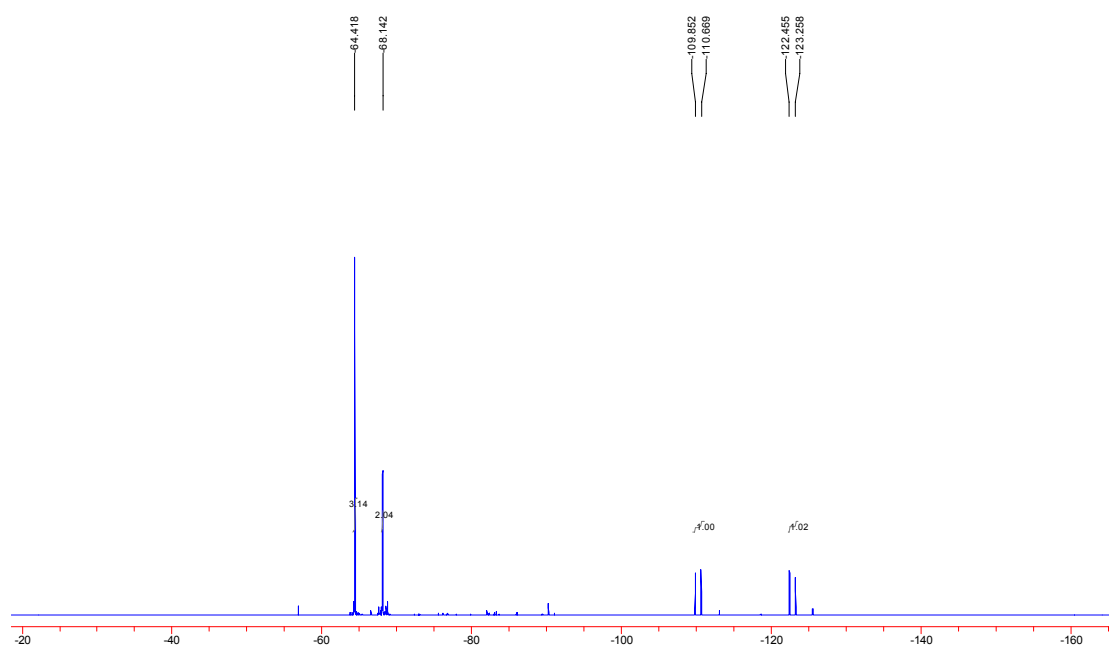

```
Current Data Parameters
NAME      2006146cc-84h2-2
EXPNO    1
PROCNO   1

F2 - Acquisition Parameters
Date_    20090506
Time     8.30
INSTRUM spect
PROBHD   5 mm QNP 1H/13
PULPROG zgpg30
TD       65536
SOLVENT  CDCl3
NS       1264
DS       4
SWH      43859.648 Hz
FIDRES   0.669245 Hz
AQ       0.7471718 sec
RG       18390.4
DW       11.400 usec
DE       6.50 usec
TE       300.0 K
D1       2.0000000 sec
d11      0.0300000 sec
DELTA    1.8999998 sec
TD0      1

===== CHANNEL f1 =====
NUC1     13C
P1       8.20 usec
PL1      -4.00 dB
SFO1     125.7722606 MHz

===== CHANNEL f2 =====
CPDPRG2 waltz16
NUC2     1H
PCPD2    82.00 usec
PL12     15.00 dB
PL13     13.36 dB
PL2      -4.00 dB
SFO2     500.1320005 MHz

F2 - Processing parameters
SI       32768
SF       125.7577891 MHz
WDW      EM
SSB      0
LB       3.00 Hz
GB       0
PC       1.40
```

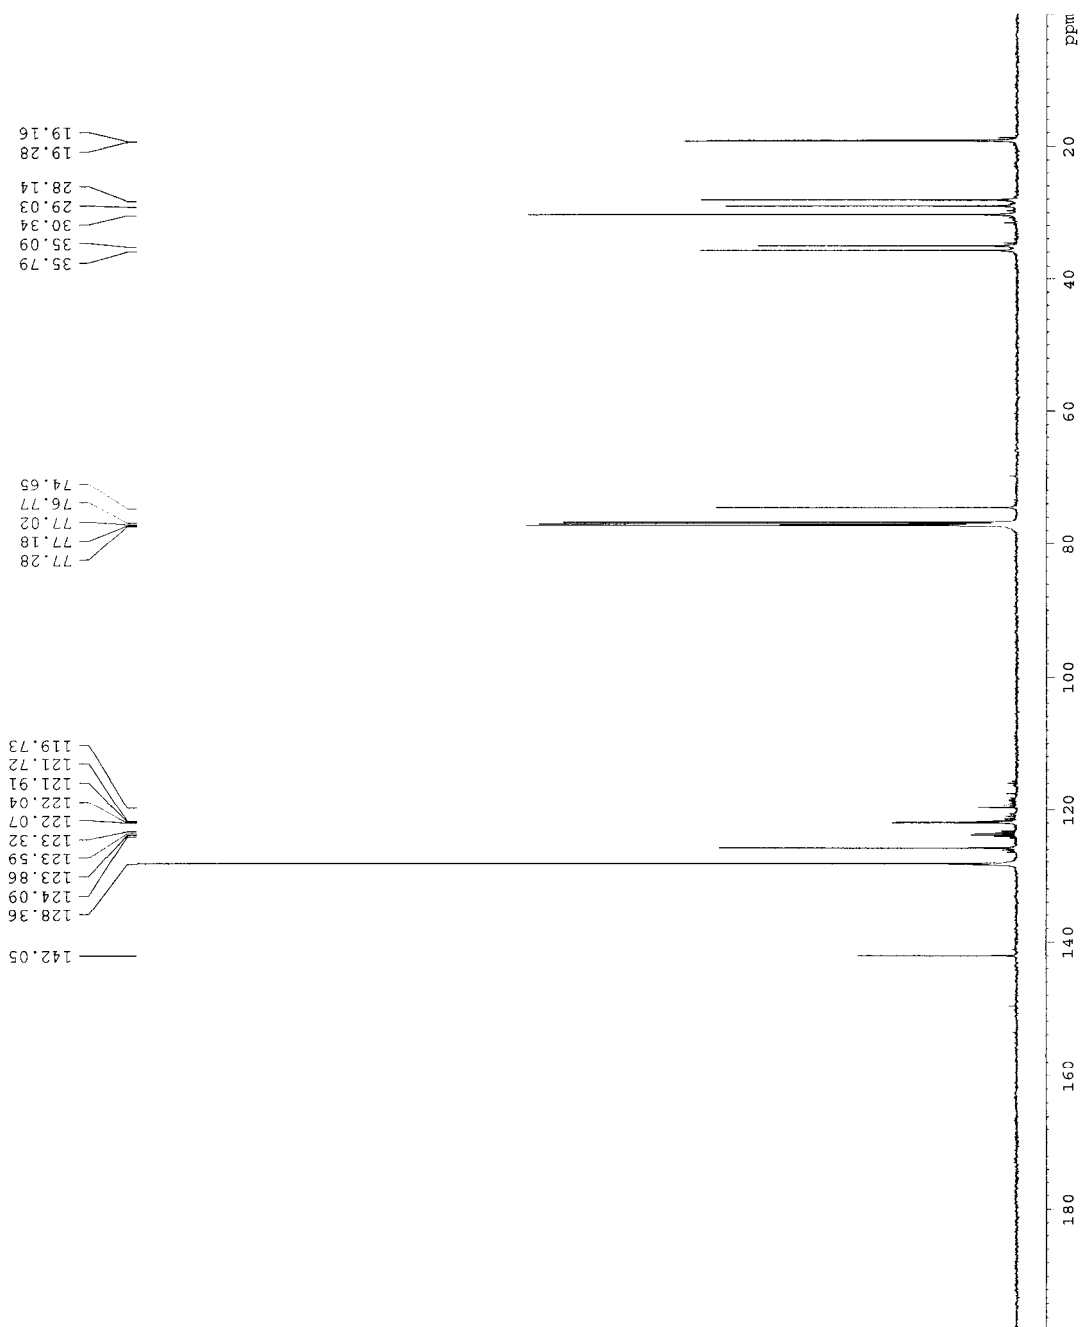

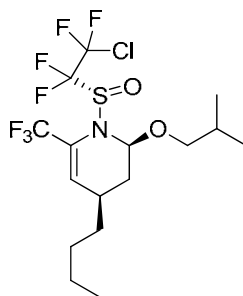

4r-major endo

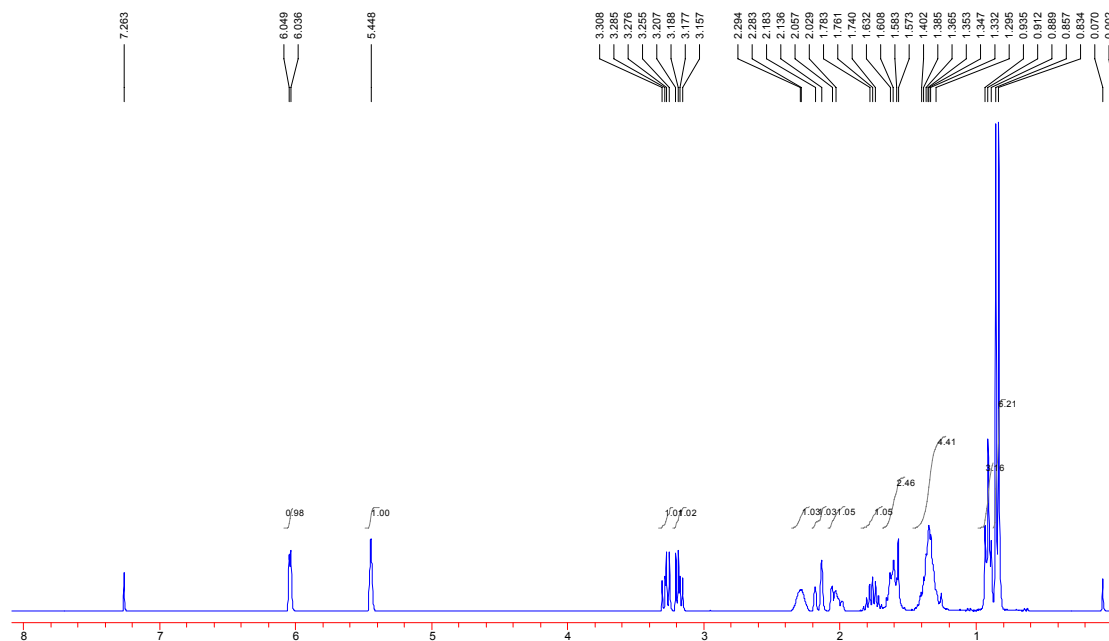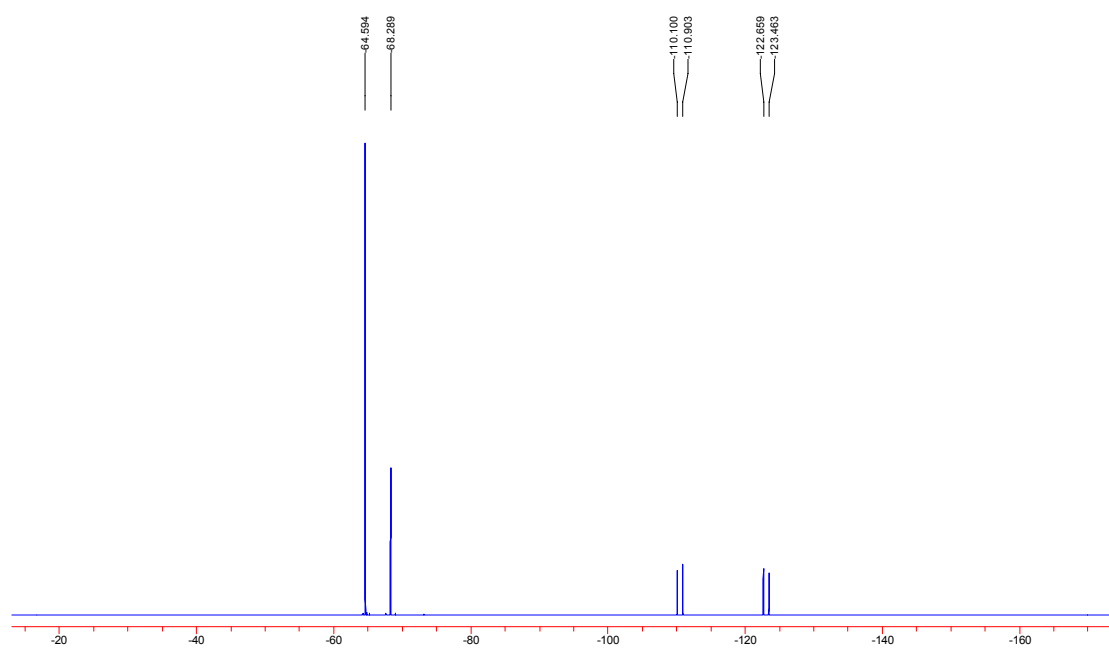

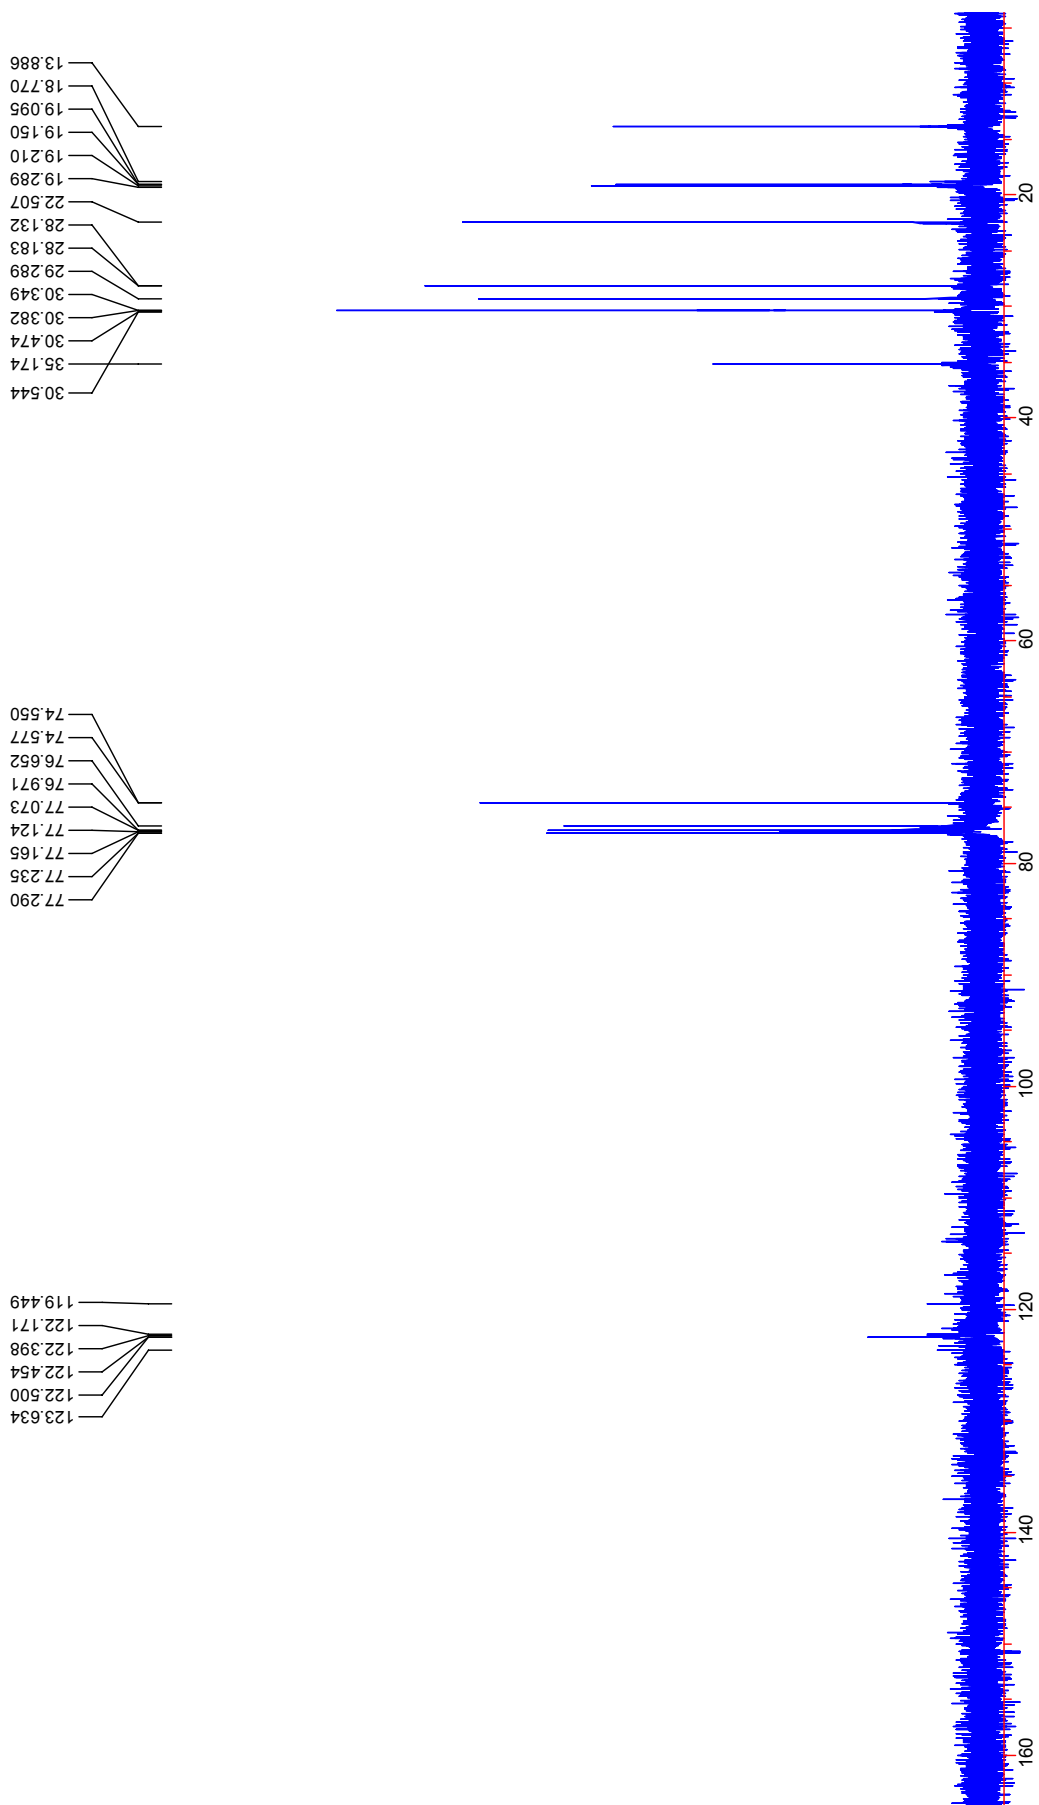

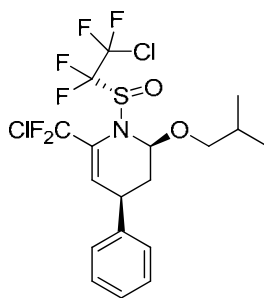

4s-major endo

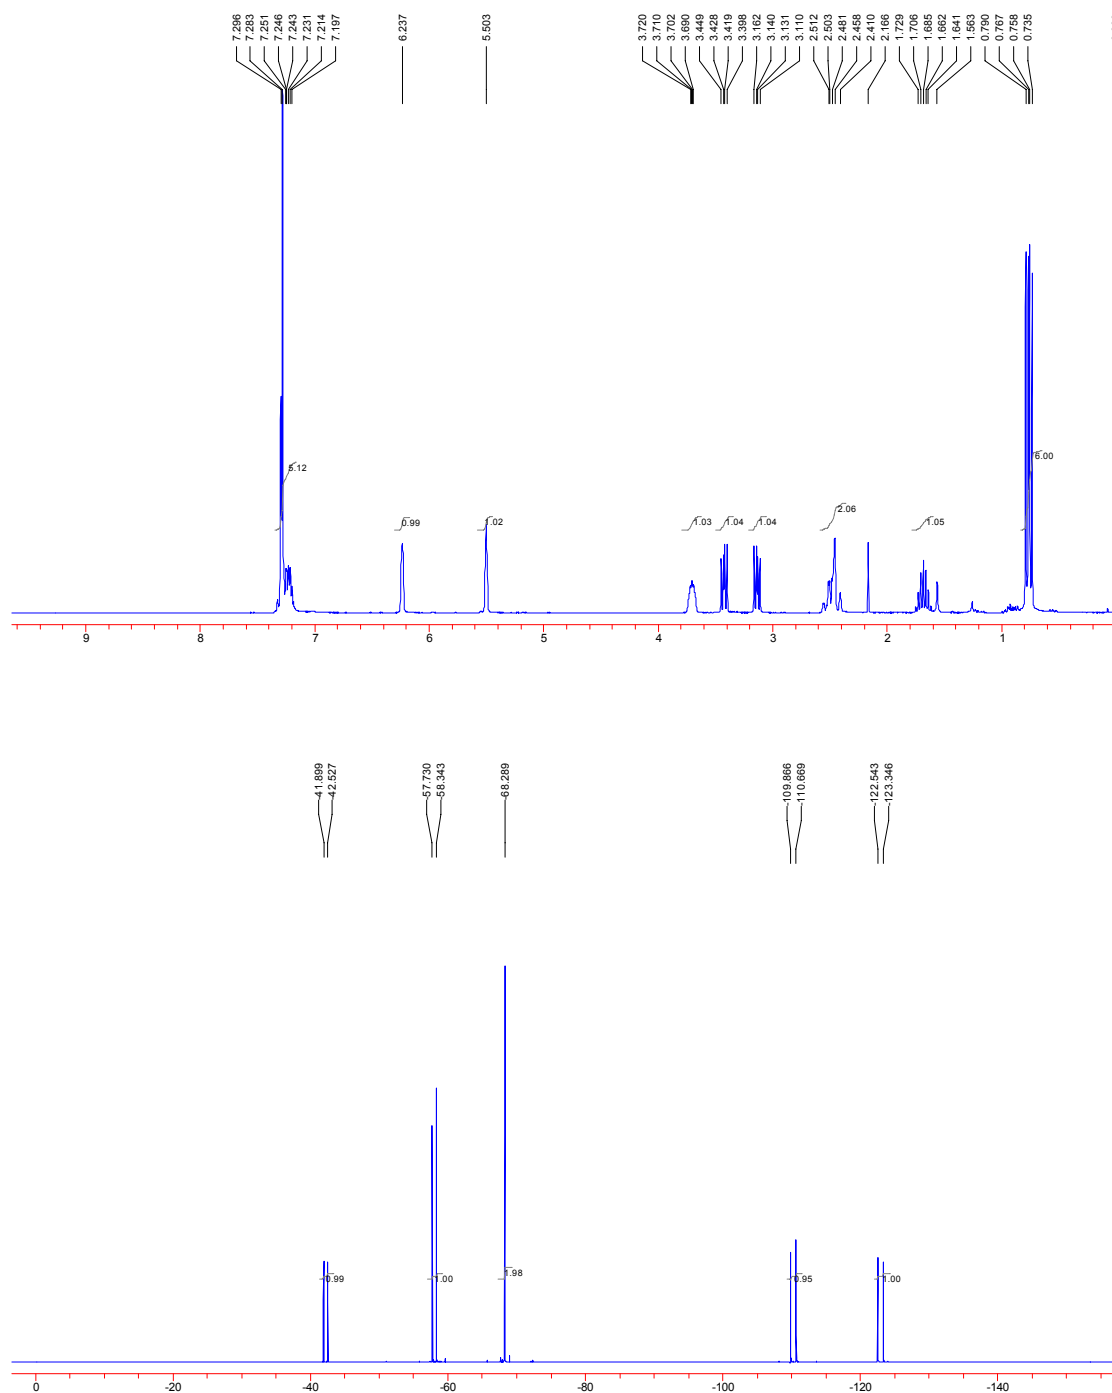

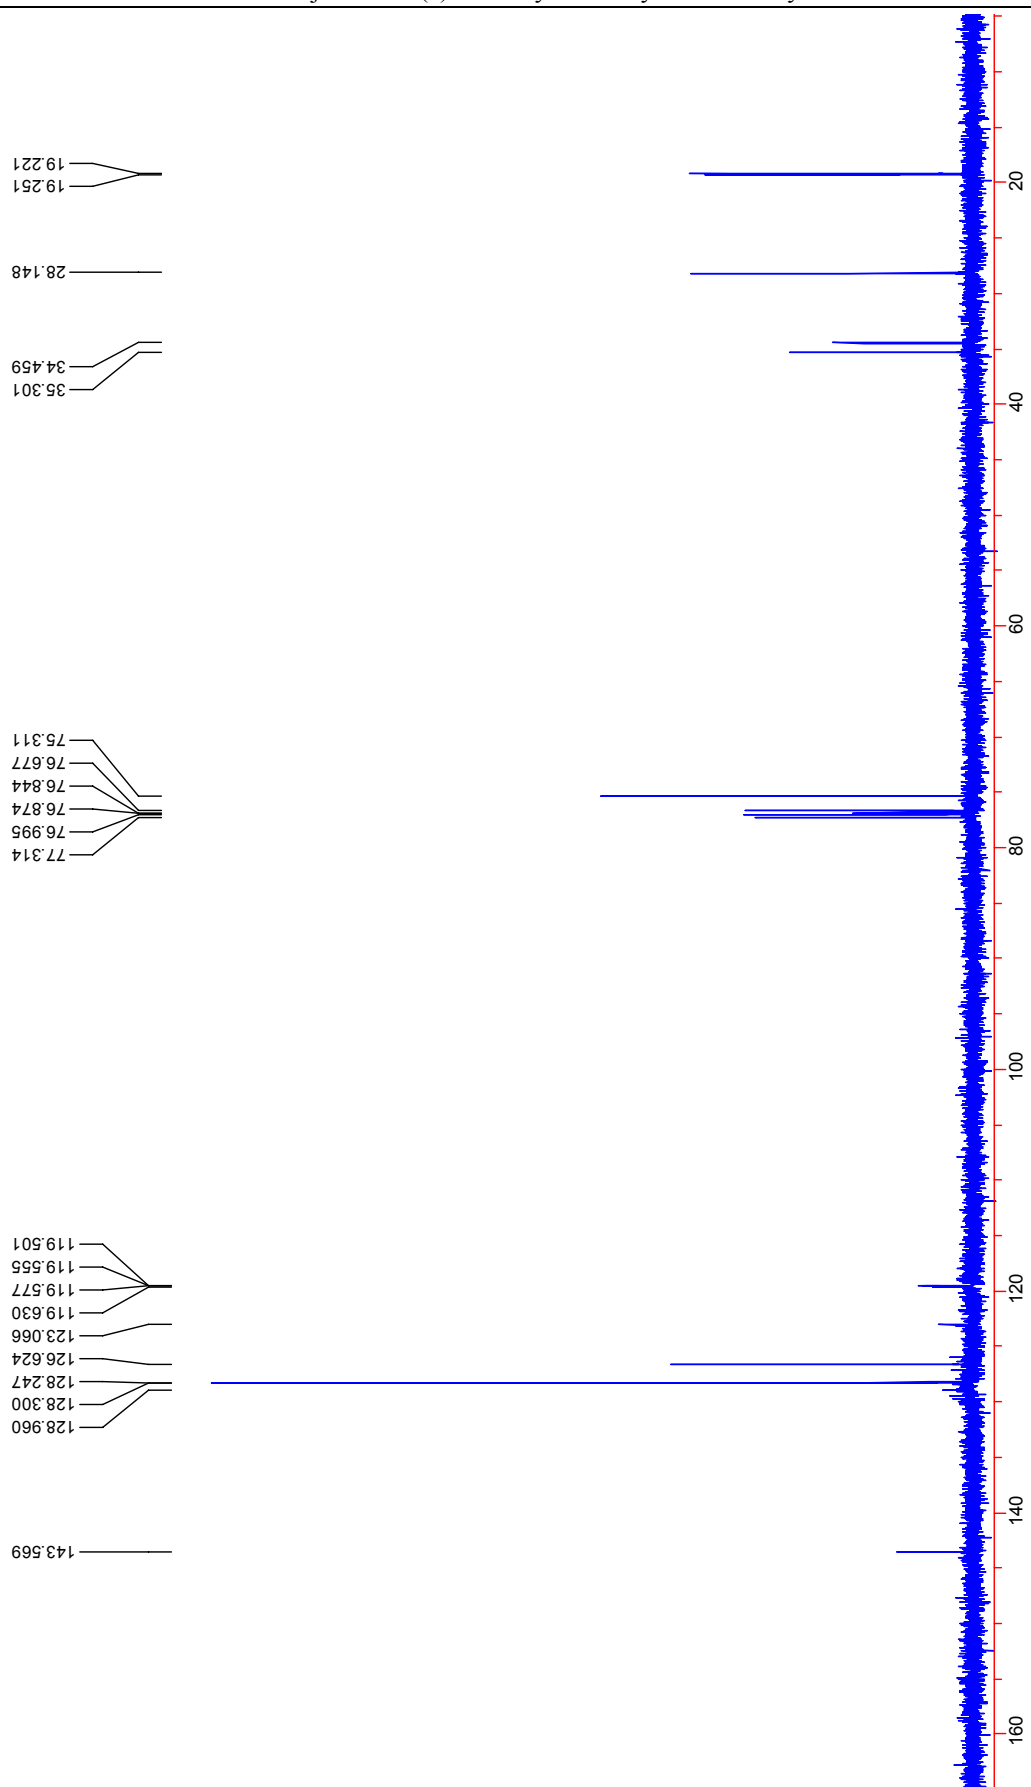

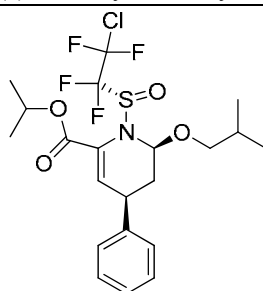

**4t-major endo**

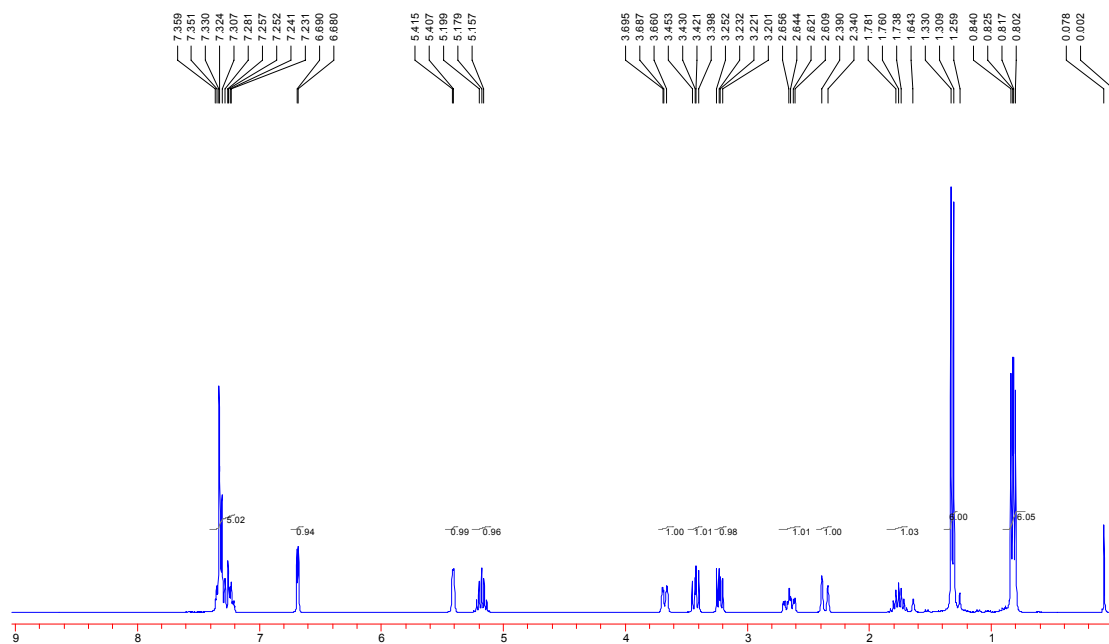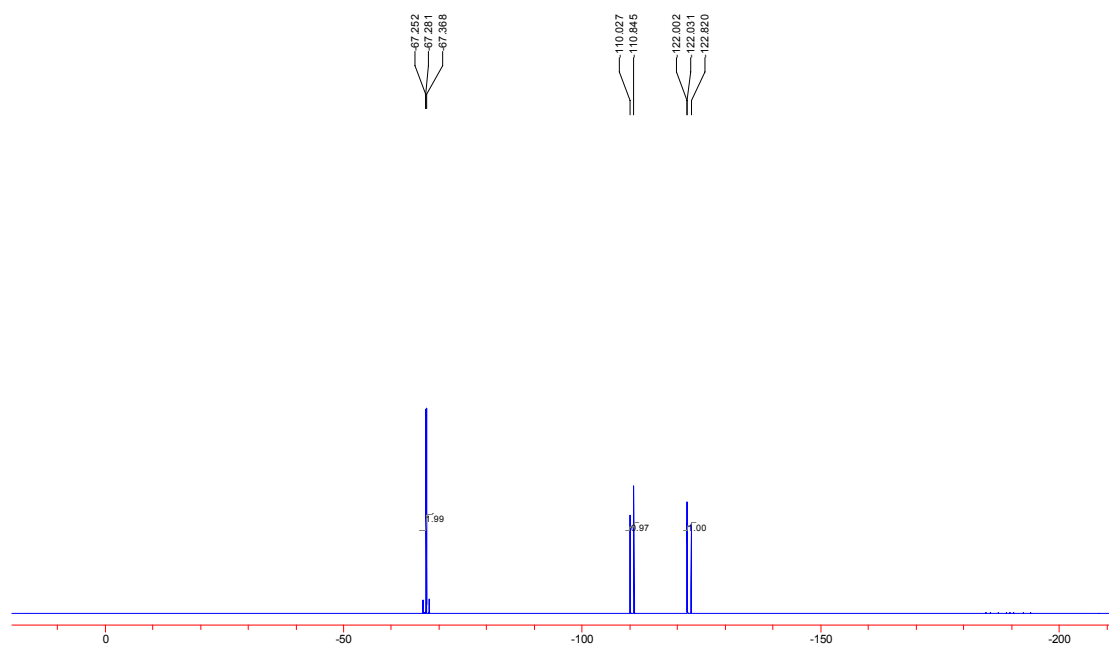

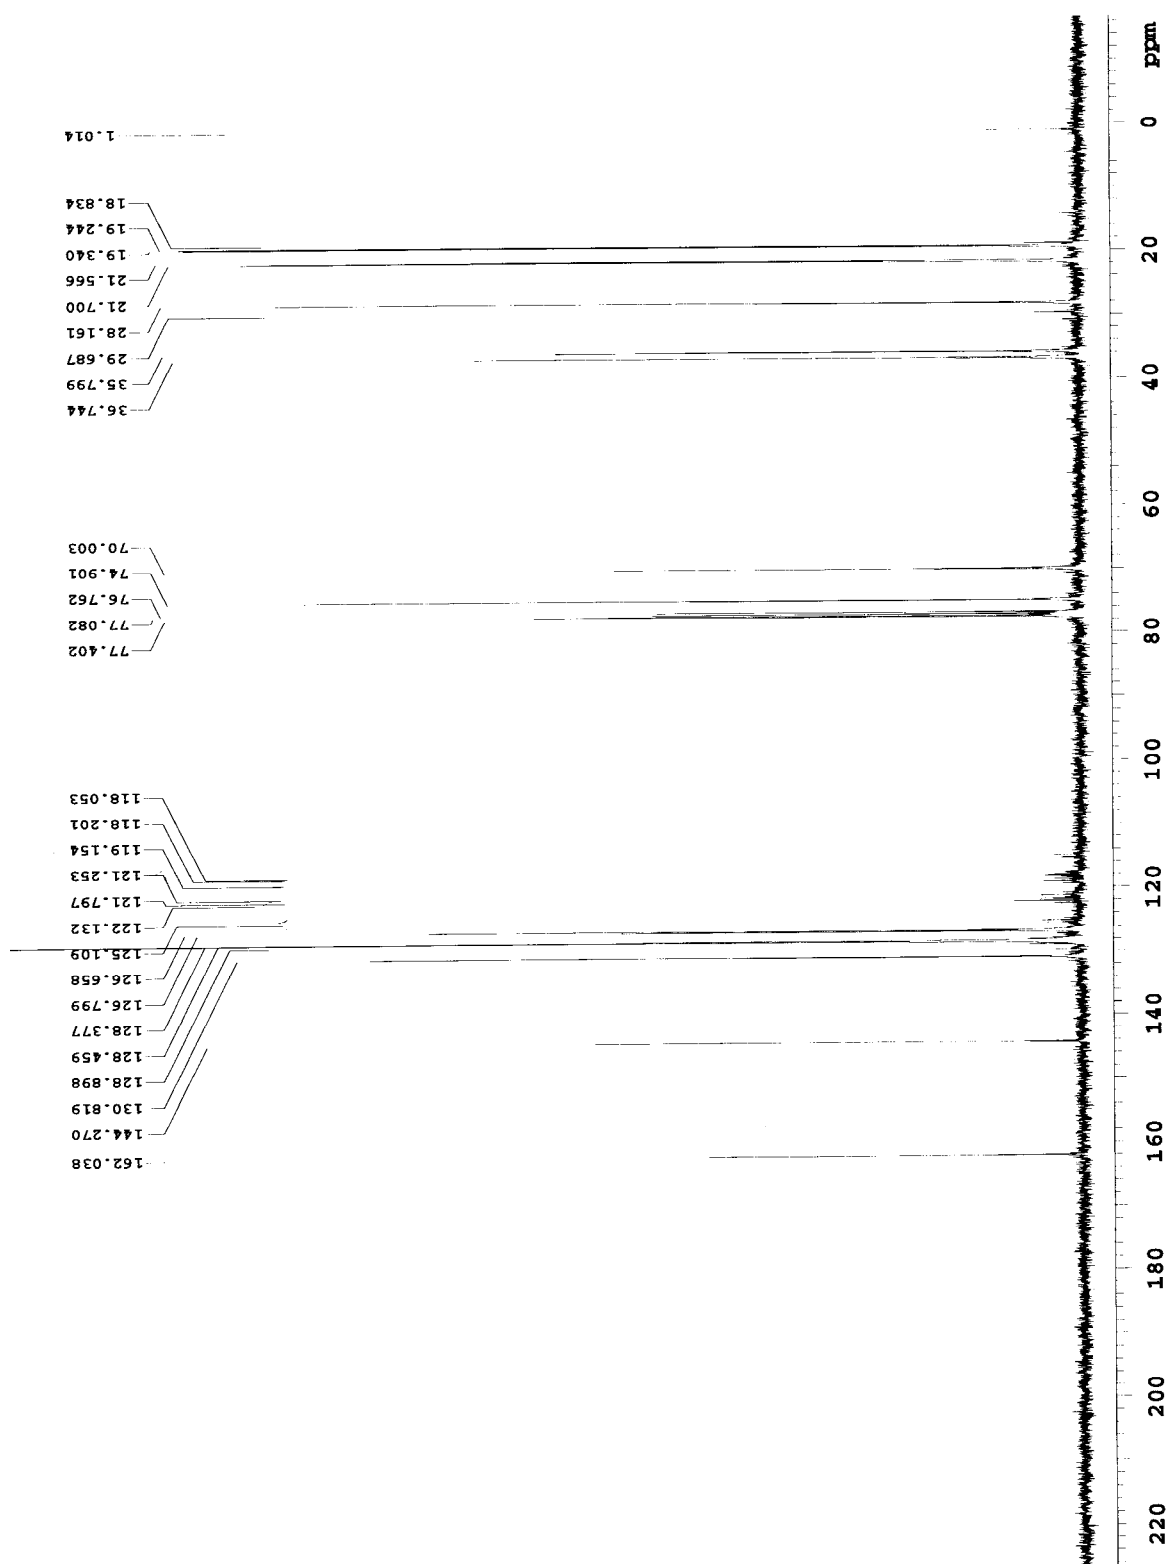



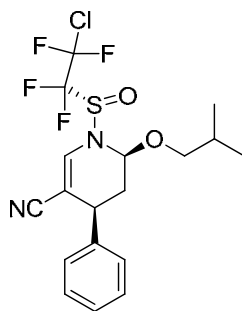

**4v-major endo**

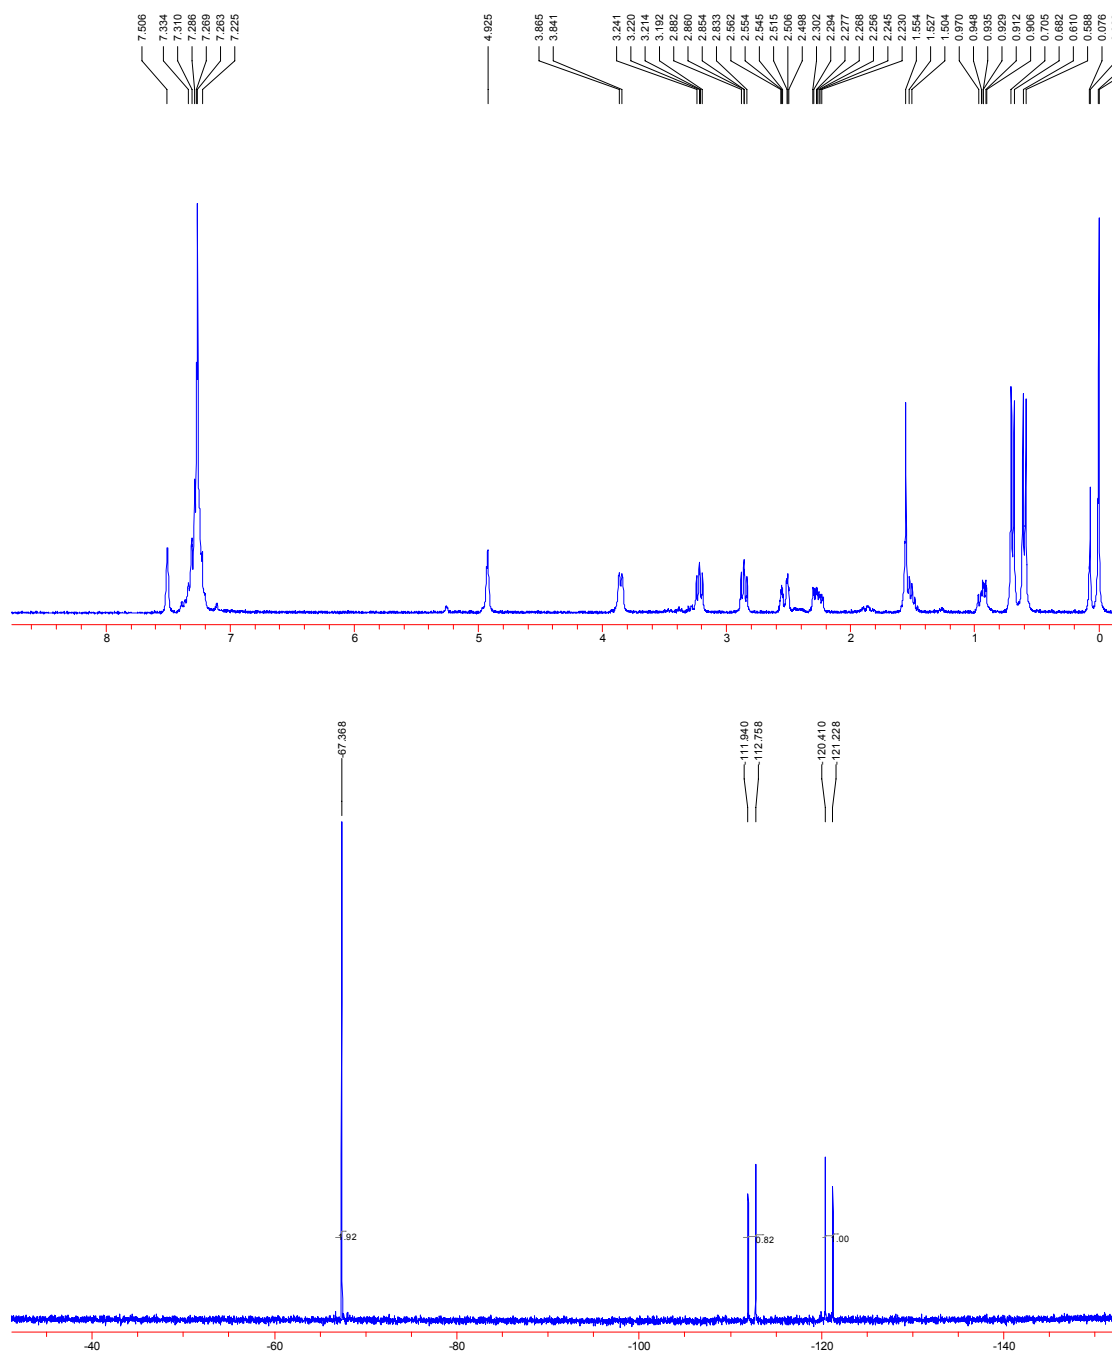

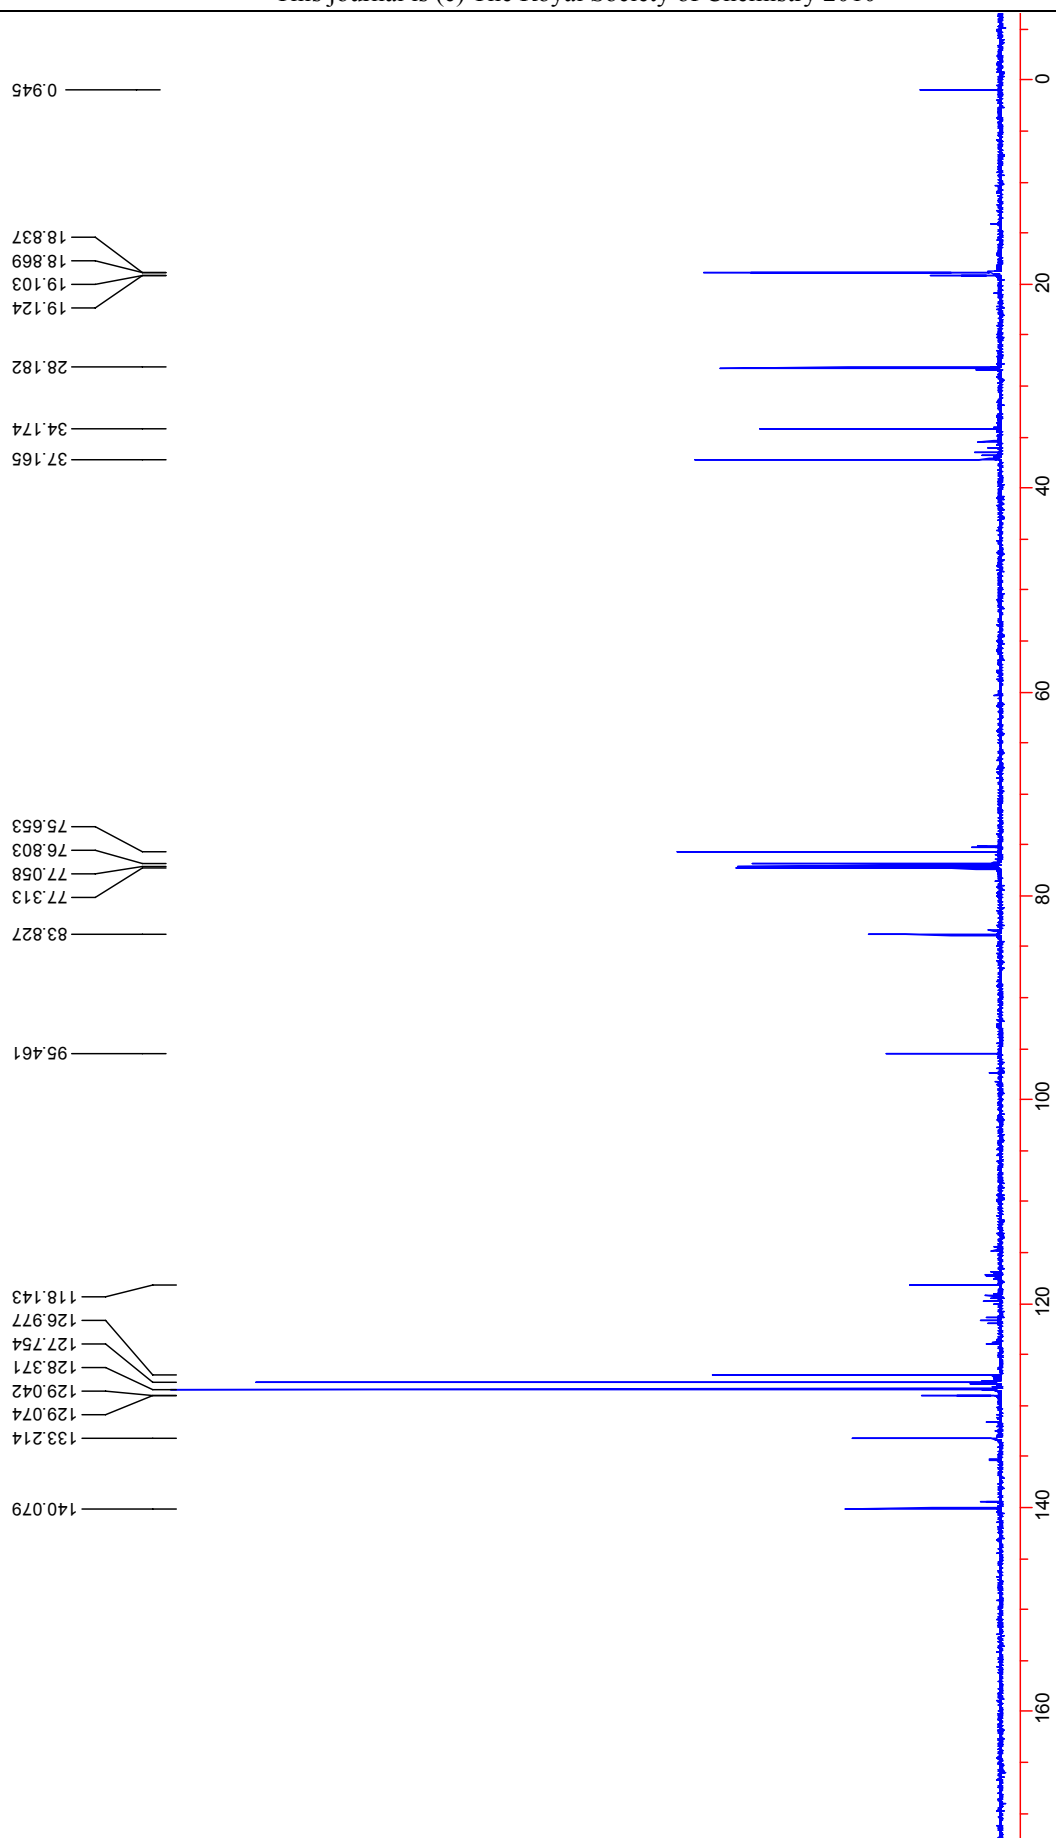

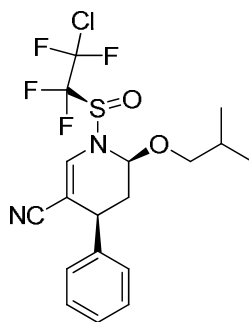

**4v-minor endo**

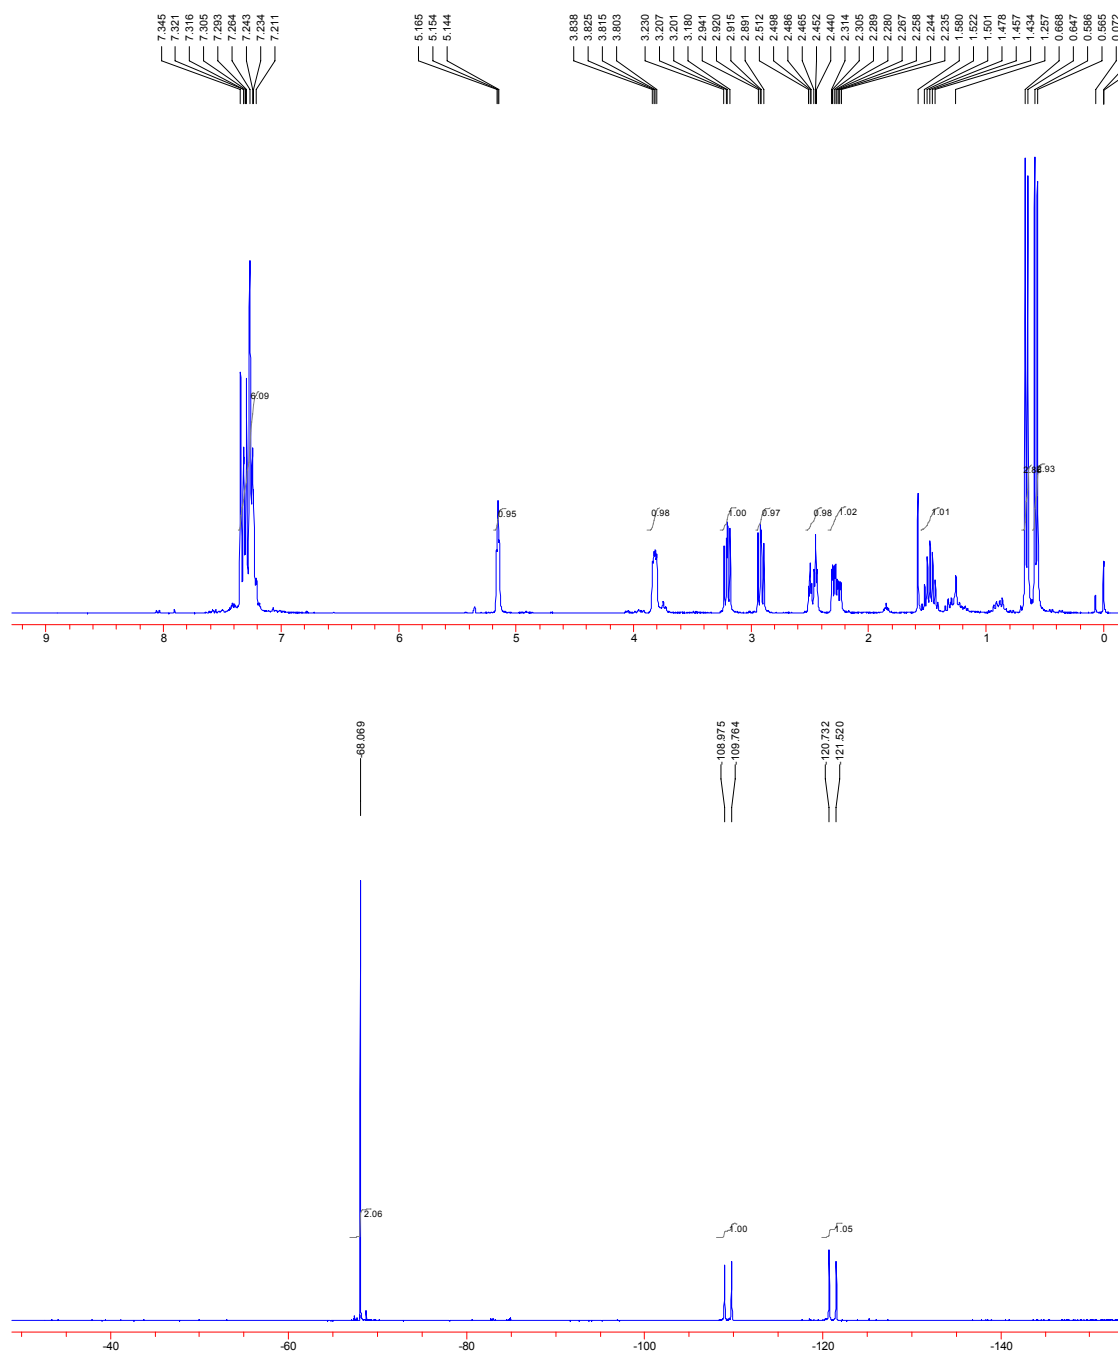

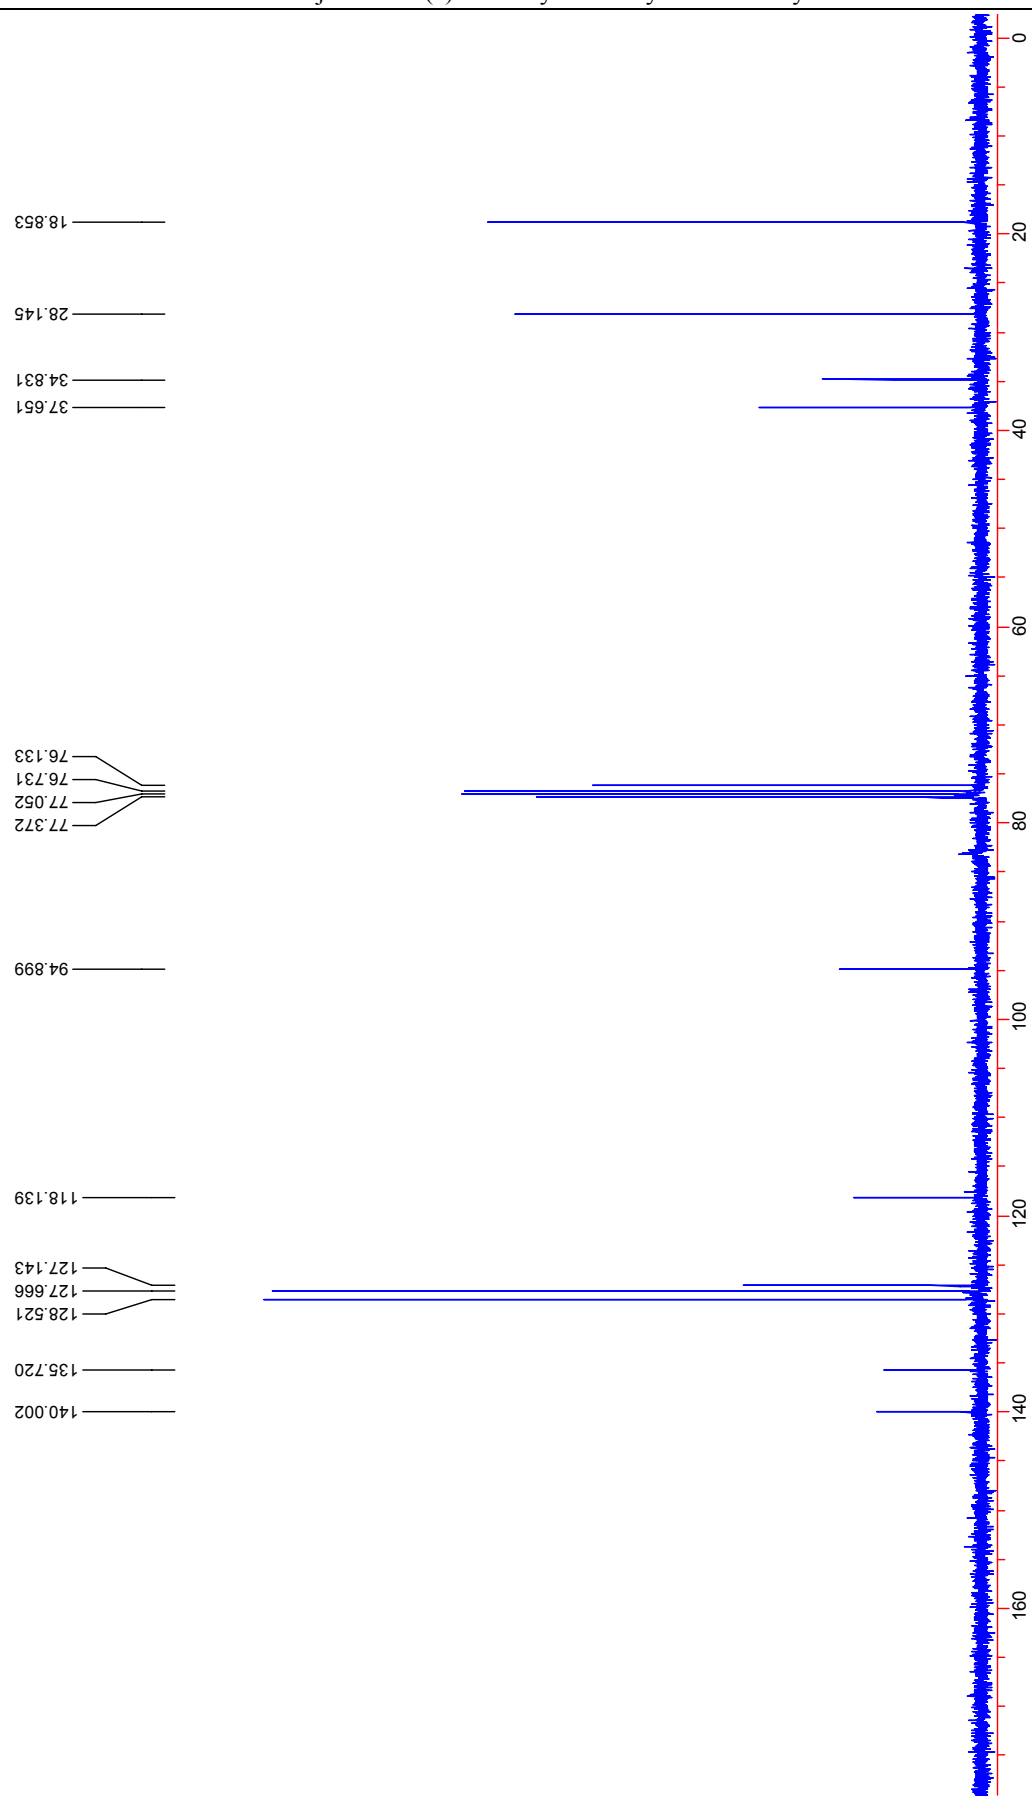

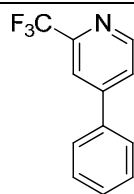

7

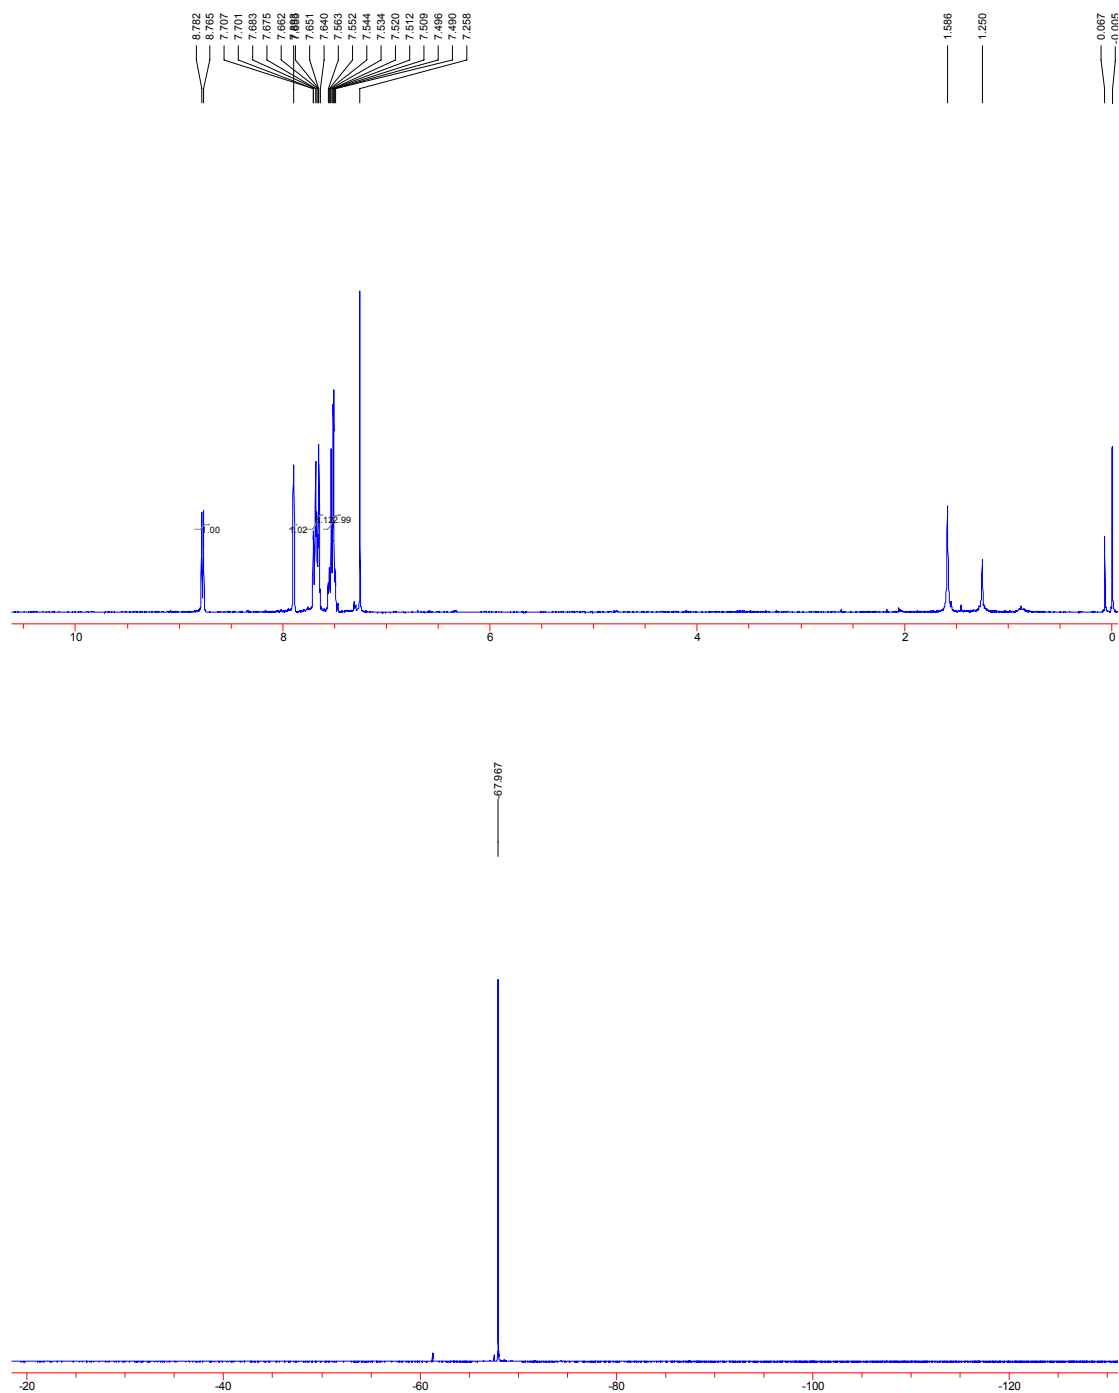

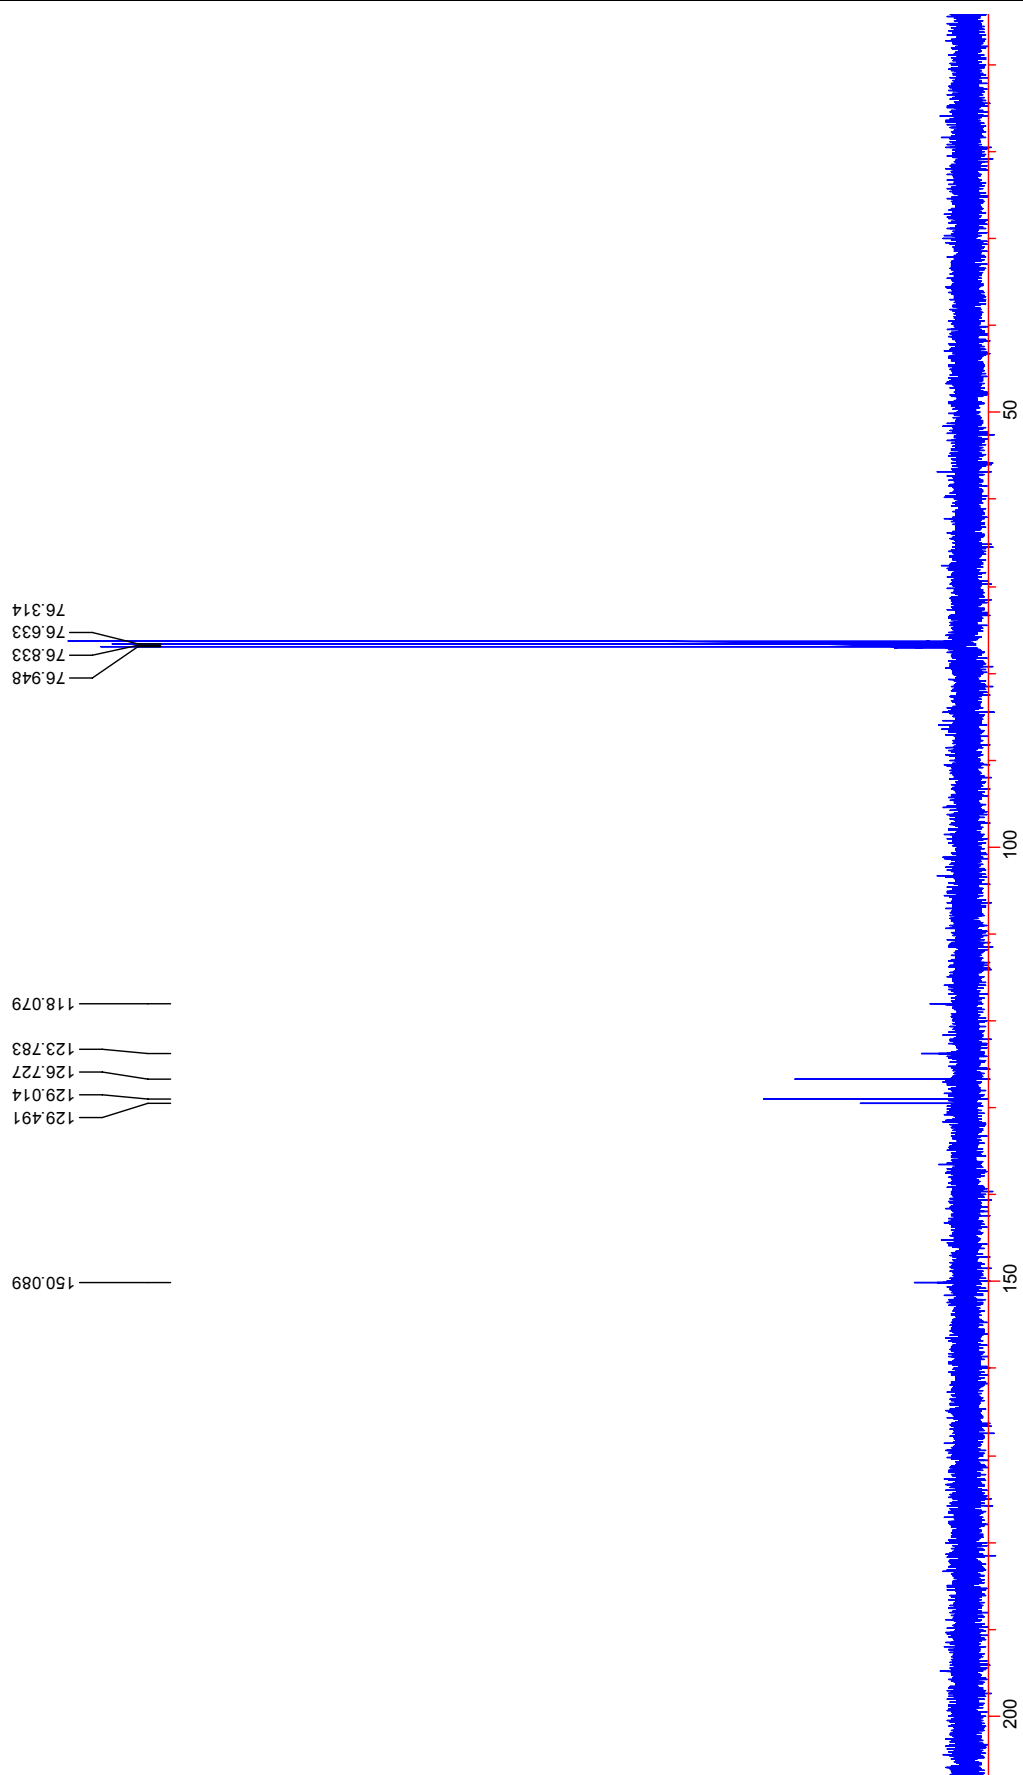

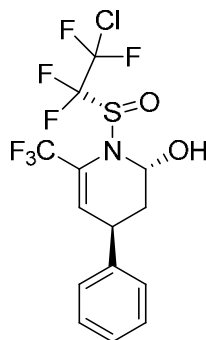

**8**

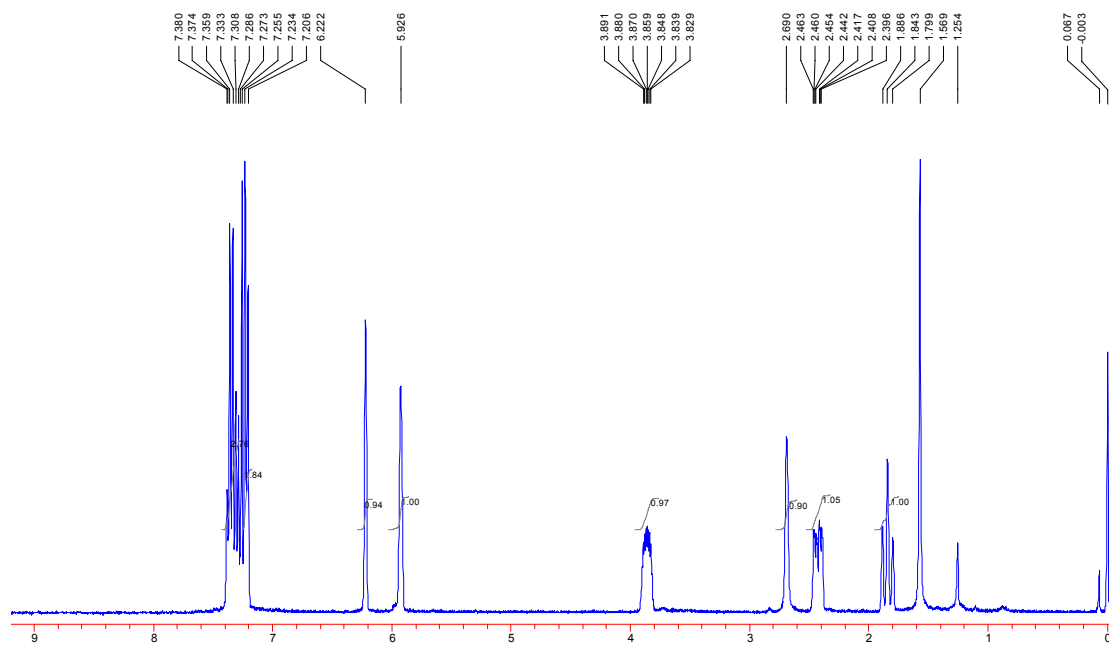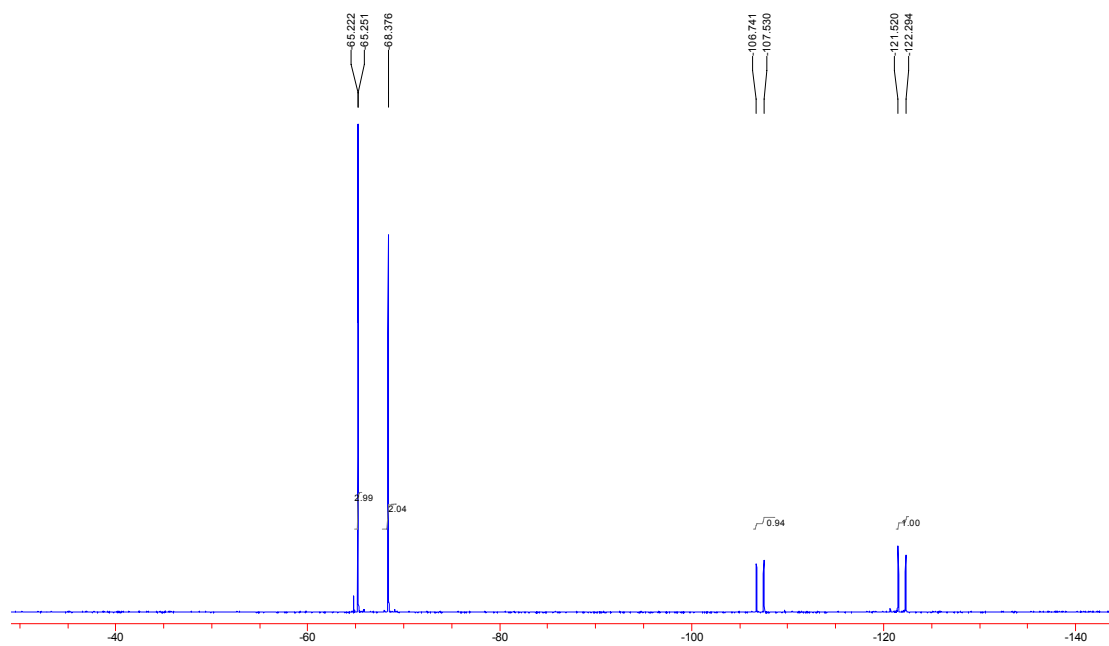

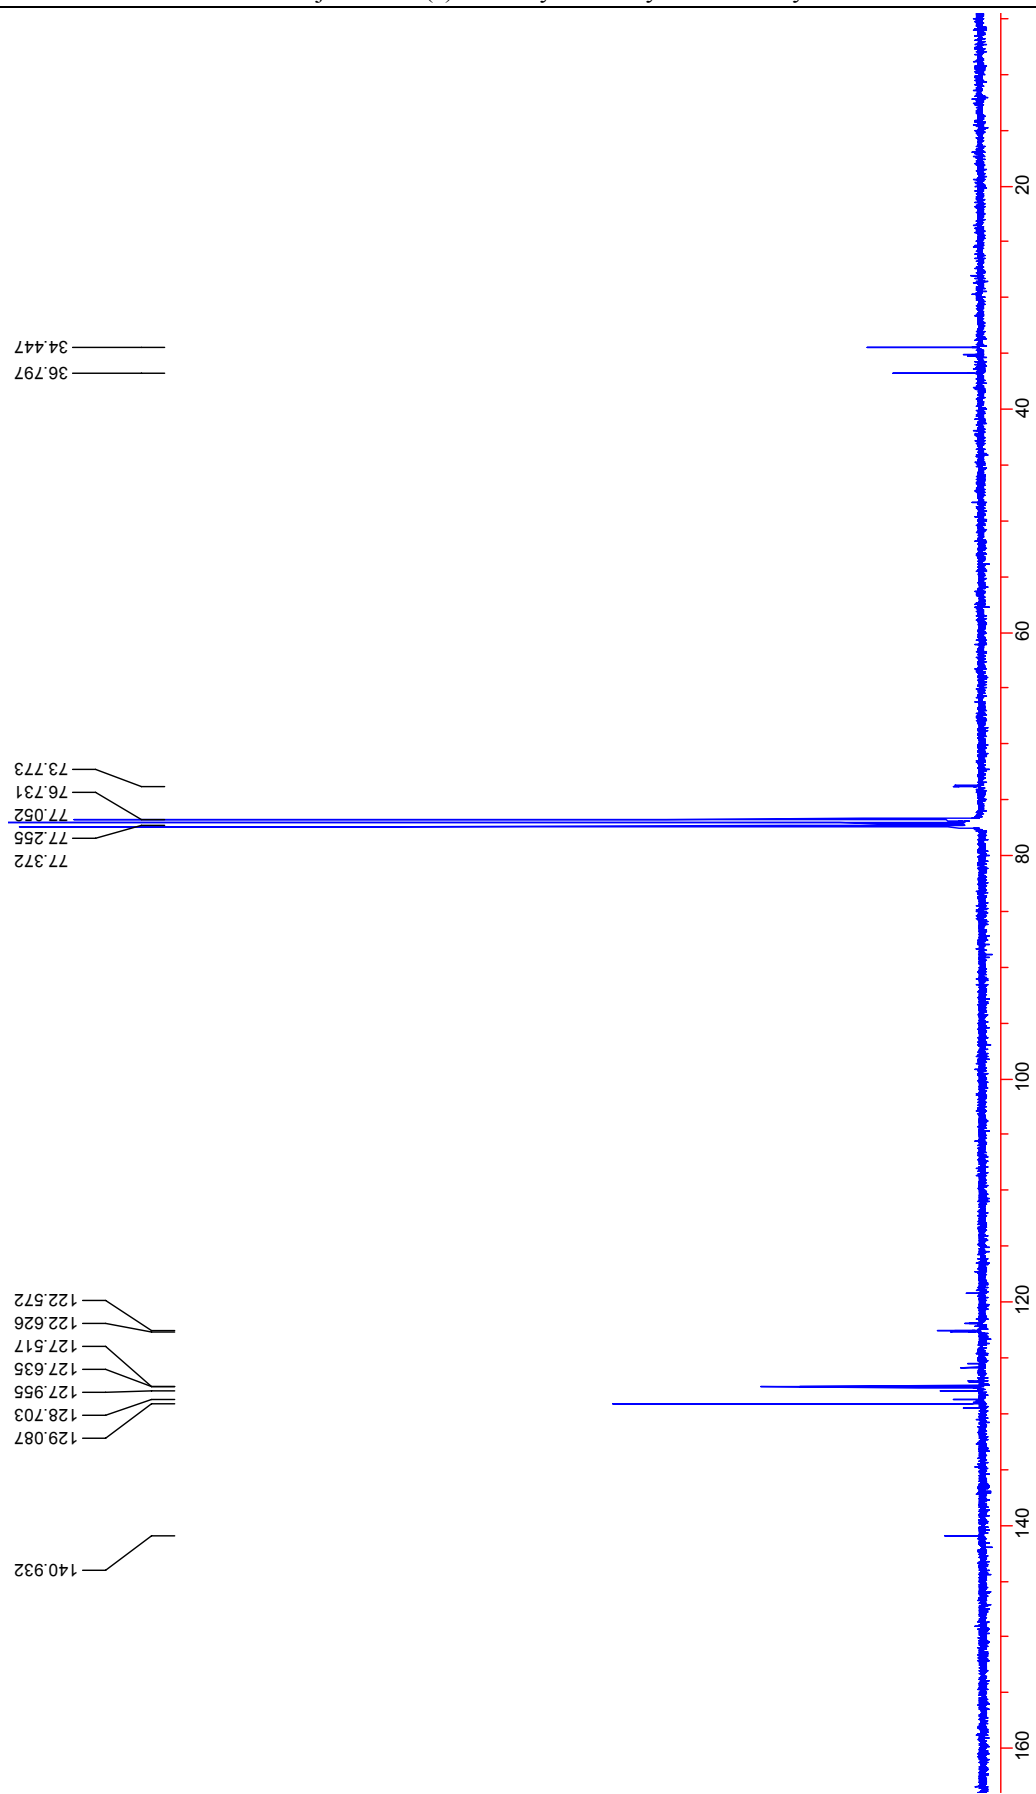



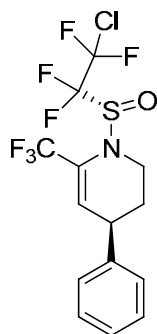

**9**

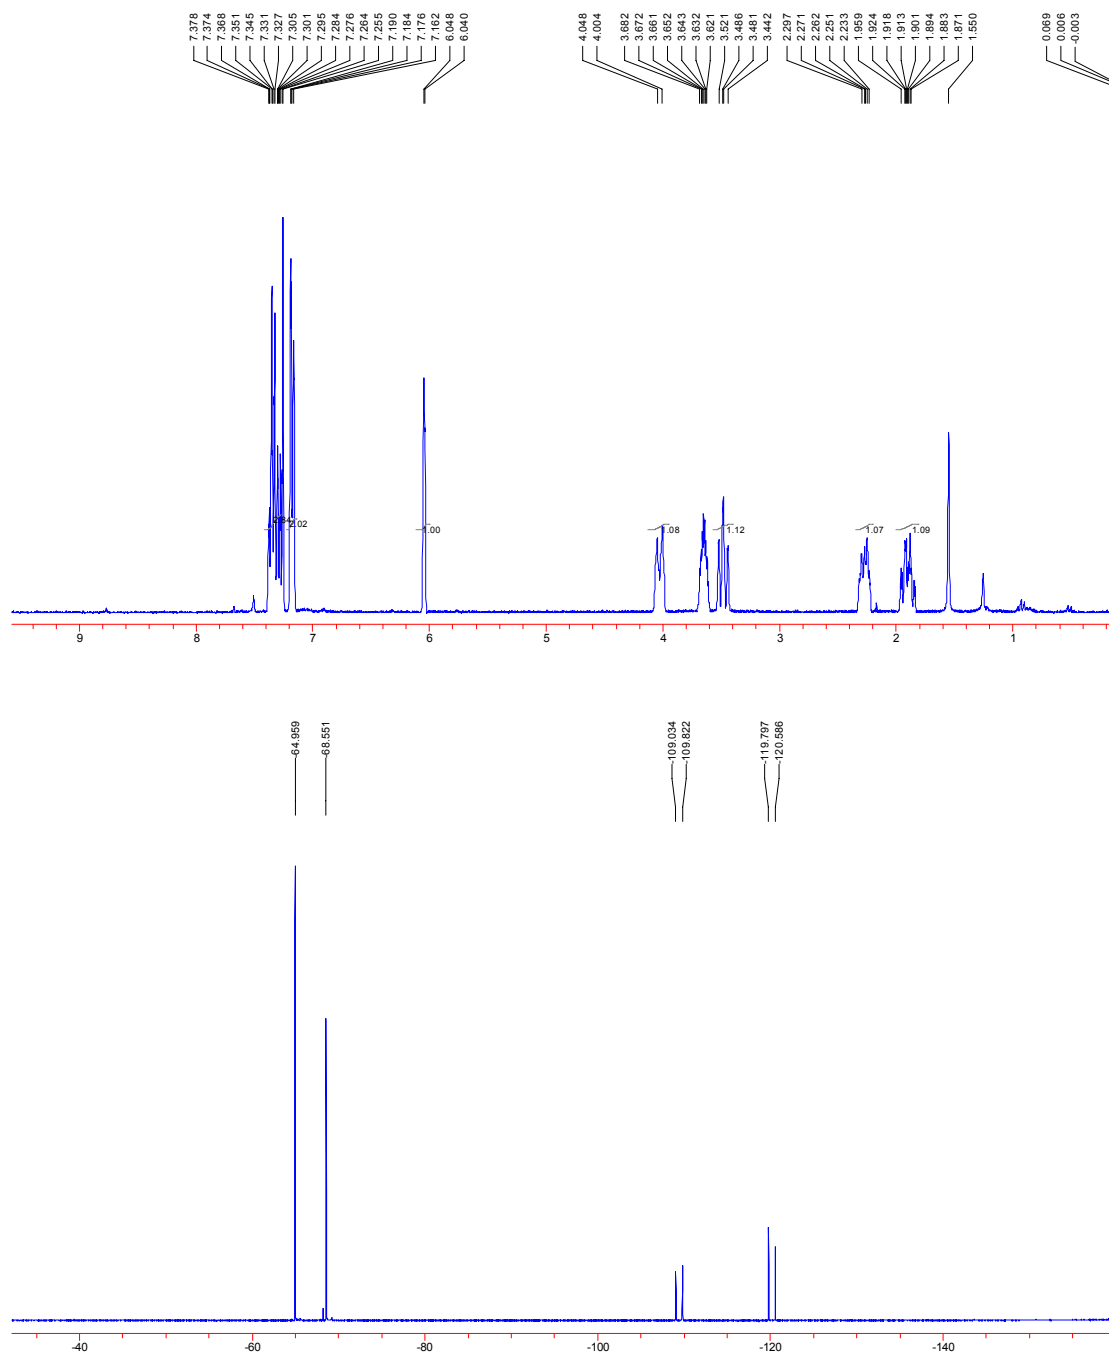

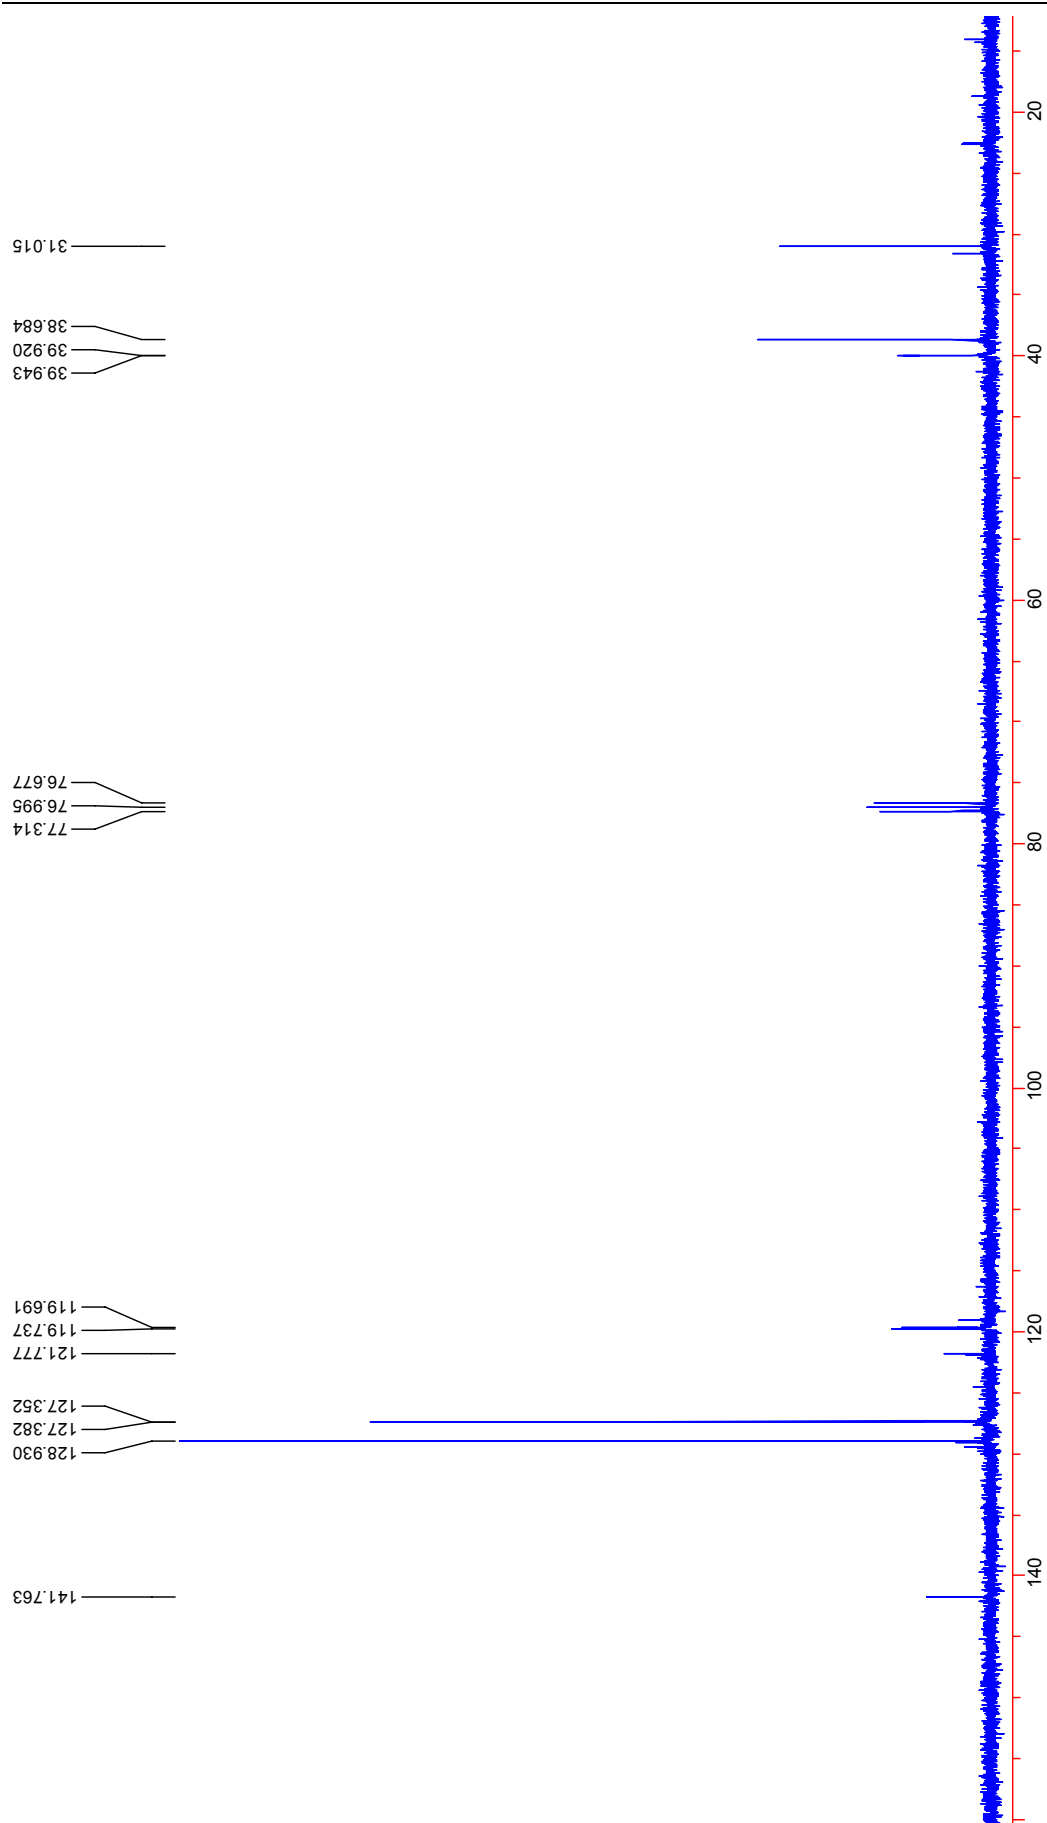



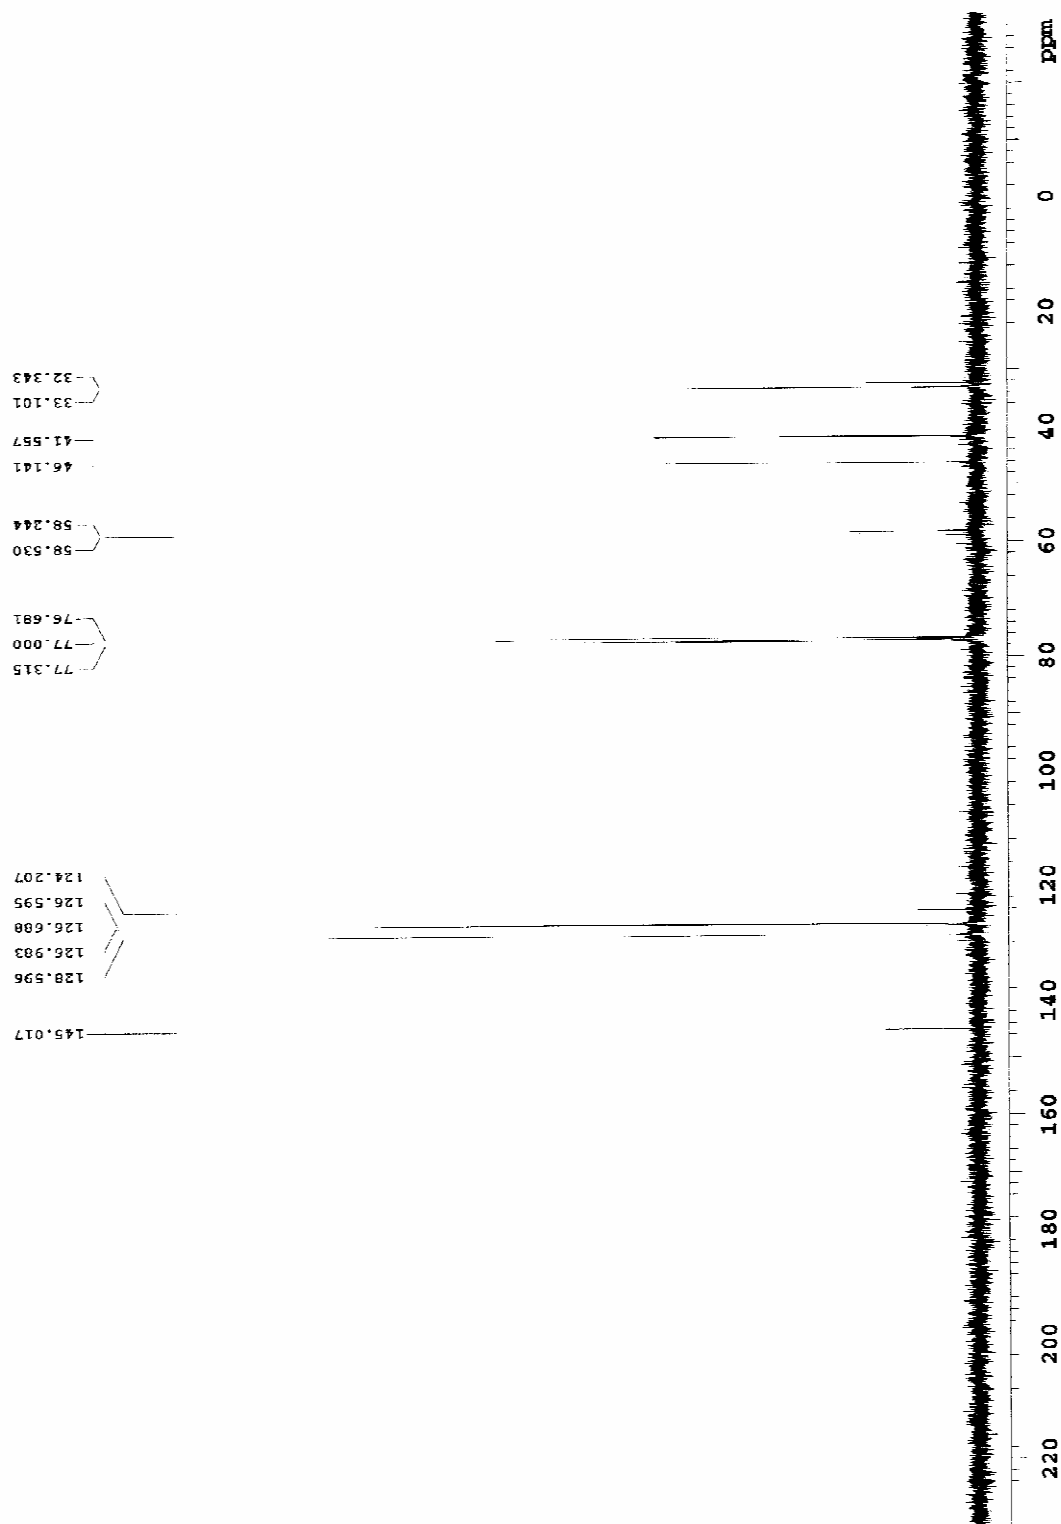

Supplement: c0ob00699h.pdf [file c0ob00699h.pdf]
